# Supplementary material for: Genome-wide identification, classification, and expression analysis of the HSF gene family in pineapple (Ananas comosus)
Source: PeerJ. 2021 Apr 27;9:e11329. doi: 10.7717/peerj.11329 (PMC8086565; doi:10.7717/peerj.11329)
Supplement: Supplemental Information 1 [file peerj-09-11329-s001.xlsx]

## Sheet: AcHSF protein
Table S1. The protein sequences of pineapple HSFs.
>Aco001320
MANKDGGDGSDHGGGSKGRTNGGTAPFLIKTYQMVEDGETDDVISWGEKGRSFVVWKPVEFARDILPVHFKHNNFSSFVRQLNTYGFRKVVPDRWEFANE
NFRRGERILLTEIRRRKSASTAQPPRARKSNGGGSGGIPPPPPSLITNSADGLSSSSASSAAARSPPTQNLLELANEYETLKKDNEILTAELARAKGHCE
ELLGFLSKFLDVNKLDLTLLMQEDATKTLEEVERVNNVGEESVRNSGGCVKLFGAHLKDFEGEDRKKGDGRKRGRYDEGDGCGIGKRPLKCHALWWAVGC
GVGRGGARP*
>Aco002688
MTHKGKGSGSGSGGSGPAPFLMKTHEMVEAAETDDVISWGEEGRSFVVWKPVEFARDLLPLHFKHNNFSSFVRQLNTYGFRKVVPHRWEFANESFRRGEQ
GLLSSIRRRKAAPPLPQSPQPGTSGCSAQLLPPPPPLLFPPSSVTNSGDVHSSSSTSSPSPPPPPTQKLAQLSHENEQLKKHNQILSTELAQAKQQCDEL
LGFLSKFVDVRGLNFDLLMQENAAAEETTKEREDAVERKEEAKEGKLKLFGVILKGLEVGEGNKGGMRKRGLCEEGDACGVDERRPMKMGFGAPPWMGVS
AAAAAVQQRGGKVCN*
>Aco005573
MEEATRVPHGHSLSFAFASPSHHQAPGSNSFLVIDPASFSQLLLPCFFKHNNFSSFVRQLNTYGFRKVDPDRWEFAHESFLRGQTHLLPCIVRRKKTNEI
LAEVKEEEMLIEEVRRLRKEQKALEEELQGMNKRLQTTENRPQQIMSFLTRVAQDPDLLSRLILSKKKQRPGSEHKKPRLMVEPATTKLLEQSVGIASDA
AAPAAKVQWSLEEAEEVPFPFSILGHDISKL*
>Aco005592
MEGSPGSSNSPPPFLTKTYDMVDDPSTDSIVSWGLNNTSFVVWNPRGFEKDLLPKYFKHNNFSSFVRQLNTYGFHKIDPDQWEFANEDFIRGQRHLLKNI
HRRKPVHSHSLHNQGNGPLAEPERQELEEEIEKLKHEKGLLIQELQKHTQQQHGMDQQMQSLEERLQVMEQRQRNLMGSLSQIVQTPGFLSKFVQKPDHF
GKKRRLPKSNFFYEDANMEENRIAPLQVVNKERSDVFATHALDTEPFDKMESSLNSLEIFFRGVSQALGEEDMCYDGFVPGPPSTLVLVEMDASSGETDV
NMHSPPKLRSSSPCIGDIHSSPELAESTNYAESPALPLTEIHVVETHADNQSKIVEIDVNSEPTVAEGDSTREKPNTAASAVPTGVNDVFWEQFLTETPG
SIDAQEVQSERRDADEKRNGGKVVGMGQNWWKKKNVDHLTEKMGHLSSSEKT*
>Aco005862
MEMGRGEVIMVKREKEEGEEEGEGEGEGEVLRPKPMAGLGEAGPAPFLKKTFDMVEDPRTDAVVSWSRARNSFIVWDSHEFASSILPKYFKHNNFSSFVR
QLNTYGFRKVDPNRWEFANEGFLGGQKHLLKNIKRRRNAGLQPDENRLAGPCVELCHFGIKTEESQVKRDRNILMAEVMKLRRQHQNAKAQLIAMEERVK
STERKQQQIMAFLAGVLKNPIVAHRLLLHYKHKKQLEDVGKRQRLMANMNPYSDNMKFREEVRVKSEGESFLSLENSETSCLCSRGEQEEVITESNDYNL
DKISEVVWEELLNVDLTSGSEMVHGDQVEMDLGVDDLGGKPCGWIGDAQNLVQQMDYLDSKH*
>Aco006046
MEEKPVAYDGHEGHAAPFVVKTYQMVNDPRTDVLIRWGMRNNSFLVLNPAEFSQFLLPCYFKHNNFSSFVRQLNTYGFRKVDPDRWEFAHESFLRGQTHL
LPLILRRKKKKSLSNEQSSSNSRAKDSVVDEDEDEDVLVKEVTRLRQEQRLLEEELQGMNKRIQATERRPQQMMLFLAKAADEPESLSRLILSKKQQFAA
EKRRRLVNSPITSTSTTTAPLTLTGPLMELGFNEEVITTHSVDEEKKPLYTVSSSVAGIEPSGWTEFGLEPEPKSASATDSVPFPFSLLGRGFFS*
>Aco008819
MNPYLNPVKEEYPGALAGVAVGASSSLLGSENGLPLLPRPMQGLGDAGPPPFLMKTYDMVDDPCTDQIVSWGVAKNSFVVWDPHAFATTLLPRYFKHNNF
SSFVRQLNTYGFRKVDPDRWEFANEGFVRGQRQLLKNIRRRKPPPPHPVPQQQPLGPYLEVGQFGYEAEIDRLKRDKQLLMAELVKLRQEQQNTKALLRA
MEERLQGTEQKQQQMMVFLARALRNPNFLQQLATQNEKRKQLEEAISKKRRRQIEQASFRGDAGSGSRVEIQTPIKLEAETLERNILLDGVLDLETLALE
MQGLGKRKDKEHIDGELNDEFWEELLNGGIGEENGEVDIEGMSDSAEDVDVLAEKLGFLSSTSPR*
>Aco009685
MDSPPCVVVKEEFPGEEGSAPPPEGVRPHPGPPRPMEGLHDVGPPPFLTKTFDVVDDPATNRVVSWNRAGNSFVVWDPHAFAVSLLPRYFKHGNFSSFVR
QLNTYGFRKVDTDRWEFANEGFLRGQKHLLRIIKRRKPPSCPPSRQQPPSPCLEVGQFGLEGEIDRLKRDKNILLAEVVKLRQVQQATRANIEAMEDRIQ
GTEKKQQQMMAFLAHAMQNPDFFQMLVQQQDKRKEIEEAISKKRRRPIDKAPFYDEGEASPVEGSEAPFPFEFGEIPELDSLALEMLGSENSVAEEIEGE
HKEGGDADSNDGFWEELLNEGIWKMERNSDLEGGDDDEDVDVLVQELGFLNSNSLKTAETMRDGGRDWGDD*
>Aco013873
MGPNPATSEEPPPAAAAAAAGQGQRTAPTPFLTKTYQMVDDPSVDDVISWNGDGSTFVVWRPAEFARDLLPKYFKHNNFSSFVRQLNTYGFRKVAPDRWE
FANESFRRGEKQLLCEIHRRKISLAAAAAVPAGIPLAAARVASPASSASTGSSGGGAAGRSKGESLTEENERLRRENTKLAEELAQMKNLCNNILHLMSR
YVSAEQFRMDAAAAAAAPGSEREGDGAIAKLFGVPIGIKRPRESDLSPEVKPEPYDAKTNFKAAAAAEEADEEEEEEEEGGGHHRRWFSLRCKWPIQRAC
N*
>Aco015210
MDRFLYNPFIRDILLRKEGEGEEEEEEEEAPQPMAGLQDAGPPPFLTKTFEMVEDPATDGVVSWSRGRNSFVVWDAHAFATTLLPRYFKHNNFSSFIRQL
NTYEGGSGPLEFANRDFLGGQRHLLKNIKRGATRRPLTLSHYGGVESSSGFVQLGKFGAEAEAEQQQGSRAQLLAMEQRVHGTERRHKQTMSFLARAVRN
PAFLQQLAGFRGECELLLSGAGKRRRLPLNPFAGNVDPAVAGAGMQSLLPTIHDRDDTVDVEPNATGVVTDMIWEELLNDAPVLGSEVQDEQQEIEIEVE
EFAAEPCRWGDDEVHDLVEQMGIVGNLQQTVG*
>Aco016114
MAAPTPRPSANRGLRAAATVEPRRCVVRDGSPSAVLAEHHARGVASWRTGSRIGCGMGSGLGWAAIMSAMVQRIQGSSAAAAAAAGARWESLRRAAHAGT
TIAAPPSSSRSPAASPPSLATTMTTPASRRGRGREREGSPLLLLLHHHHCRRRDLLLFLYTVMDGGGGGGGGGPAPFLIKTYEMVDDAATDDIVSWSPTE
TSFVVWNPPEFAARLLPTYFKHNNFSSFIRQLNTYGFHKIDPERWEFANDYFIKGQKHQLKNIHRRKPIHSHSHPPGSLADSERAALEEEIERLTREKAS
LHNDLWRFKQQQSGAKIQIEDLDRRLLDMEQRQLKLIAFVQRAMRNPKFRDNLIKMAGASLLADSVDAIHKKRRLPGVEVTENSSFYDDHSSTSKPDANN
LFQQDFCDKLQLGLCSAMTVASTQCSDDDNVSKNPECGRAVECLSDTGASFCSSKNVLVPRQIDEGLFPCHLNLTLASSSMQIDRNQYSNRTQSTEEQEP
GNSTELNLASTSRDDGLRKLVGNSSSTGGDSHANVTSLKEGAPVSNELPAAQPARVNDVFWEQFLTERPGSSDTEEASSSLRANPSGEHQEDRKQGSEDM
K*
>Aco016689
MEPSDKKPCPPATPTHSTSSSSSSSSALMGTRYRYLASTVDLPISSPSHFLAHPSSPSPLLPIKPKIEPPGDILEFPSFSPPSVPPTSLRGEAGEGEATD
VPRPLEALQGTPIPPFLSKTYDIVDDSSLDPVVSWGPTGKSFVVWDPVEFARAVLPRHFKHNNFSSFVRQLNTYVESTVHRIGGDWSVGVGLVFLQGFRK
IEADRWEFANEDFLKGSKGLLKNIIRRRSSQVQQVSTQIGSSELASPAVEGELHTLRREKHTLMQEVAKLKQEHITTIQQVSALNQRLQSAEEKQKQMVS
FLAKLLKNPEFLACLKQQKEQKRIALPRPKRKFLKHQEVVCSDFLEAVTQQSGEDILEITAPASSYGLQELTGVLAETGEEFGTLFLESDAAAFKNENLE
SAQTDIGAQYSVSFPVDIDPDKALQGTVFPPSSRAGSDPTIADPKGKNVIDLKLDVASSVSEYLISFPEDSSFENTWSVGLGAGESFLSSDYTIWDSIGH
DFQQLEVGAEPGTPWDLDLQALEEQLVSENSVHDDSPSHEKGNQRAVNRNTENMEP*
>Aco016980
MEGAGGGGGGAGGGGAAAAVAAAAAAGANPSLNGNAPPPFLSKTYDMVDDPATDAVVSWGNGNNSFVVWDPPEFARDLLPKYFKHSNFSSFVRQLNTYGF
RKVDPDRWEFANEGFLRGQKPLLKTINRRKASHPPSQPHNNNASVAACVEVGKFGLDEEIERLKRDKNVLMQELVRLRQQQQTTDHQLQTLGNRLQGMEH
RQQQMMSFLAKAVQSPGFLAQFVQQNDSNRRIVSVNRKKRRLPNQEGSPDGQIIKYQPLMNEAAKAMLRKILNMDSPPCFDSSNSSDSLLLENFEGASST
TRNSGVTLAEVSSFSAEAQSPTINLADKNSPTVPGTSIPDFPELQNMVTDKNSTVDVPEKSFVVPDPEGIYVNPNAAEEDDVVPIELDGLLYDGDQKLPE
IIDSFWEQFLATSPLLGDSEEVESSAQNMEHLTEQMGLLSSDPRV*
>Aco017163
MAFLVERCGEMVVSMDQSHKPVPAPFLTKTYQLVDDPCTDHIVSWGEDDTTFVVWRPPEFARDLLPNYFKHNNFSSFVRQLNTYGFRKIVADRWEFANEF
FKRGAKHLLSEIHRRKSSQPSSHHYYHSPPPPPLPPPSSYNHHNPHPEDHMSISWINDPSALLPPPAHSNVGHDHNNASEFLSALSEDNQRLRRRNSVLL
SELTHMKKLYNDIIYFLQNHVTPISPRPSNCSSRILELGPSTQYHPPHPPHPPPPPLYRIRNCAMEIAEEEEEEEEEEEEETDGGAVKLFGVPIHGKKRL
HEETATVPDEESDDHGSI*
>Aco020850
MGRGGGGAAASAAAAGPNPSLNGNAPPPFLSKTYDMVDDPATDAVVSWGNGNNSFVVWNTPEFARDLLPKYFKHNNFSSFVRQLNTYGFRKVDPDRWEFA
NESFLRGQKHLLKTINRRKSSHPHNETPQPKSQTAACVEVGKFGLEEEIERLKRDKNILMQELVRLRQQQQATDQQLHTLGNRLQGMEQRQQQMMSFLAK
AMQSPGFLAQFMQQNDSNKRIAAASKKRRLPKQEAGLDAGSNSPDGQIVKYQPMINEAAKAMLRQILKLDGSSPPRLEQLSNSDNFSLENFMPPSEATTF
DSTSSNTNSGVTLAEVPSGLSVPYVTASTGFSAICLSSAASEIQSPIGLSDNKNSSEELRDMDVLSSVPETIPSPSPTDMSIPEFPELQDIVSEDSVVNI
PGESFVGACINPIAEVEADNAVPIETDDILYGDDEQKLPGIIDTFWEQFLASSPISSEAVEEVELSRQEGKVVMQQRPQNSNNGWDSARNMENLTEQMGL
LSSDRKESYACYAAALGIPVATNLSLNWGSICRAAEAGAVHLASAPCAHTRACACACACVALDLLAIDPVEVVP*
>Aco021879
MVRVATYFAMTFGAFLFWQSMDRLHVWIALHQDEKLKMPLTRSQAAGAAEAADAEEVGTSVTSGSSGIHELQDQLAKLTDLVAQQAAAARHVAMEAENSS
SAGGGGGGGAAPQPPVVPPFLTKCYDMVDDPATDATVSWSEGNNSFVIWDPHAFARDLLPKYFKHNNISSFVRQLNTYGFHKVDHDRYEFANEGFLRDQK
HLLKTIVRRKPSHNAAQHPPSQAKNTSVNACIEVGKFGLEEEIERLKRDKTVLMQELVKLRLHQQSTDHELQSLRQRLQGMEQNQQQMMSFLAMAVQSPA
FLAKLVQKSGNSNRWKTEANKKRRLPALEQGNNITYPESSSSDGQIIRYQPLVTESFNSSMPPSVPNSHISEQLQNMANSANNLSECGDFILPDYLEQLL
ASPPLDNGVGPDPESLGILDLSIDDFDFSEQDIQMEVAQDMVPDEINGGSQSRPEMDHVFLEIS*
>Aco022471
MLCGGCSHHHFIASDLKGFHKVDHDRYEFANEGFLRDQKHLLKTIVRRKPSHNAAQHPPSQAKNTSVNACIEVGKFGLEEEIERLKRDKTVLMQELVKLR
LHQQSTDHELQSLRQRLQGMEQNQQQMMSFLAMAVQSPAFLAKLVQKSGNSNRWKTEANKKRRLPALEQGNNITYPESSSSDGQIIRYQPLVTESFNSSM
PPSVPNSHISEQLQNMANSANNLSECGDFILPDYLEQLLASPPLDNGVGPDPESLGILDLSIDDFDFSEQDIQMEVAQDMVPDEINGGSQSRPEMDHVHG
QL*
>Aco027352
DTTISMMTMMMEEDGSKNKNKNNNDHMMMIRGYRGGGGGALAAAPFVVKTYRMVNEPSTDAVIAWGKENNSFVVVDPFVFSQTLLPAHFKHNNFSSFVRQ
LNTYGFRKVDPDRWEFAHASFLRGQTHLLRQIARRNSGGGGGGGGSNSSSSACCSSSSSSSSTTTSTGWGVNGKKKKKMMMTTTMEEGDEAAVAEEVVRL
KQEQKAIEERVARMWRRVQETERRPRQMLEFLFKLVGDPQLLPRLIVGPGPTPPPPPPPAAAPATATAAVPECGGGGGGEKRARRLRELEADREARPGVA
GLCSWPLDSEGAAAGGFYDRRGEDELISAVDQPVGFLYGGDGGDYGGVVDGGGSSGGGFYPYAFPVGNGY*
>Aco027680
MGGGGGGGAAAMAPPPVGEQAGDTTSAAAAAAGGQRSLPTPFLTKTYQLVDDPAVDDVISWNDDGSTFIVWRPAEFARDLLPKYFKHNNFSSFVRQLNTY
GFRKIVPDRWEFANDCFRRGERRLLCDIHRRKITPPAAGAAAPSAAQVTVAAAIPVAVPVTHTGSPTISGEEQVLSSNSSPGAPPPPPPPPLTAASAPST
SGSGGAGDLHEENERLRGENSRLSRELGQMKNLCNNILLLMSKYAASQQPGSDSSSPAPPPPEAAPMLELMPSSAAAAAAAAAAALEEEEEEEEEEAVDE
AEEEEDPVKAEEEGTPSPRLFGVSIGIKRSREDDGEDPPPPAMAEVKSEPPDPQEGPGAHQSWPIYRPRAIHHSQRSSATSSNGPDRDGQ*
>Aco027746
MGRGGGGAAASASAAAGPNPSLNGNAPPPFLSKTYDMVDDPATDAIVSWGRENNSFVVWNTPEFARDLLPKYFKHNNFSSFVRQLNTYLQPARTVLWGDT
RYNPVMSTPEHIARGEATTLEQGLKSGTGLPDLGPVPESFSRGLRRLRAMRPVSLNGTGLWGPGFRKVDPDRWEFANESFLRGQKHLLKTINRRKSSHPH
NETPQPKSQTAACVEVGKFGLEEEIERLKRDKNILMQELVRLRQQQQATDQQLHTLGNRLQGMEQRQQQMMSFLAKAMQSPGFLAQFMQQNDSNKRIAAA
SKKRRLPKQEAGLDAGSNSPDGQIVKYQPMINEAAKAMLRQILKLDGSSPPRLEQLSNSDNFSLENFMPPSEATTFDSTSSNRNSGVTLAEVPSGLSVPY
VTASTGFSAICSSSAASEIQSPIGLSDNKNSSEELRDMDVLSSVPETIPSPSPTDMSVPEFSELQDIVSEDSVVNIPGESFVGAYINPIAEVEADNAVPI
ETDDILYGDDEQKLPGIIDTFWEQFLASSPISSEAVEEVELSGQEGKAVMQQRPQNSNNGWDSARNMENLTEQMGLLSSDRKG*
>Aco030273
MANKDGGDGSDHGGGSKGRTNGGTAPFLIKTYQMVEDGETDDVISWGEKGRSFVVWKPVEFARDILPVHFKHNNFSSFVRQLNTYGFRKVVPDRWEFANE
NFRRGERILLTEIRRRKSAPTARPPRAGKSNGGGSGGVPPPPPSSITNSADGLSSSSASSAAARSPPTQNLLELANEYETLKKDNEILTAELARAKGHCE
ELLGFLSKFLDVNKLDLALLMQEDATKTLEEVERVNNVGEESVTNSGGCVKLFGAHLKDFEGEDRKKGDGRKRGRYDEGDGCGIGKRPLKCHALWWAVGC
GVGRGGARP*
>Aco031324
LIDRVAGFLNVLHAQGFRKVVPERWEFANEFFRKGEKHLLCEIHRRKSPAASASSSSSSFPSPSSPHLFPSPQHLPLFHHHHHHHHLPLPPWTDSPSPPR
LLVLGPTPTASASASAAAANVGGAAAAAALVEENERLRRSNAALVAELAHMRKLYNDIIYFVQNHVQPVAPSSAASPLVAARGLRGLVDQRRSAATKPEL
NSASTTSSSSLTIADEPSPPPAPPPPPPQNQNDNGESSSARPKLFGVPLNGCSPKRPLNRDEPTSPSTKPRLVLENEDLGFNLMPRSPLSA*
