# Supplementary material for: Genome-wide identification, classification, and expression analysis of the HSF gene family in pineapple (Ananas comosus)
Source: PeerJ. 2021 Apr 27;9:e11329. doi: 10.7717/peerj.11329 (PMC8086565; doi:10.7717/peerj.11329)
Supplement: Supplemental Information 2 [file peerj-09-11329-s002.xlsx]

## Sheet: OsHSF protein
Table S2. The protein sequences of rice HSFs.
>OsHsf-A7a
MLKPQTPRARRAAHPNSHMASSSSSSSLCRLLIPRPTTRRFSGGGGEGGMAAAAPVKREVKPEAGEGWGGGDLGVVPPPP
RPMEGLGEAGPAPFVAKTYEMVADAATDAVVSWGPGGSGASFVVWDPHALAAGVLPRFFKHANFSSFVRQLNTYGFRKVT
PDRWEFANEAFLAGQKHLLKNIKRRRVSKPLVDSQLRNKASVVFGQPEAPGEVVSLKRDRAALRAEVIMLKQQYNACKSQ
LIAMEEMVRNIERRQQQTIGFFAKVLTNPAFVQQVLLNYVNKNGLRGAAKRQRLMENEEQHADSPLNKGMEAASVMEADV
SPGSTGCGTVGKVETTPMCNFQNIENMCDDVWEELDALPETGMEQEEKAGIGSFDVEEFVGRPCGWVDDCPYLVEPMQFV
EH*
>OsHsf-C1a
MDGLHTELALGLIGCCGGDGQQQTAPFVAKTYQMVCDPRTDALVRWGRDNNSFVVVDPAAFSQLLLPCFFKHGNFSSFVR
QLNTYVSIIQSPAPGFRKVHPDRWEFAHESFLRGQTHLLPRIVRRKKRGEGGGGGGGASCSFGGGAGEHQVAAAAASVGM
SGEEEDAAEDVLAKEAALFEEVQRLRHEQTAIGEELARMSQRLQATERRPDQLMSFLAKLADDPNAVTGHLLEQAAERKR
RRQHLPSHEPTVCPLPPAPPPQPPQPLLALAGAAAMDGTYWWTTEHHHHHHHQMKPMTVLPSLEPPTASCGVHQVPELGG
GGVMGLTTDGEAKVEPPFPFCLLGQAFF*
>OsHsf-C1b
MMGGECKVHQLQAAGDGGPGAVAPFVAKTFHMVSDPSTNAVVRWGGAGNTFLVLDPAAFSDFLLPSYFKHRNFASFVRQL
NTYGFRKVDPDRWEFAHESFLRGQAQLLPRIVRKKKKGGAAPGCRELCEEGEEVRGTIEAVQRLREEQRGMEEELQAMDQ
RLRAAESRPGQMMAFLAKLADEPGVVLRAMLAKKEELAAAGNNGSDPCKRRRIGADTGRGGVATGGDAAEMAQSRGTVPF
PFSVLGQVFY*
>OsHsf-A4a
MEGGGGGGSLPPFLSKTYEMVDDPSTDAVVGWTPAGTSFVVANQPEFCRDLLPKYFKHNNFSSFVRQLNTYGFRKVDPEQ
WEFANEDFIKGQRHRLKNIHRRKPIFSHSSHSQGAGPLTDNERKDYEEEIERLKSDNAALSSELQNNTLKKLNMEKRMQA
LEEKLFVVEDQQRSLISYVREIVKAPGFLSSFVQQQDHHRKKRRLPIPISFHEDANTQENQIMPCDLTNSPAQTFYRESF
DKMESSLNSLENFLREASEEFGNDISYDDGVPGPSSTVVLTELHSPGESDPRVSSPPTRMRTSSAGAGDSHSSRDVAEST
SCAESPPIPQMHSRVDTRAKVSEIDVNSEPAVTETGPSRDQPAEEPPAVTPGANDGFWQQFLTEQPGSSDAHQEAQSERR
DGGNKVDEMKSGDRQHLWWGKRNVEQITEKLGLLTSTEKT*
>OsHsf-C2a
MTTTTAEGGGGVAPFVAKTYRMVDDPATDGVIAWGRDSNSFVVADPFAFSQTLLPAHFKHSNFSSFVRQLNTYGFRKVDP
DRWEFAHVSFLRGQTHLLRRIVRRSSGGGGAKRKEEAGGCGGGGEAAAGDVDEESAVVALEVARLRREQREIEGRVAAMW
RRVQETERRPKQMLAFLVKVVGDPQVLRRLVDRDNTNAAASNADDSAVHHQVKRPRLLLDSSSTTTTHGDRHLVTAAADG
FYAGGCGPEAAAAAAFVPDDAVDFTGLYTGGDGFGNAVVDAGVDYPPAYAFPVVDSGY*
>OsHsf-A5
MEVAAGARGGGAGGGGGGPAPFLLKTYEMVDDPSTDAVVSWSDASDASFVVWNHPEFAARLLPAYFKHSNFSSFIRQLNT
YGFRKIDPERWEFANEYFIKGQKHLLKNIHRRKPIHSHSHPPGALPDNERAIFEDEIERLSREKSNLQADLWKSKQQQSG
TMNQIEDLERRVLGMEQRQTKMIAFLQQASKNPQFVNKLVKMAEASSIFTDAFNKKRRLPGLDYSIENTETTSFYDDHSS
TSKQETGNLLNQHFSDKLRLGLCPAMTESNIITLSTQSSNEDNRSPHGKHPECDMMGRECLPLVPQMMELSDTGTSICPS
KSSCFAPPISDEGLLTCHLSLTLASCSMDVDKSQGLNANGTTIDNPTEAATATMEKDDTIDRSFDDNQKKSADSRTADAT
TPRADARVASEAPAAPAAVVNDKFWEQFLTERPGCSETEEASSGLRTDTSREQMENRQAYDHSRNDREDVEQLKL*
>OsHsf-A3
MDHNTDPPPTTMVDAAAALLLEPKLEGYDDDGGGEPLQPAPFVSPLDQLMQPPRPLEALLQGPQLPPFLSKTYDLVCEPE
LDGVISWGHAGNSFVVWDPSAFARDVLPHHFKHNNFSSFVRQLNTYGFRKVHADRWEFAHEDFLRHSKHLLKKIVRRRSS
PTQQSGLQPGSSGESGLDPELNTLRREKSALLQEVTRLKQEHLQTIEQMSTLNQRLESAEDRQKQMVSFLAKLLQNPTFL
RQLKMHRQQKEIDSTRVKRKFLKHVPHGNIDSGESSSQHTGESNLDFSPTSLDLPATHSDILDLQNFLLEDGDLNLAMLP
ENIGLDGIEAPDDIGALVQGFDTQEELELGSGVELLEIPPASGPRGQDPTIGRSKGKNVLSPGLDATSSEADCLGSFSDN
MGMLSDSMLQTAGKLMDADDDERIWGVDASSALQSSCSGTSQQAYGSLVSDPYLMEMANKPEKFWELDFQALDDGDLQLD
KCVIDDPALQQQRGNMNS*
>OsHsf-A6b
MEKMMPGMVKEEWPPSSPEEGEAPRPMEGLHEVGPPPFLTKTFDLVADPATDGVVSWGRAGSSFVVWDPHVFAAVFLPRF
FKHNNFSSFVRQLNTYFLVRTNYLNKRSHFYSLRFQGFRKIDPDRWEFANDGFLRGQRHLLKMIKRRRPLSYLPGSQQAL
GTCLEVGQFGLDEEIDRLKRDKNILLAEVVKLRHKQQSTKANMRAMEERLQHAEQKQVQMMGFLARAMQNPDFFHQLIHQ
QDKMKGLEDTFSKKRTRSIDIVPFLNPGEVSQGDQLESTLLFDPRPFAELNDEPAKSELENLALNIQGLGKGKQDVNRTR
NQPRNQASNETELTDDFWEELLNEGARDDAGIPGMERRRPRYVDALAQKLGYLSNSSQK*
>OsHsf-A9
MGSKKRSPQHPAAAAPPPAVGGGGGGEVSGDGGASTANGPVVPKPSEVAPFLTKVYDMVSDPATDNVISWAEGGGSFVIW
DSHAFERDLHRHFKHSNFTSFIRQLNTYGFRKVHPDRWEWANEGFIMGQKHLLKTIKRRKKSSQESPSEIQKAPVKTAPG
TENIEIGKYGGLEKEVETLKRDKALLMQQLVDLRHYQQTSNLEVQNLIERLQVMEQNQQQMMALLAIVVQNPSFLNQLVQ
QQQQQRRSNWWSPDGSKKRRFHALEQGPVTDQETSGRGAHIVEYLPPVPETSGQVNPVEGAICSANSQPVPSPAVATPMD
MQTSNVADTLGSSEEPFADNSTLHEWDDNDMQLLFDDNLDPILPPFENDGQMGPPLSVQDYDFPQLEQDCLMEAQYNSNN
PQYADVITEA*
>OsHsf-B4d
MAFLVERCGGEMVVSMERSHGRSTTTAAAVTAAPAPFLSKTYQLVDDPSTDDVVSWGEDEATFVVWRPPEFARDLLPNYF
KHNNFSSFVRQLNTYGFRKIVADRWEFANEFFRKGAKHLLSEIHRRKSSSCSQPQPPPPFPMHQHYPLSLFSPPTTPRSP
PVGAAAAAAYHFQEEYCSSPADYAGGGGDLLAALSEDNRQLRRRNSLLLSELAHMRKLYNDIIYFLQNHVEPVAPPPLAA
ATSCRLVELGPSTTERRRCAASPSGDNDDDAAVRLFGVRLDDDHGKKRRVQLVQEDEGDEQGSEG*
>OsHsf-A2e
MNPLRVIVKEEELDFAAAAAAAAAGEGSPSSWAVGVMDLPRPMEGLGEAGPPPFLCKTYEVVDDPGTDTVISWGFAGNSF
VVWDANAFAAVLLPRYFKHSNFSSFVRQLNTYGFRKVDPDRWEFANEGFLRGKKELLKTIKRRRPPPSSPPSSSSSSSSS
QHQQQPAAACLEVGQFGRDGVVNRLQRDKSVLIAEVVKLRQEQQTTRAQMQAMEERISAAEQKQQQMTVFLARAMKNPGF
LQMLVDRQAGQHGARNRVLEDALSKKRRRPIEYLLTRNGETCAAGESAAMLAADGVAEPDGDTTPRGDGGGGGGGDTESF
WMQLLSLGLEEKQREDGVAGGVQESNSGGADVDNDEEDDDDDVDVLVQSIYHLSPK*
>OsHsf-A2a
MNYRVVNPVKVESGPSTGVANGQPPRPMDGLADGGPPPFLTKTYDMVDDPTTDAVVSWSATNNSFVVWDPHLFGNVLLPR
YFKHNNFSSFVRQLNTYGFRKVDPDKWEFANEGFLRGQKHLLKSIKRRKPPNSSPSQQSLGSFLEVGHFGYEGEIDQLKR
DKHLLMAEVVKLRQEQQNTKSDLQAMEQKLQGTEQKQQHMMAFLSRVMHNPEFIRQLFSQSEMRKELEEFVSKKRRRRID
QGPELDSMGTGSSPEQVSQVMFEPHDPVDSLFNGVPSDLESSSVEANGGKAQQDVASSSSEHGKIKPSNGELNEDFWEDL
LHEGGLDEDTRNPAIDDMNLLSQKMGYLNSSSTKSPQ*
>OsHsf-A1a
MEAAVAAAAAAAGAVTTAVAPPPGAAVSNGVATAPPPFLMKTYEMVDDPATDAVVSWGPGNNSFVVWNTPEFARDLLPKY
FKHSNFSSFVRQLNTYGFRKVDPDRWEFANEGFLRGQKHLLKTINRRKPTHGNNQVQQPQLPAAPVPACVEVGKFGMEEE
IEMLKRDKNVLMQELVRLRQQQQTTDHQLQTLGKRLQGMEQRQQQMMSFLAKAMHSPGFLAQFVQQNENSRRRIVASNKK
RRLPKQDGSLDSESASLDGQIVKYQPMINEAAKAMLRKILKLDSSHRFESMGNSDNFLLENYMPNGQGLDSSSSTRNSGV
TLAEVPANSGLPYVATSSGLSAICSTSTPQIQCPVVLDNGIPKEVPNMSAVPSVPKAVAPGPTDINILEFPDLQDIVAEE
NVDIPGGGFEMPGPEGVFSLPEEGDDSVPIETDEILYNDDTQKLPAIIDSFWEQFLVASPLSVDNDEVDSGVLDQKETQQ
GNGWTKAENMANLTEQMGLLSSHHTG*
>OsHsf-B2a
MASPAAGTPPFLTKTYAMVEDPSTDETISWNDSGTAFVVWRPAEFARDLLPKHFKHSNFSSFVRQLNTYGFKKVVADRWE
FANDCFRRGEKHLLGGIQRRKGSGTGGAGAAPAGGIPTAIPISSPPTSSGGEPAVSSSPPRGAAGIAAGVSGAVAELEEE
NARLRRENARLARELARARRVCDGVRRLVSRYDHDHGGGEEEAGEGDVKPMLFGVAIGGKRSREENGEDEEEEEEEGADE
DGEDDEVEEDDEERERHAARRVPVREGKVRRTTELSDLDVLALSVRAAAAARPGGASRDRKSSVS*
>OsHsf-A4d
MESSNLGGGGGGGGGGGPPPFLIKTYEMVEDAATNHVVSWGPGGASFVVWNPLDFSRDLLPKYFKHNNFSSFIRQLNTYG
FRKIDPERWEFANEDFIRGHTHLLKNIHRRKPVHSHSLQNQINGPLAESERRELEEEINRLKYEKSILVADLQRQNQQQY
VINWQMQAMEGRLVAMEQRQKNIVASLCEMLQRRGGAVSSSLLESDHFSKKRRVPKMDLFVDDCAAGEEQKVFQFQGIGT
DAPAMPPVLPVTNGEAFDRVELSLVSLEKLFQRANDACTAAEEMYSHGHGGTEPSTAICPEEMNTAPMETGIDLQLPASL
HPSSPNTGNAHLHLSTELTESPGFVQSPELPMAEIREDIHVTRYPTQADVNSEIASSTDTSQDGTSETEASHGPTNDVFW
ERFLTETPRSCLDESERQESPKDDVKAELGCNGFHHREKVDQITEQMGHLASAEQTLHT*
>OsHsf-C2b
MAAAAGGGAAPFVWKTYRMVEDPGTDGVIGWGKGNNSFVVADPFVFSQTLLPAHFKHNNFSSFVRQLNTYGFRKVDPDRW
EFAHASFLRGQTHLLRNIVRRGSAAAGGGGGGGGGKRRDASADGGGGGGDEDMTMVATEVVRLKQEQRTIDDRVAAMWRR
VQETERRPKQMLAFLLKVVGDRDKLHRLVGGGGNGNGAATAAAADNGFADAARAGCGEKRARLLLDGDNTGAFGPDAVDF
AGFYTGADMFPDVAVDAAAAAAGGSAGCSFAFGVDSGY*
>OsHsf-A7b
MDYSTVKQEEVEVVVLDGEEEAAAAAAPVPLPAAMGVGAAVAPFLVKTFEMVEDPATDAVVSWGGAARNSFVVWDPHAFA
AGLLPLHFKHANFSSFLRQLNTYGFRKVSADRWEFANEDFLGGQRHLLANIRRRRRGAGTGSTTPRAVNCGGGGGEGEVE
RLRRDKEALARELARLRRQQQEARAQLLDMERRVRGTERRQEQCTEFLARALRSPDVLDNIARRHAAAVERKKRRMLAAA
ADDDGLTFEALALAAAADTSHSTGGAVTTDMIWYELLGEEQAEIDIEVDQLVASASAAADTASEAEPWEEMGEEEVQELV
QQIDCLASPSS*
>OsHsf-A2b
MDDPMLNAVKEEESHGDGGGLEVVAGEDGAAAVAAGVAPRPMEGLHDAGPPPFLTKTYDMVDDAGTDAAVSWSATSNSFV
VWDPHAFATVLLPRFFKHNNFSSFVRQLNTYGFRKVDPDRWEFANENFLRGQRHLLKNIKRRKPPSHTASNQQSLGPYLE
VGHFGYDAEIDRLKRDKQLLMAEVVKLRQEQQNTKANLKAMEDRLQGTEQRQQQMMAFLARVMKNPEFLKQLMSQNEMRK
ELQDAISKKRRRRIDQGPEVDDVGTSSSIEQESPALFDPQESVEFLIDGIPSDLENSAMDAGGLVEPQDFDVGASEQQQI
GPQGELNDNFWEELLNEGLVGEENDNPVVEDDMNVLSEKMGYLNSNGPTAGE*
>OsHsf-B4b
MAFLVERCGEMVVSMEMGPHGGGGAAAGKPVPAPFLTKTYQLVDDPCTDHIVSWGEDDTTFVVWRPPEFARDLLPNYFKH
NNFSSFVRQLNTYGFRKIVADRWEFANEFFRKGAKHLLAEIHRRKSSQPPPPPMPHQPYHHHHHLNPFSLPPPPPAYHHH
HLIQEEPATTAHCTVAGDGGEGGDFLAALSEDNRQLRRRNSLLLSELAHMKKLYNDIIYFLQNHVAPVTTTTTTPSSTAM
AAAQHHLPAAASCRLMELDSPDHSPPPPPPKTPATDGGDTVKLFGVSLHGRKKRAHRDDDDGVHDQGSEV*
>OsHsf-B4a
MEWEEESEAARQKAAAASASVVPAPFLTKTYQLVDDPATDHVVSWEDDDGGESASSFVVWRPPEFARDILPNYFKHSNFS
SFVRQLNTYGFRKVVPERWEFANEFFRKGEKQLLCEIHRRKSAAATWPPFPPPPPPFFAPRHFAAGAFFRHGDGMLHGRL
GALVTTTERRHWFESAALPVAPSSRLLSQLGPVIAPARRAAATPEEEALMQENHRLLRGNAALVQELAHMRKLYSDIIYF
VQNHVRPVAPSPAAAAALHGLGVLRPPPAGGKAPASEVRGASGRSATSSSSLTVAEDQPTLLALRLPRTTEKIINEVSGG
NGGGSTKLFGVHLSSADEQTSSGASRKRSPPQEQPPTSPAPKRTLVVEHSELRLSIVSPP*
>OsHsf-B2b
MKGSRLAVKESCLPMTMPMPETFAQYSNPLRSTRAYGQLCRVPGRRRHACVDGWGQDRARTRGDDGQRRYAQCRGGWGDI
WRWGGYITCGSPRETGMVNGAPSPPPPSPMVMSFGPLDSPWVKQPDTTVYPGQICAAAGGGGGMADQTAAAVVVGGGAAA
TMGEPSPPPPAPAAEAAGVGVGQQQRTVPTPFLTKTYQLVDDPAVDDVISWNDDGSTFVVWRPAEFARDLLPKYFKHNNF
SSFVRQLNTYGFRKIVPDRWEFANDCFRRGERRLLCEIHRRKVTPPAPAATTAAVAAAIPMALPVTTTRDGSPVLSGEEQ
VISSSSSPEPPLVLPQAPSGSGSGGVASGDVGDENERLRRENAQLARELSQMRKLCNNILLLMSKYASTQQLDAANASSA
AGNNNNNNCSGESAEAATPLPLPAVLDLMPSCPGAASAAAPVSDNEEGMMSAKLFGVSIGRKRMRHDGGGDDDHAATVKA
EPMDGRPHGKDEQSAETQAWPIYRPRPVYQPIRACNGYEYDRAGSDQDECGAKPSNQDKKDLLRRWVVLISESLQLHGRQ
VVGAVQEWRRDRRGHRRPPAGHVQLRTCVNNLLVTGAGTLDAGREYETNSLPRPRR*
>OsHsf-B4c
MERCGSWSDCEAAAAAAQKAVPAPFLTKTYQLVDDPATDHIVSWGDDRVSTFVVWRPPEFARDILPNYFKHNNFSSFVRQ
LNTYGFRKVVPERWEFANEFFRKGEKQLLTEIHRRKTSSASTASPSPPPFFAPPHFPLFHHPGVAAAQHHHAFVGDDGVV
AAHGIGMPFPQPHWREPNLPVATRLLALGGPAPSPSSAEAGGAGRAATAAVLMEENERLRRSNTALLQELAHMRKLYNDI
IYFVQNHVRPVAPSPAAAAFLQGLGMQARKKPAAANVLNNSGGSTTSSSSLTIAEEPSPPPQQQHLAGEKSGGEAGNSSA
ARSSAPTKLFGVHLSAAPCGAGSKRASSPEEHPPTSPATKPRLVLECDDLSLTVAPSSSSQQQLSAASSPTSTS*
>OsHsf-B1
MAAAEAAAAVGKQQQKGGGGRGGGGGGPAPFLTKTNQMVEESATDEVISWGKEGRSFVVWKPVEFARDLLPLHFKHCNFS
SFVRQLNTYGFRKVVPDRWEFANGNFRRGEQGLLSGIRRRKATTPQSSKSCGSGVNVAFPPPLPPLPPEPSATTSSGNDR
SSSSASSPPRADITSENEQLRKDNQTLTMELARARRHCEELLGFLSRFLDVRQLDLRLLMQEDMRAAAGGVGGEQRVQEH
AREEKCVKLFGVLLDDTHGAATRKRARCEEAAASERPIKMIRIGEPWVSVPSSGPARCGGDN*
>OsHsf-B2c
MAEQGAGEADAGGGEPPPAAVMTAAAEALAGQRSLPTPFLTKTYQLVEDPAVDDVISWNEDGSTFVVWRPAEFARDLLPK
YFKHNNFSSFVRQLNTYGFRKIVPDRWEFANDCFRRGEKRLLCDIHRRKVVAAAAAAPPPPSPGMATAAAAVASGAVTVA
AAPIPMALPVTRAGSPAHSSEEQVLSSNSGSGEEHRQASGSGSAPGGGGGGSASGGDMGEENERLRRENARLTRELGHMK
KLCNNILLLMSKYAATQHVEGSAGISSIANCSGESSEAVPPPPPLPPAILDLMPSCPALATAAAAAGLAIDGEPDPSARL
FGVSIGLKRTRDDAAAAADEDGGGEDQAEHGGADVKPEAADPHPAGGGGGSSTEASPESHPWPIYRPTPMYHAVRPTCNG
PDRAGSDQDGSSSSQTMGPGEFDDLQKMMVVQQSNFVMHWGRSECGSGVRGFGW*
>OsHsf-A6a
MDPAAAGIVKEEMLESQQQQRQEDGGAAPRPMEGLHEVGPPPFLTKTYDLVEDPATDGVVSWSRAGNSFVVWDPHVFADL
LLPRLFKHNNFSSFVRQLNTYGFRKVDPDRWEFANEGFLRGQRHLLKTIKRRKPPSNAPPSQQQSLTSCLEVGEFGFEEE
IDRLKRDKNILITEVVKLRQEQQATKDHVKAMEDRLRAAEQKQVQMMGFLARAMRNPEFFQQLAQQKEKRKELEDAISKK
RRRPIDNVPFYDPGETSQTEQLDSPYLFDSGVLNELSEPGIPELENLAVNIQDLGKGKVDEERQNQTNGQAELGDDFWAE
LLVEDFTGKEEQSELDGKIDGIDELAQQLGYLSSTSPK*
