# Supplementary material for: Genome-wide identification, classification, and expression analysis of the HSF gene family in pineapple (Ananas comosus)
Source: PeerJ. 2021 Apr 27;9:e11329. doi: 10.7717/peerj.11329 (PMC8086565; doi:10.7717/peerj.11329)
Supplement: Supplemental Information 3 [file peerj-09-11329-s003.xlsx]

## Sheet: AtHSF protein
Table S3. The protein sequences of Arabidopsis HSFs.
>AtHsf-A1d
MDVSKVTTSDGGGDSMETKPSPQPQPAAILSSNAPPPFLSKTYDMVDDHNTDSIVSWSANNNSFIVWKPPEFARDLLPKN
FKHNNFSSFVRQLNTYGFRKVDPDRWEFANEGFLRGQKHLLQSITRRKPAHGQGQGHQRSQHSNGQNSSVSACVEVGKFG
LEEEVERLKRDKNVLMQELVRLRQQQQSTDNQLQTMVQRLQGMENRQQQLMSFLAKAVQSPHFLSQFLQQQNQQNESNRR
ISDTSKKRRFKRDGIVRNNDSATPDGQIVKYQPPMHEQAKAMFKQLMKMEPYKTGDDGFLLGNGTSTTEGTEMETSSNQV
SGITLKEMPTASEIQSSSPIETTPENVSAASEATENCIPSPDDLTLPDFTHMLPENNSEKPPESFMEPNLGGSSPLLDPD
LLIDDSLSFDIDDFPMDSDIDPVDYGLLERLLMSSPVPDNMDSTPVDNETEQEQNGWDKTKHMDNLTQQMGLLSPETLDL
SRQNP*
>AtHsf-B4a
MAMMVENSYGGYGGGGGERIQLMVEGQGKAVPAPFLTKTYQLVDDPATDHVVSWGDDDTTFVVWRPPEFARDLLPNYFKH
NNFSSFVRQLNTYGFRKIVPDRWEFANEFFKRGEKHLLCEIHRRKTSQMIPQQHSPFMSHHHAPPQIPFSGGSFFPLPPP
RVTTPEEDHYWCDDSPPSRPRVIPQQIDTAAQVTALSEDNERLRRSNTVLMSELAHMKKLYNDIIYFVQNHVKPVAPSNN
SSYLSSFLQKQQQQQPPTLDYYNTATVNATNLNALNSSPPTSQSSITVLEDDHTNHHDQSNMRKTKLFGVSLPSSKKRSH
HFSDQTSKTRLVLDQSDLALNLMTASTR*
>AtHsf-A8a
MVKSTDGGGGSSSSSSVAPFLRKCYDMVDDSTTDSIISWSPSADNSFVILDTTVFSVQLLPKYFKHSNFSSFIRQLNIYG
FRKVDADRWEFANDGFVRGQKDLLKNVIRRKNVQSSEQSKHESTSTTYAQEKSGLWKEVDILKGDKQVLAQELIKVRQYQ
EVTDTKMLHLEDRVQGMEESQQEMLSFLVMVMKNPSLLVQLLQPKEKNTWRKAGEGAKIVEEVTDEGESNSYGLPLVTYQ
PPSDNNGTAKSNSNDVNDFLRNADMLKFCLDENHVPLIIPDLYDDGAWEKLLLLSPSRKKTKKQENIVKKGKDDLTLEEE
EEDGTMELDKSYMLKLISEEMEKPDDFEFGQLTPERSRNLEILTEQMELLASNE*
>AtHsf-A2a
MEELKVEMEEETVTFTGSVAASSSVGSSSSPRPMEGLNETGPPPFLTKTYEMVEDPATDTVVSWSNGRNSFVVWDSHKFS
TTLLPRYFKHSNFSSFIRQLNTYGFRKIDPDRWEFANEGFLAGQKHLLKNIKRRRNMGLQNVNQQGSGMSCVEVGQYGFD
GEVERLKRDHGVLVAEVVRLRQQQHSSKSQVAAMEQRLLVTEKRQQQMMTFLAKALNNPNFVQQFAVMSKEKKSLFGLDV
GRKRRLTSTPSLGTMEENLLHDQEFDRMKDDMEMLFAAAIDDEANNSMPTKEEQCLEAMNVMMRDGNLEAALDVKVEDLV
GSPLDWDSQDLHDMVDQMGFLGSEP*
>AtHsf-B3a
MEDAGEHLRCNDNVNDEERLPLEFMIGNSTSTAELQPPPPFLVKTYKVVEDPTTDGVISWNEYGTGFVVWQPAEFARDLL
PTLFKHCNFSSFVRQLNTYGFRKVTTIRWEFSNEMFRKGQRELMSNIRRRKSQHWSHNKSNHQVVPTTTMVNQEGHQRIG
IDHHHEDQQSSATSSSFVYTALLDENKCLKNENELLSCELGKTKKKCKQLMELVERYRGEDEDATDESDDEEDEGLKLFG
VKLE*
>AtHsf-A1e
MGTVCESVATAKSSTAVMSSIPPFLSKTYDMVDDPLTDDVVSWSSGNNSFVVWNVPEFAKQFLPKYFKHNNFSSFVRQLN
TYGFRKVDPDRWEFANEGFLRGQKQILKSIVRRKPAQVQPPQQPQVQHSSVGACVEVGKFGLEEEVERLQRDKNVLMQEL
VRLRQQQQVTEHHLQNVGQKVHVMEQRQQQMMSFLAKAVQSPGFLNQFSQQSNEANQHISESNKKRRLPVEDQMNSGSHG
VNGLSRQIVRYQSSMNDATNTMLQQIQQMSNAPSHESLSSNNGSFLLGDVPNSNISDNGSSSNGSPEVTLADVSSIPAGF
YPAMKYHEPCETNQVMETNLPFSQGDLLPPTQGAAASGSSSSDLVGCETDNGECLDPIMAVLDGALELEADTLNELLPEV
QDSFWEQFIGESPVIGETDELISGSVENELILEQLELQSTLSNVWSKNQQMNHLTEQMGLLTSDALRK*
>AtHsf-A6b
MDPSFRFIKEEFPAGFSDSPSPPSSSSYLYSSSMAEAAINDPTTLSYPQPLEGLHESGPPPFLTKTYDLVEDSRTNHVVS
WSKSNNSFIVWDPQAFSVTLLPRFFKHNNFSSFVRQLNTYGFRKVNPDRWEFANEGFLRGQKHLLKNIRRRKTSNNSNQM
QQPQSSEQQSLDNFCIEVGRYGLDGEMDSLRRDKQVLMMELVRLRQQQQSTKMYLTLIEEKLKKTESKQKQMMSFLARAM
QNPDFIQQLVEQKEKRKEIEEAISKKRQRPIDQGKRNVEDYGDESGYGNDVAASSSALIGMSQEYTYGNMSEFEMSELDK
LAMHIQGLGDNSSAREEVLNVEKGNDEEEVEDQQQGYHKENNEIYGEGFWEDLLNEGQNFDFEGDQENVDVLIQQLGYLG
SSSHTN*
>AtHsf-A7a
MMNPFLPEGCDPPPPPQPMEGLHENAPPPFLTKTFEMVDDPNTDHIVSWNRGGTSFVVWDLHSFSTILLPRHFKHSNFSS
FIRQLNTYGFRKIEAERWEFANEEFLLGQRQLLKNIKRRNPFTPSSSPSHDACNELRREKQVLMMEIVSLRQQQQTTKSY
IKAMEQRIEGTERKQRQMMSFLARAMQSPSFLHQLLKQRDKKIKELEDNESAKRKRGSSSMSELEVLALEMQGHGKQRNM
LEEEDHQLVVERELDDGFWEELLSDESLASTS*
>AtHsf-A7b
MDPSSSSRARSMPPPVPMEGLQEAGPSPFLTKTFEMVGDPNTNHIVSWNRGGISFVVWDPHSFSATILPLYFKHNNFSSF
VRQLNTYGFRKIEAERWEFMNEGFLMGQRDLLKSIKRRTSSSSPPSLNYSQSQPEAHDPGVELPQLREERHVLMMEISTL
RQEEQRARGYVQAMEQRINGAEKKQRHMMSFLRRAVENPSLLQQIFEQKRDREEAAMIDQAGLIKMEEVEHLSELEALAL
EMQGYGRQRTDGVERELDDGFWEELLMNNENSDEEEANVKQD*
>AtHsf-B2b
MPGEQTGETPTVAGVGGGGAGCSAGNSGGSSGCGAGGGGGGSGGGGGGGGDSQRSIPTPFLTKTYQLVEDPVYDELISWN
EDGTTFIVWRPAEFARDLLPKYFKHNNFSSFVRQLNTYGFRKVVPDRWEFSNDCFKRGEKILLRDIQRRKISQPAMAAAA
AAAAAAVAASAVTVAAVPVVAHIVSPSNSGEEQVISSNSSPAAAAAAIGGVVGGGSLQRTTSCTTAPELVEENERLRKDN
ERLRKEMTKLKGLYANIYTLMANFTPGQEDCAHLLPEGKPLDLLPERQEMSEAIMASEIETGIGLKLGEDLTPRLFGVSI
GVKRARREEELGAAEEEDDDRREAAAQEGEQSSDVKAEPMEENNSGNHNGSWLELGK*
>AtHsf-A5a
MNGALGNSSASVSGGEGAGGPAPFLVKTYEMVDDSSTDQIVSWSANNNSFIVWNHAEFSRLLLPTYFKHNNFSSFIRQLN
TYGFRKIDPERWEFLNDDFIKDQKHLLKNIHRRKPIHSHSHPPASSTDQERAVLQEQMDKLSREKAAIEAKLLKFKQQKV
VAKHQFEEMTEHVDDMENRQKKLLNFLETAIRNPTFVKNFGKKVEQLDISAYNKKRRLPEVEQSKPPSEDSHLDNSSGSS
RRESGNIFHQNFSNKLRLELSPADSDMNMVSHSIQSSNEEGASPKGILSGGDPNTTLTKREGLPFAPEALELADTGTCPR
RLLLNDNTRVETLQQRLTSSEETDGSFSCHLNLTLASAPLPDKTASQIAKTTLKSQELNFNSIETSASEKNRGRQEIAVG
GSQANAAPPARVNDVFWEQFLTERPGSSDNEEASSTYRGNPYEEQEEKRNGSMMLRNTKNIEQLTL*
>AtHsf-A1a
MFVNFKYFSFFIRTKMDGVTGGGTNIGEAVTAPPPRNPHPATLLNANSLPPPFLSKTYDMVEDPATDAIVSWSPTNNSFI
VWDPPEFSRDLLPKYFKHNNFSSFVRQLNTYGFRKVDPDRWEFANEGFLRGQKHLLKKISRRKSVQGHGSSSSNPQSQQL
SQGQGSMAALSSCVEVGKFGLEEEVEQLKRDKNVLMQELVKLRQQQQTTDNKLQVLVKHLQVMEQRQQQIMSFLAKAVQN
PTFLSQFIQKQTDSNMHVTEANKKRRLREDSTAATESNSHSHSLEASDGQIVKYQPLRNDSMMWNMMKTDDKYPFLDGFS
SPNQVSGVTLQEVLPITSGQSQAYASVPSGQPLSYLPSTSTSLPDTIMPETSQIPQLTRESINDFPTENFMDTEKNVPEA
FISPSPFLDGGSVPIQLEGIPEDPEIDELMSNFEFLEEYMPESPVFGDATTLENNNNNNNNNNNNNNNNNNNNTNGRHMD
KLIEELGLLTSETEH*
>AtHsf-A4a
MDENNHGVSSSSLPPFLTKTYEMVDDSSSDSIVSWSQSNKSFIVWNPPEFSRDLLPRFFKHNNFSSFIRQLNTYGFRKAD
PEQWEFANDDFVRGQPHLMKNIHRRKPVHSHSLPNLQAQLNPLTDSERVRMNNQIERLTKEKEGLLEELHKQDEEREVFE
MQVKELKERLQHMEKRQKTMVSFVSQVLEKPGLALNLSPCVPETNERKRRFPRIEFFPDEPMLEENKTCVVVREEGSTSP
SSHTREHQVEQLESSIAIWENLVSDSCESMLQSRSMMTLDVDESSTFPESPPLSCIQLSVDSRLKSPPSPRIIDMNCEPD
GSKEQNTVAAPPPPPVAGANDGFWQQFFSENPGSTEQREVQLERKDDKDKAGVRTEKCWWNSRNVNAITEQLGHLTSSER
S*
>AtHsf-B1a
MTAVTAAQRSVPAPFLSKTYQLVDDHSTDDVVSWNEEGTAFVVWKTAEFAKDLLPQYFKHNNFSSFIRQLNTYGFRKTVP
DKWEFANDYFRRGGEDLLTDIRRRKSVIASTAGKCVVVGSPSESNSGGGDDHGSSSTSSPGSSKNPGSVENMVADLSGEN
EKLKRENNNLSSELAAAKKQRDELVTFLTGHLKVRPEQIDKMIKGGKFKPVESDEESECEGCDGGGGAEEGVGEGLKLFG
VWLKGERKKRDRDEKNYVVSGSRMTEIKNVDFHAPLWKSSKVCN*
>AtHsf-A3a
MSPKKDAVSKPTPISVPVSRRSDIPGSLYVDTDMGFSGSPLPMPLDILQGNPIPPFLSKTFDLVDDPTLDPVISWGLTGA
SFVVWDPLEFARIILPRNFKHNNFSSFVRQLNTYGFRKIDTDKWEFANEAFLRGKKHLLKNIHRRRSPQSNQTCCSSTSQ
SQGSPTEVGGEIEKLRKERRALMEEMVELQQQSRGTARHVDTVNQRLKAAEQRQKQLLSFLAKLFQNRGFLERLKNFKGK
EKGGALGLEKARKKFIKHHQQPQDSPTGGEVVKYEADDWERLLMYDEETENTKGLGGMTSSDPKGKNLMYPSEEEMSKPD
YLMSFPSPEGLIKQEETTWSMGFDTTIPSFSNTDAWGNTMDYNDVSEFGFAAETTSDGLPDVCWEQFAAGITETGFNWPT
GDDDDNTPMNDP*
>AtHsf-A1b
MESVPESVPSPNSNTPSIPPPVNSVPPFLSKTYDMVDDPLTNEVVSWSSGNNSFVVWSAPEFSKVLLPKYFKHNNFSSFV
RQLNTYGFRKVDPDRWEFANEGFLRGRKQLLKSIVRRKPSHVQQNQQQTQVQSSSVGACVEVGKFGIEEEVERLKRDKNV
LMQELVRLRQQQQATENQLQNVGQKVQVMEQRQQQMMSFLAKAVQSPGFLNQLVQQNNNDGNRQIPGSNKKRRLPVDEQE
NRGDNVANGLNRQIVRYQPSINEAAQNMLRQFLNTSTSPRYESVSNNPDSFLLGDVPSSTSVDNGNPSSRVSGVTLAEFS
PNTVQSATNQVPEASLAHHPQAGLVQPNIGQSPAQGAAPADSWSPEFDLVGCETDSGECFDPIMAVLDESEGDAISPEGE
GKMNELLEGVPKLPGIQDPFWEQFFSVELPAIADTDDILSGSVENNDLVLEQEPNEWTRNEQQMKYLTEQMGLLSSEAQR
K*
>AtHsf-A6a
MDYNLPIPLEGLKETPPTAFLTKTYNIVEDSSTNNIVSWSRDNNSFIVWEPETFALICLPRCFKHNNFSSFVRQLNTYGF
KKIDTERWEFANEHFLKGERHLLKNIKRRKTSSQTQTQSLEGEIHELRRDRMALEVELVRLRRKQESVKTYLHLMEEKLK
VTEVKQEMMMNFLLKKIKKPSFLQSLRKRNLQGIKNREQKQEVISSHGVEDNGKFVKAEPEEYGDDIDDQCGGVFDYGDE
LHIASMEHQGQGEDEIEMDSEGIWKGFVLSEEEMCDLVEHFI*
>AtHsf-A4c
MDENNGGSSSLPPFLTKTYEMVDDSSSDSVVAWSENNKSFIVKNPAEFSRDLLPRFFKHKNFSSFIRQLNTYGFRKVDPE
KWEFLNDDFVRGRPYLMKNIHRRKPVHSHSLVNLQAQNPLTESERRSMEDQIERLKNEKEGLLAELQNQEQERKEFELQV
TTLKDRLQHMEQHQKSIVAYVSQVLGKPGLSLNLENHERRKRRFQENSLPPSSSHIEQVEKLESSLTFWENLVSESCEKS
GLQSSSMDHDAAESSLSIGDTRPKSSKIDMNSEPPVTVTAPAPKTGVNDDFWEQCLTENPGSTEQQEVQSERRDVGNDNN
GNKIGNQRTYWWNSGNVNNITEKAS*
>AtHsf-A9a
MTAIPNVVDIESSSSSLCQETATETVTVERGSSDSSSKPDDVVLLIKEEEDDAVNLSLGFWKLHEIGLITPFLRKTFEIV
DDKVTDPVVSWSPTRKSFIIWDSYEFSENLLPKYFKHKNFSSFIRQLNSYGFKKVDSDRWEFANEGFQGGKKHLLKNIKR
RSKNTKCCNKEASTTTTETEVESLKEEQSPMRLEMLKLKQQQEESQHQMVTVQEKIHGVDTEQQHMLSFFAKLAKDQRFV
ERLVKKRKMKIQRELEAAEFVKKLKLLQDQETQKNLLDVEREFMAMAATEHNPEPDILVNNQSGNTRCQLNSEDLLVDGG
SMDVNGRIEIE*
>AtHsf-B2a
MNSPPVDAMITGESSSQRSIPTPFLTKTFNLVEDSSIDDVISWNEDGSSFIVWNPTDFAKDLLPKHFKHNNFSSFVRQLN
TYGFKKVVPDRWEFSNDFFKRGEKRLLREIQRRKITTTHQTVVAPSSEQRNQTMVVSPSNSGEDNNNNQVMSSSPSSWYC
HQTKTTGNGGLSVELLEENEKLRSQNIQLNRELTQMKSICDNIYSLMSNYVGSQPTDRSYSPGGSSSQPMEFLPAKRFSE
MEIEEEEEASPRLFGVPIGLKRTRSEGVQVKTTAVVGENSDEETPWLRHYNRTNQRVCN*
>AtHsf-C1a
MEDDNSNNNNNNNVIAPFIVKTYQMVNDPSTDWLITWGPAHNSFIVVDPLDFSQRILPAYFKHNNFSSFVRQLNTYGFRK
VDPDRWEFANEHFLRGQKHLLNNIARRKHARGMYGQDLEDGEIVREIERLKEEQRELEAEIQRMNRRIEATEKRPEQMMA
FLYKVVEDPDLLPRMMLEKERTKQQQQVSDKKKRRVTMSTVKSEEEEVEEDEGRVFRVMSSSTPSPSSTENLYRNHSPDG
WIVPMTQGQFGSYETGLVAKSMLSNSTSSTSSSLTSTFSLPESVNGGGGGGCGSIQGERRYKETATFGGVVESNPPTTPP
YPFSLFRGGF*
