# Supplementary material for: Genome-wide identification, classification, and expression analysis of the HSF gene family in pineapple (Ananas comosus)
Source: PeerJ. 2021 Apr 27;9:e11329. doi: 10.7717/peerj.11329 (PMC8086565; doi:10.7717/peerj.11329)
Supplement: Supplemental Information 4 [file peerj-09-11329-s004.xlsx]

## Sheet: PtHSF protein
Table S4. The protein sequences of Populus trichocarpa HSFs.
>PtHsf-B2b
MPPLPVEQTGESPAACGGGAAAGGPPSGSGDSQRSLPTPFLTKTYQLVDDPSVDDLISWNDDGSTFIVWRPAEFARDLLP
KYFKHNNFSSFVRQLNTYGFRKVVPDRWEFANDCFRRGEKALLRDIQRRKISTMAASAVTSASVTVAAIPTVARAVSPAN
SGDDQGISSTSSPGGAGTAGGANSFLRTTSCTTTPEILEENERLRKENSALSHELTQLRGLCNNIMVLMNNYASPQLEGN
SGNSNNNLAEVKAALELLPVADEVAVSGRPRGGAAATESEVSPRLFGVSIGFKRVRIDEEEEEEGNRQQTEGKEHESDVK
AEPLDGSSGNSDHQDQRWLDLGK*
>PtHsf-A1c
KRKGQKGNRLVTVSARRVDSSIKSHPTDHFLDRTIITTCLILTSPHLPLLFPLLQSRVYVLTNVCPSKTLRNSPTYQSAS
IHVTLMDGINTTASGGDASTSGGVALAAPVPMASQSNSPPPFLSKTYDMVDDPETDAVVSWSSTNNSFVVWNPPEFARDL
LPKYFKHNNFSSFVRQLNTYGFRKVDPDRWEFANEGFLRGQKHLLRTISRRKPAHGHTNQQPQQARGQNSTVGACVEVGK
FGLEEEVERLKRDKNVLMQELVRLRQQQQSTDSQLQTMVQRLQGMEQRQQQMMSFLAKAMQSPGFLAQFVQQQNESSRRI
TEANKKRRLKPEDVSENEGSSAPDGQIVKYQPQMNEAAKAMLRQVMKMDAPSRLESYDTNLDGFLIGNGSPSSSAKDSGS
SSSRMSGVTLQEVPAASGISGHGPMAAISEIQSSPHIASSEKATASQFPESILVGGQGAPSIPIPQADIIMPQVSQKPEM
VPEIIADIPGEDYMEPETSSDVFLDPASLGINDTIPIDIDNISPDPDIDALLDNSSFWDDLLAQSPVPEDIESSSVEGKA
NGNDVHQIINGWDKAQHMDQLTEQMGLLSSDRKQL*
>PtHsf-B4d
MAFTVDRCEEMVFTVESQKAVPAPFLTKTYQLVDDPLTDHIVSWGDDETSFVVWRPPEFSRDLLPNYFKHNNFSSFVRQL
NTYGFKKVVADRWEFANEYFRKGAKHLLSEIHRRKTSQHHHQHYPEQPPQFFQPEDGFSWIDPPFQSPKSSTDILTALSE
DNQRLRRKNCMLLSELSHMKNLYNDIIYFIQNHVKPMPYEQKAYNAAPKLIELGSSCQDQTICSSIQRAKNGTVLGQHSL
TLSTEESTSPVKLFGVPLSGNKRLHPEVID*
>PtHsf-A5b
MEAGPSSATSGGGGGGGGGPAPFLVKTYDMVDDSSTDEIVSWSSNKNSFVVWNPPEFARLLLPTFFKHNNFSSFIRQLNT
YGFRKIDPERWEFANEDFVKDQKHLLKNIYRRKPIHSHSQPQGSLVDPERAAYEEEIEKLARDKAKLKASILGFEQQRSS
AKLQVEDLTQKIDTMQQRQEKLLSFLEKAVQNPTFVEHLARKIEAMDFSAYSKKRRLPQVDHPMPIAENSLVENHSSSRP
ESNVIHQDFPDKLRLELSPAVSDINLVSHSTQSSNEDGGSPQRKISEGNPKDALTRTSGLLLAPETLELSDTGASYAFKV
NPAVPRDIPANGSPALHSLQSNLTSNEEVDGHISCQLNLSLASSPLQVNKNPYLTRIPQLGQEIGKSPESRFNESNKDSD
IRVSQNNMNLGNEVRALSNSQETPNNNQAPASAPVRVNDVFWEQFLTERPGYSDNEEASSNYRANPYDERERRIGFGVPR
NAKNMEQLSL*
>PtHsf-A7b
MNPYLTVKQEYAGSSLLPLSGGDEPPTMMLPPQPMEGLHDTGPPPFLTKTFDMVDDPMTNHIVSWSRGGFSFVVWDPYSF
SANLLPRYFKHNNFSSFVRQLNTYGFRKIDPDRWEFANEGFLRGQKQLLRNIKRRKAASQPLSQQQAPDACVEVSRFGLD
GEIDLLKRDRHVLMMELAKLRQQQQKARSYIQAMEQRLQGTEQKQQQMMQFLARAMQNPAFLLQLVQQKGKRKELEEAMT
KKRRIPVDQRPSRSGGGESNRIDESANPIKAEALEYGDYGFEVSELEALALEMQGYGRARREQEDGVEELEPLESGDREL
DEGFWEELLNESAGGGEDEDVNTLAERLGYLRSSPKYRN*
>PtHsf-B4a
MALMLDNCEGILLSLDSHKSVPAPFLTKTYQLVDDPATDHIVSWGEDDTTFVVWRPPEFARDLLPNYFKHNNFSSFVRQL
NTYGFRKIVPDRWEFANEFFKKGEKHLLCEIHRRKTAQPQVAINQHHPHSPFGVNGPSFFPFPSRTSISPSDSDEQANNW
CDSPPLTSPPRGGVATATVIGGGGGFNSSVSALSEDNERLRRSNNMLMSELAHMKKLYNDIIYFVQNHVKPVAPSNSYSS
SLLLCGPSPYATTNHVTSNGSLVQKPLNQLLGYYPTTAPTNPKQIPQVHVLINSPTTTSQSSLTILEEANNNGCKTKLFG
VSLQTKKRLHPEYGSNPGNMETSKARLVLDKDDLGLNLMPLSRC*
>PtHsf-A1a
MDGTINSASGGDSSISGGGAQAASVPMASQSNAPPPFLSKTYDMVDDPATDAVVSWSSTNNSFVVWNPPEFARDLLPKYF
KHNNFSSFVRQLNTYGFRKVDPDRWEFANEGFLRGQKHLLRIISRRKPAHGHANQQPQQPHGQNSSVAACVEVGKFGLEE
EVERLKRDKNVLMQELVRLRQQQQSTDSQLQTMVQRLQGMEQRQQQMMSFLAKAMNSPGFLAQFVQQQNDNNRRITEANK
KRRLKQEDVPENEGSGSHDGQIVKYQPLMNEAAQAMLRQIMKMDASSKLESYDNNLGAKDSGSSSSHTSGVTLQEVLPTS
GQSAHIPAAFGISRQGPSAPISEIQSSLQIASSEKVTASQFPDISMPVGAQGATSIPIPQADVIMPHVSQMLEMVPENVA
DIPCEDYMEPETCNDGFIDLASLGINGIPIDIDNISPDPDIDALLDNSSFWDDLLVQSPEHEDIESSSVEGKANGNDVQP
NANGWDKAQHVDQLTEQMELLTSDKKL*
>PtHsf-B5a
MAANLLQLDPGTTSKNSSSSNIKSPKTKCPAPFLSKTYDLIEEGGADGVVDHPHGKRIVSWNADGDGFIVWSPAEFSELT
LPRFFKHNNFSSFIRQLNTYGFKKTSSKQWEFKHEKFLRGRRHLLVEITRKKCEPSTFPAYLEASNRESATLAMEESNRL
ILMEENRNLRREKMELEIQIAQFKALEMKLLDCLTQDMGSHQNKTRRLC*
>PtHsf-A4c
MDESQGSPNSLPPFLAKTYEMVDDPSTDPIVSWSQSNKSFTVWDPPEFARDLLPRFFKHNNFSSFIRQLNTYGFRKIDPE
QWEFANEDFIRGQPFLMKNIHRRKPVHSHSLQNLQGQGSNLLTDSERQSMKDDIERLKRDKEALILELQMQEQERKGFEM
QIEGLKEKLQQMERRQQTMVSFVTRVMPKPGLALNLMPQLEGHDRKRRLPRIGCLHSEASSNEDNQTVTSQALSRENADG
NSFALLNMEQFEQLESSLTFWENMVNDVVQTHSHNTKTIEMDESTSGAESPAISCAQLIFDFRPKTPGIDMNSEPSIAVV
PEPVSPKEQPAGTAPAVATGVNDVFWEQFLTENPGSTDTQEVQSERKDSDGRKNEIKPGDPRKFWWDMRNVNNLTEQMGH
LTPAERT*
>PtHsf-A7a
MNPFFTVKQEYAGSSSSPPSGGDEPPPVMLPPQPREGLHDTGPPPFLTKTFDMVDDPTTNHIVSWNRGGSSFVAWDPHSF
STNLLPRYFKHNNFSSFVRQLNTYGFRKIDPDRWEFANEGFLSGQKHLLRNIKRRKAPSQPLTQQQAPDACVEVGRFGLD
GEIDRLRRDKQVLMMELVKLRQQQQNARSYIQAMDQRLQAIEQKQQQMMQFLARAMQNPAFLQQLVQQKEKRKELEEAMT
KKRRRPIDQGSSRGGGGRRGGESSHIGGSANPIKAEPLESGDLEFEVSELEALALEMQGYGRARREQEDGVEELETPESK
DRELDEGFWEELLNESAGGDEDDVNTLAERLGYLGSSPK*
>PtHsf-B3a
MADDKGLLEYVRKSTPPPFLLKTYMLVEDLATDDVISWNGEGTGFVVWQPAEFSRDLLPTLFKHSNFSSFVRQLNTYGFR
KVATSRWEFCNDMFRKGERELLRQIRRRKAWTNKQQPIAPLIQVAPQEFEEDQRSSSTLSSSEYTSLVDENKRLKKENGV
LSTELTSMKRKCKELLDLVAKNAHLEKEEEDERPKLFGVRLEVEGEREKKRKRAEIRESATILLSQ*
>PtHsf-A3
MPRPLVCLQENPVPPFLSKTYDLVDDRMLDPIISWGSIGESFVVWDPEEFARLVLPRNFKHNNFSSFVRQLNTYGFRKID
TDRWEFANESFRRGEKHLLKNIHRRKSTQSQQVGSHTGSLTEAGRSGLDSEVERLRKERSVMMQEVIELQKQQSGTVHDV
QSVNQRLQAAEQRQKQMVSFLAKLFQNPAFLARLKQKKQQGEIGSSRMKRKFVKHQQHQHALPESSMEGQIMRYMPDWRN
ITLSSVVPDTSPASIDQSPDYLSEGMVGLGLGSEAMPLPEIVAPDEFAISDELGLGQGFIKTPEQVGEGQSSMQFEDPKL
KGKIDMSPQNEAGLEYFVSFPEDLGMEKSFPELSSPGMERIVKQEDVWSLAFNTSAGMSSSSNVPWDNFFGYDMPELGST
GGFSDIWDIGSGQAGGGLSMDKWLADESPVDESDSQAGQPKDDK*
>PtHsf-A9
MNTREMQKAAAVLEVEEEKRIKATAVTVKEEDDDGVDSLNELKGGGGGGNNKNNNGISSSSCSSVDLPKPMEGLHEAGPP
PFLKKTFEMVGDPETDETVSWGKNRDSFVVWDSHEFSKNLLPKYFKHSNFSSFIRQLNTYGFRKIDPDRWEFANEGFHGA
KKHLLKTIKRRSRYNKQQSGAVTGVNDSTKPRLEAELENLKDDQDVLRLEILKIRQKQQESQTQLSAVEERIQAAECKQL
QMFIFFTKAARNPGFIQQLIQKRKQKGKVDGIEFCKKRRLLQTHLPESFPAAVDTNQSVHFKNHAQEQLATMQTEITEIL
TEDVETCQMLKVFPAPMSDGFCCPILQDHNANIMCEKSTQDMSSAYNLMSEKLLDDGSVIEDLVDEEVDVNDSKLYLELE
DLIGMPRMWGGFATELVGHTAGCVGSIPRL*
>PtHsf-A2
MEGVVVKEEETVTCTGGGASSSSSSSSFSPHPMEGLNEVGPPPFLTKTYEMVEDPSTDTVVSWSGGRNSFIVWDSHKFST
TLLPKHFKHSNFSSFIRQLNTYGFRKVDPDRWEFANEGFLGGQKHLLKTIKRKRHLSQTTQQQGGGACIELGQFEFEGEL
ERLKRDRNVLMAEIVRLRQQQQQSREHIAAMEDRLRSTERKQQRVMTFLAKALNNPSFIEQFAQRAAQRREIRGVEIGRK
RRLTASPSVENLQEVASVALGSSQFVDYMNQDLPTIENEMETLFSAVLDNESSSDIKDPIASSMDTASGGSTLDAVNETI
WEELLTDDLVSGEPNEVVVSDEPEVDVEVEDLVAKPVDWSDDFQDLVDQMGYLRPERQQRIFRRGVWI*
>PtHsf-B1
MAQRSAPAPFLTKTYQLVDDPSTDDVISWNETGTTFVVWKTADFAKDLLPNYFKHNNFSSFVRQLNTYGFRKIVPDKWEF
ANENFRRGQKELLAEIRRRKTAAASPTTQTSPAGKSGGASSSSNSGEDLGSTSTSSPDSKNPGSVETAATQVADLSIENE
QLKKDNDVLSSELEQAKKQCGELINFLTEYVKVSPDQINRIIGCGGSTCNGEADVGDNQSEDDDDDENTSDETDHDDTDH
DGDGGEGGGLKLFGVLLKCQNKKKRGRDEKMGLGGARAKEIKICN*
>PtHsf-A8a
MVKSSDSGVAPFLKKCYEMVGDESTNSIISWSQTNDSFVIWDMTEFCVHLLPKYFKHSNSSSFVRQLNIYGFRKIDTDHWEF
ANDGFIRGQKHLLKNISRRKNSQGTDNRKLVQQQDNSVEHHESVENAGLWKEVENLKTGKIALTQELVKLSQHQETADNKLLLLRDRLQGMEKNQQQMLS
FLVMAMQKSPGFLAQLLHKKENNWRMAEPGSIVEQVADDADPLASEGMIVKYQPPVDETFEPMHAPPIGPENPRESNPSSDGMKDFFFSSEFTELLMDEN
LGFENHAPFVLPELADDGAWEQLLLANPFVANIKDSETDYEEPTDAETDTGTAVPGTQLDRSQDFENLIEQMEKYHNLENQATDEGPHFEKPRNLEILTK
QMGLLASETNH*
>PtHsf-A6b
MASTAIPQPMEGLRDSVPPPFLTKTYDIIEDASTNHIVSWSRGNNSFIIWDPQAFSTSLLPRYFKHNNFSSFVRQLNTYG
FRKVDPDRWEFANEGFLRGKKHLLKSIRRRKAPQTLTSQACVEVGTFGLDGEVNRLRRDKQVLMVELVKLRQQQQTTKAC
IQLIERKLKRTENKQQQMMSFLARAMQNPNFVQQLAQQKEMRKELEEAISKKRRRPIDQGRSNFEVAEFGHGEGVGTFVK
IEHQEFGDLSEFDDLSEFDVPEFHNPAMNMQGLSENQLINLVEERIEKGEEHGNKGNEIDEGFWEDLLNEDIIDEEIAVL
GSEGEDEEDVSVLVEQLGYLGSSTELRT*
>PtHsf-B4b
MAFTVDRCEEMVFTVESQKAVPAPFLTKTYQLVDDPLTDHVVSWGDDETTFVVWRPPEFARELLPNYFKHNNFSSFVRQL
NTYGFKKVVTDRWEFANEYFRKGAKQLLSEIHRRKTISQHHHQHYPDQATQFLQSEDHGFGWIDPPFPSPKPNVDHILTA
LSEDNQKLRRKNCMLLSELSHMKNLYNDIIYFIQNHVKPVPNEQKAYNTVPKLIEPGSSCQDQTICFGVQRAKNGVLGKH
SLTFSTEESSSPVKLFGVPLIDNKRLHPEAIE*
>PtHsf-A6a
MNRRGRAIKEEYAGGSSSTYSSGMASTAIPQPMEGLHDPGPPPFLTKTYDIIEDSSTNHIISWSRGNNSFVVWDPQAFSI
SLLPRYFKHNNFSSFVRQLNTYGFRKVDPDRWEFANEGFLRGKKHLLKTVRRRKAPQTQTSQQALEACVEVGTFRLDGEV
DRLSRDKQVLMVELVKLRQQQQTTRACLQLMEQRVKRNENKQQHMMSFLARAMQNPTFVQQLVQQKDMMKELEEEISKKK
RRPIDQGRNNVEVGEFGHGEGVGTFVKIEPREFGGFSEFEVPEFVNLAMNMQELNENQLINLDEECIEKGEEYENNGKDF
DEAFWEDLLNEDIGEQGEDEEDVNVLVEQLGYLGYSPK*
>PtHsf-A8b
MVKSSESGVAPFLKKCYEMVDDESTNSIISWSQTNDSFVIWDMTEFSVHLLPKYFKHSNSSSFVRQLNIYGFRKIDTDQW
EFANDGFIRGQKHLLKNICRRKNSQGTDNRKSVQQQDNSIEHCENVENVGLWKEVESLKTGRNAVTQELVKLRQHQETAD
NKLLLLRDRLQGMEKNQQQMLSFLVMAMQSPGFLAQLLNKKENNWRIAEPGSIVEQGADDAEQLASEGMIVRYQPPVDEM
FEPVHAPPIGPENPRESNPSSDGMKDFFVSPDFMELLMDENLGFENHTSFGLPELADDGSWEQLLLANPFIENIKDTKPG
SEESTDPETDTGTTIVGTQLERSQSFEYLIEMMEKSNDLENKATDEGPHFEKSQKLEILTEQMGLLASEPNH*
>PtHsf-B5b
MAATFSQLDQDTTSKSSSSNTRSPRTRSPAPFLSKTYDLLEEGGAHDSVDDHPHGKRVVSWNAEGNGFVVWSPAEFSELT
LPRYFKHSNFSSFIRQLNTYGFKKTSSKQWEFKHEKFQKGRRHMLVEIIRKKCEPSMFPAYLKASSNQQNAIIDMEETNC
LTLMAENKNLRREKLELQIQIAQFKALETKLLDCLTQYNIGNHQNKTRRLC*
>PtHsf-A4a
MDESQGTSNSLPPFLAKAYEMVDDPSSDSIVSWSQNNKSFVVWNPPEFARDLLPRFFKHNNFSSFIRQLNTYGFRKIDPE
QWEFANEDFIRGQPHLMKNIHRRKPVHSHSMQNLQGQGSNLLTDSERQSMKDDIEKLKRDKQALILELQKQEQERKGFEM
QIEGLKEKLQQTECIQQTIVSFVARVLPKPGLALNIMPQLEGRDRKRRLPRIGYLYSEASNEDNQMVTSQALSRENADSN
SVALLNMEQFEQLESSLTFWENMVHDIGQTYNYNNSTIEMDDSTSGAQSPAISCVHLNVDFRPKSPGIDMNSEPSAAVAP
EPVSPKEQLAGTAPTVATGVNDVFWEQFLTENPGSTNAQEVQSERKDSDGRKGEIKPVDPGKFWWNMRNVNNLTEQMGHL
TPAERT*
>PtHsf-B2a
MSPPPLVEQNSTDTPTTGGGETSRTIPTPFLTKTYQIVDDHTIDDVVSWNEDGSSFIVWDPTVFARDLLPKYFKHNNFSS
FVRQLNTYGFRKVVPDRWEFSNESFRRGEKNLLANIQRRKIPAVVTAPAAVVPAMVKTSSNSSSDEQVISRSSSPGLSVD
LIDENERLRKENVQLKGELTEMKSLCANIFSLVSTYANSREGKGVRKMLDLLPMKEEEREGARIFGVEVGVKRGREGSGD
MEEGEAEGEEDGMQLQLRQPGCGGGLKIETNGCQDGNSNGGGDQDAPWLEQCHRLNQKMCD*
>PtHsf-A1b
MIRMDSGNNNTNTVPPFLSKTYDMVDDPSTDSVVSWSSSNNSFVVWNVPEFQTDLLPKYFKHSNFSSFVRQLNTYGFRKV
DPDRFEFANEGFLRGQKHLLRSISRKKPVHGNLPPQVQSSSVTTCVEVGKSGLEEEVERLKRDKNVLMQELVRLRQQQQA
TDHQLHTVGQRVQGMEQRQQQMMSFLAKAMQNPGFLSQLVQQQNESNRRIAGASKKRRLPRQEEENLAGVQCKTSPNGQI
IKFHSSMNEAAKAMLHQILKMNSSPRLEPSMNNSGPLLIGNHPSSNGLDSGSSSTRMSGVMLSEVPTASGPSYLPMETGF
PASHSTTAISEVQSPASVATDYVKTDYTAEMGMHNSGQNTILPNFTAMTGIVPGGSAGGPNMNIAGSEKGNAEFFDTMSS
VLDAPVPIETEALSPSQDEEVFLDGNHKLPGINDVFWEQFLTASPLNGETDEINSSSPESSMSKEQELQSWQDNGWDNIQ
HMNRLAEQMGLLTPESLKG*
>PtHsf-B4c
MALMLDNCEGILLSLDSHKSVPAPFLTKTYQLVDDPATDHIVSWGEDDTTFVVWRPPEFARDLLPNYFKHNNFSSFVRQL
NTYGFRKIVPDRWEFANEFFKKGEKHLLCEIHRRKTAQPQVAINQHHHHQHHPHSPFGVNGPSFFPFSSRTSISPSDSDE
QANNNWCDSPPLTSPPRGVASATVIGGGGGYNSSVFALSEDNERLRRSNNMLMSELAHMKKLYNDIIYFVQNHVKPVAPS
NSYSSSLLLCGPAPYATANPVTSNGSLAQKPLNQLLGYYPTTAPNNPKQAPQVHVLNSPTTTSQSSLTFLEEANNNGCKT
KLFGVPLHSKKRLHPEYGSNPGNMETNKARMVLDKDDLGLNLMPPSRC*
>PtHsf-A4b
MDGSQSNSSNAPPPFLTKTYDMVDDPLTNSVVSWSHSGCSFVVWNPPEFAQDLLPKYFKHNNFSSFVRQLNTYGFRKIDP
DQWEFGNEEFIRGQRHILKNIHRRKPVHSHSMQNHGIISPLAETEKQEYEKEINRLKHDKNELELELQRNEAEKQGFEFQ
IVSLGERLQSMECRQKQLMSFLGQLMRKPEFASLLMQQSEYHNKKRKLLKLDYFQGDYKEENENLCSPIANLDGLPAPML
HPESVEKLDSSLKFLEDFLYAVGESFSEEVCHVGVRSQPSMVIVRELSSSSADGEPWSPRSFPSSPHSRDIRSSPELARC
INNVVRQTTPSYLGDDTMPESSQLQANCKHSRAPASEVIKAPALEMKSPTVVNGANDLFWQHFLTEAPGPHDGQESEGRT
ERRITDDIRSNTKPDSHERSWWNTNYIDNLAKNMGHIATAERS*
>PtHsf-B2c
MASPLPVEQNSGETPPSPLAAAAGGETSRSIPTPFLTKTFKIVDDHTIDDVISWNEDGSSFVVWNPTLFSRDLLPKFFKH
NNFSSFVRQLNTYGFRKVVPDRWEFSNECFRKGEKNLLCEIQRRKLVATVAQVVAAPAAVKVIKTSSNSSSDEQVVISTR
SSSPGLSLELLDENERLRKENVRLKGELTEMKSLCGNIFSLVSDFESLREEEEEEVRKVLDLLPMKEEVGDGARIFGVEV
GVKRGRELSGDMEVEEDGMQLRLRQPGGGSSDGVKIEVNGSRNGDR*
>PtHsf-B3b
MANDKGLLEYVRKSTPPPFLLKTYMLVEDPATDEVISWNEEGTGFVVWQPAEFARDLLPTLFKHSNFSSFVRQLNTYGFR
KVATSRWEFCNDMFRKGERELLCQIRRRKAWSSKQQPIAPIQVTTQEFEEDQRSSSTSSSSEYTTLVDENKRLKKENGVL
STELTSMNRKCKELLDLVAKYAHLEKEEEDERPKLFGVRLEAEGDRERKRKRAEISESASILLSQSCI*
>PtHsf-A5a
MEAGSSPSAAAGGGPAPFLIKTYDMVDDSSTDEIVSWSSNKNSFVVWNPPEFARLLLPTFFKHNNFSSFIRQLNTYGFRK
IDPEKWEFANEDFLKDQKHLLKNIHRRKPIHSHSNPQGSLVDQERAAYEEEIDKLSRHKAKLEASILGFSQQRSSAKLHV
EDLTQRIDTMQQRQEKLLSFLEKAVQNPAFVEHLACKIESMDFSAYSKKRRLPQVDHSMPTAENSFVENHCSSRPESNVI
YQDFSNKLRLELSPAVSDINLISRSTQSSNEDGGSPQRKISEGNPKDGPTRTSGLLLAPETLELSDTGTSYTFKVNPAVP
RDLPASGSQAQHSLQANLTSNEEVDGLISCQLNLTLASSALQVNKNPYLARMPPLRQEIVKSPESRFNESNKDSDMRVIQ
NMNLGNEGTTLSSSQEIPNNSQVPASAPARVNDGFWEQFLTERPGSYENEEASSNYRANSYDEQDERRLGFGVPRNAKNM
EQLSL*
>PtHsf-A1d
GFKKVDPNRFEFANEGFLKGKNHLLRSISWKKPIPVHDNLPPQVQNSLAAACVEVGKFGLEKEVERLKWDKNALI*
>PtHsf-C1
MMEANNNNNIVAPFVLKIYQMVSDPTTDSLISWGRANNSFIVIDPLDFSQRILPVYFKHNNFSSFVRQLNTYGFRKVDPD
RWEFANEWFLRGQKQLLKNIVRRKHSSNNKGSSYMQVNIKGEDFDDEDIIMEIARLKQEQKALEQELEGMNKRLEATERR
PQQMMAFIYKVVEDPDLLPRMILEKERTRQIKDKKQRLMISSSATSPSGMAISSTSTIIKSEVVHEEGSIGVISSPETVF
NVDKFCQSSPSPDESDINAIGWLDQVNYGLAVAGPSPFTTGSMGAGIGATVAVLPQGNSTVIGYGGDWGDHINYFGEMAA
GVEDRPRPSYPFSLLGGGF*
