# Supplementary material for: Genome-wide identification, classification, and expression analysis of the HSF gene family in pineapple (Ananas comosus)
Source: PeerJ. 2021 Apr 27;9:e11329. doi: 10.7717/peerj.11329 (PMC8086565; doi:10.7717/peerj.11329)
Supplement: Supplemental Information 5 [file peerj-09-11329-s005.xlsx]

## Sheet: AcHSF promoter sequence
Table S5. The promoter sequences of Ppineapple HSFs.
>Aco016980
CCTTCTAAAGGCTCACAAGCAGAGGTTGATTTTGTTTAAAATCGCTAATGGATTTGATACTTTATAGATAGTTTTGATAAACTTGGTCCATTGTAGGTCAGGCTTCGTAAATTGCTAATCTGCCACCTTTCATTATGAGAGCATTATTTTTTTTAAAAAAAAGTATTTTTTAAAAAAATATATATTTAACTAGCAATATAAAGTAATCAGACCTGAAGTTTGAAATTTTATTTATTTAATCATCAATTTTTTTTTGCCAGTCAGATCAGAACAGTCGGTACGAGGGGAGCATATCAATTTTTTTATCACCCTCACTAGGGATAATCCGTAACACATAACTATTGTATATAATATCGCATTAAATGTACACCAGCGTAAAGTTTGTTTGTAGGTGGGGTG…
>Aco027746
TAGTATAAGATATATTATATATATAATAACATGAGATATATATTATATAACAGTACATATATAATTATACATACATATATATATATATACATACATATATATATATATACAAGATTGTGTAGGCGTCATTGACTTCTTGCAAGAAGTAGGTCCATCTAGAGGTAATGGTGTTGGGTGGATTTATTGTTATGGTGTTGGGTGGATTTATTCTATCAAAAGGTAATTTACAATTCGACAGTTATTGGCACTTTTATCTCAATATTTGATTTAATCATCTCTTTCTCTATTTTTTCGTTCTTTTTCCAATAGAGGAAGTGAAGAAGCGGTGGAAGGTGGAGAAGGAAGAAGAAGAGAAAGAGAAATGCAACTCTTTCTATGTTTTTTTCGTTATTTTTTCGA…
>Aco021879
ATATGCTATCTTTATCATCTGTCATATGTGGCAGTGTGAGAATTATTTATTTTTTGTTACATTTTTTTGGGCAAGTTAAAATTAGTATTTTTTTGTTAGTGAATATTTGCGCCACTTTATATTTTCTTTGGTGAGGAAAAACTTCTCTTTTCCAATATCTTACAGGATTGTTTAAACTTTATTTTTTAAAAAACAATATATATATGTATTATGCTATTTAGTAGTTTGTTTTAATATATGAGGTATTTTTAGGCTCCTCTGTTCTAGAAATGGATTGTTTATCTTTTCTTTGAATTTATTTGAATGTTTTTTTTTGTGGGGCTGTGATGATAGCATAGCTCAGATAAACGCGACATTTGTCGCAGTTGTAAAAAATCGTTGCTATTTTAAGCTCTATAG…
>Aco022474
GGTATCTCAGTTGAGTGGATTTAAGACTGAGGTGCAAGCGAGATGTCCTTCACCTTGAGCCTGCCTTTGCGCGGTATTCCGCGGATGATTGACTCAACACTGAGTCGGGTGGATAGTTTTGTAAAGGTGGATGAAACCTTATGAGCGGAATTGTAATTGACATGAATGTAAGATAGAAGTAACCTTAGAAGTCAATTGGATGAGATGTGGATAGTAAGTAGAATTAGTAGATCTACTTACGTTATTGCATATTGAGTTGCATGATTGCATTGTTGCATATTGTGAGACATAACATGTATTTTAATACTTGCATATATATATCTGTTGGATATCTGTTGGATTAATATGTTGCAAACTTGCAATGCCTCCTTCAGACCAGGGGGGTCAAGCTCTTCTCTT…
>Aco020850
GGGTATTTTAGACAGTTCGCTGCAAATTCGGACCGAATTTGCAAAATCTAAAAATGCGGTTCAGTTTTACAAAAGGTCAAAACTTGTGAATTTTTTGTGCAAATTGGCCAAAACAAAATAAGATTCAAGAGTTTATTTATTAAGAAAAATGCAATGGTAAAGGGTCTGCATACATTTTCTAAAATTACTCTTTTTAGGTAAACCGTTGCTTATGGCGCGTCCGGCTTATTTTGCTAACGAACAGTTCGCGTCCGGAATGGGAAGCATACGATGGGGGTGTTTGGCCTAGCTTTTAAAAAGCGCTTTTGGACTGAAAAGTGATTTTCGGCTCAATAGAGCGTTTGGCAACTCACTTTTAAAATCTGATTCTGCTTTTTAGAATCAGAAAACTGATTTTGA…
>Aco005862
TTAATCATTCTATGTTTTATTATCTTATTAAAACGGACTTTTTTATAAAATAATCTTTTAAAATTTTATTATTTGCGAAATAACTTTACTAAAATTATATTTGAAAAACTAATCTTTTAAAGACGGTGAATGGTTCACCGTCTTCATAAAGACGATGCACGATTCACCGCTTACCTAATTTTTCACAAAAAAGGTGAATCATTCACCGCCTTTCACTTGTCTACTGTTTTTTTCTATAATCCTATCAATCATATAAATATTTCAACAAATCATATGTAATCTTAACAAACTGAAAATTTTAATAATCTATCCATATAATTCTAACAAATAAAAAGATTCTAATAATTTATCCATACAATCGTAATAATTATATATAATCTTAATAATTTGAGATTCTTA…
>Aco015210
GAAACAAAAATTATTATATGAAAGATCATAGTAGTTGTAAATATGAATGGTCATATTTAAATTGGTAGGATTGACCTTTATTAAGTGGATATAAATACAAAGAAAGAAGATTATGAACAAAAAATTTTAAAATTAAAAATTAACGATAAACAGTACGATTAATTCTGAAAATTTAAAAATGTGAGTGACTTTAAAAAAACAAAAAAAAAAAAAACTGCGCACCTAAAATGAGAAAATGAGATAAAAGTTTAGGACCAAAGGCACAATTTAGAAAATCCGGTAGACCAAAATGAAAAATCAAATAGATATTTGGCATCAATCAATCATCAATGGTGCAATTAATGCTTTGCTTTTTTAAAGTTGTTTCCTCAAATGAAATGAAGCTTTTAAAGCAGCGCA…
>Aco008819
CTGGCAGATACATTTTAAATTACGGGATAAAAAAAGTATGAAACTGACTCCATTCCCAGATTCACGCCGCGTCAGCGGATAGGCACCCACGTGGCGTGCATCGGAGCCCGGGGCTCCAAGAAATTTTTAATTATTTTAATTATTATTATTTTGATTTATCCTCTCATCCAAACGAATAAGTGCAAAAATCTATGCGGTCCGTAAATAATAAAATAATAATAAAATAATAAAATATGCGGGCGCCCCATTTTTGCCCCTCTTCTAGAACCTTCCCACCTCCACTACTTCTCTCGAACCTTCCGTTTGCGAAGCTTCTCCCTTTTTCCCCCCTCTCCCCTATTTAAATCCTCTCTCTCTCTCCACCTCTCTCTCTCTCCTCTCTCTCTCTAAGAAAAGAAG…
>Aco009685
ATTGCTGAAACTATTGTTGAAACTAGGGAAAAAGGATTGCTTGGATCTCCTCTCCGTAAAGGATTAGCAGGTCATATAAATGTGCACAAGGATTATGAGAAAAATGCAAACAACAAATATTGGGAGCAACAACACATCCAAAGTTTTCTTGAGAGAGGGAGAGCTCGGCTATAACTAAGCACACTAGAAACAAACAGATGTTCACATAAAACAATAGTTTCGGGATAAATTTTATACATTGAGCATGAAAAGGCATCTCTTTACCGTTAATACGAGCTGGTGGGGATTAATTTAGTAGTATAGAGTGATACGCTATAAATTTGAGAAGCACAAACAGTTGCATCGAGAATTAGGGGTTAAAGGAAAGGATTGGCGAGAGAGAGAGAGAGAGAGAGAGAG…
>Aco016689
GCGGGAATAATTCTTTATAAAAATAATATTATTCTCTATTATTTGTTTTTTTTTGTATAACCGTACTCATGTGGATGTGGGCTCTGACTTAGGATGGGCCGGATGTTGCATAATTGTGGATCGGATTGGGCCGCCACGTTATGTCGGGCAGGCTCTAAGGCGGCCTATTTGCATCTTCACGGGCCATGGCCATGGACGATGGTGGAGGTAGGAGGTTGGAAATTGGATCCGCTTTGGCTTCCGGCTCACATCGGCAATCCACCTCTTTTCCCGATCCCAATCTCGTCGATGTGAGCTGGAGATGGGGTTTCATCCCCCTCCCATTTTTGCGGGGGGGAAGGGTTTTATTTATGTCCTCCGGTTCTTTCTTTCATTTTTTCTTTCAAAACCTTGATCAGG…
>Aco005592
TTAAATCGCTAGTTATGCAGCAATGATCATGCTTTTACTCGTTATCAGCGTGGAGAAATGACTACTATACTATTTCTACGACTGCTACCACTAGTACTTTTTACAACCACTAGCACCGATATCTTAGTAGTTTGTTTACAAACGAGGAGTAGATCAGAAAACTTTTCTTATAGCAATCACATAATTAAAAGGTTAAATTACAGAAAATTTTTCTATAATAATCAGTTTTTTCACTTTTTCCAATTGACATTTAAAATCCTACACTTTGCCCAAAAAATATTCACAGGAGGATTACAGTGTGTAAAATGATCATTTTGCTCCTCGCCATTGTCGTCTTCTTCTCCATCTTCCTTAGCCGCCTCTTCGTTCGGCCGCGATTCCCACCTCAATCCGTCGCGA…
>Aco016114
TCGGTAGCTTTTTCGTTAATATTTCATTAAACTATATACAAAAAACTTTAGATACCCATCTAGATTTATCAAATATTCACTATAGTACCCTTTAATTTTAACTTTATCACTGATTTAAGAAAAACAAATAATGAAATTATAAGAAAAAGAGAAAAAAAAAATCACAGGAGGACAAATTGATACATTTTAAACCACAGGGGGGCAAAGTGAAAACTACGAAACCACAGGGAAGGTTTTTGAAGTTTTTTCAAATATTAACAATAAACATTATTTTCATAATATCAATAATATTCTATCTCCACCTTATCACTTAAGTACTTTGTAGTTTCAACTTTGTAGTTTCAATTCTTATTTTTCATTATACTATCGGTTAACTTTTTTCTTTAAAACAGTCACGTG…
>Aco001320
ATGAATTGAATTTGCACCGAAGACTCCCACCTAATAATTAGGAAACTAAAACGCGCCACAACATCACTGCTTTGACTCCATCCACAACACTCTCTCCCCCAACTCTTTCTCTTCTTTTATTGAATTTGCACCCAAGGAGTTGGGTGTGTATCGCGGACCCAAACAAGAAAATGGATGCGTTGCGTTCCCACTAATAAGCCAAATTAACTCCCACATTTCCCAACCTTAATTTGCTCCACCACTGTCTAAAACAATTGATTAATATTTCAAATATGTCACTAATCTAGAGAAACGTTCTCGGATAAGACACTACAATAAAAACGGTCTATAGCGACACTTTTAAACGTAGGTATATGTCAAAAAAATGCTGCTAGCTAAAATTACTGACACTTTTAAAAA…
>Aco002688
TATTATTAGTAGCAAAATCTCATTATTGCTATCAGTTTTTTAGCCTTTAGATTAACTCTTTTCATTATTTCTAACTATTGGATTAAATACTGTAATCGAGTGAGGACCACGCAACCCTAGGAAGACATTCAACTCTATCACCAATAAAATAGTTGCGAGGGTCTGGAAACATTTTTGCCAGAGATTAATGATGTTGTAACAGTTGGCGCGAAAGTGGGCATAAGTAACTAACCTAATTCGGTAATGGGTATGTTGCAAGTCAAATATATCGGTGGGAATGATAAAAAACCCCTTTACTTTCCAAAATTTGCCAGATAAGCCCCTCTCTGCCTTCAATTAGCTCAGGAGGAAATCGTGTCCGATTGTTTCACCAAAAATTTCATTCAAATTAAATTAGAT…
>Aco030273
ATGAATTGAATTTGCACCGAAGACTCCCACCTAATAATTAGGAAACTAAAACGCGCCACAACATCACTGCTTTGACTCCATCCACAACACTCTCTCCCCCAACTCTTTCTCTTCTTTTATTGAATTTGCACCCAAGGAGTTGGGTGTGTATCGCGGACCCAAACAAGAAAATGGATGCGTTGCGTTCCCACTAATAAGCCAAATTAACTCCCACATTTCCCAACCTTAATTTGCTCCACCACTGTCTAAAACAATTGATTAATATTTCAAATATGTCACTAATCTAGAGAAACGTTCTCGGATAAGACACTACAATAAAAACGGTCTATAGCGACACTTTTAAACGTAGGTATATGTCAAAAAAATGCTGCTAGCTAAAATTACTGACACTTTTAAAAA…
>Aco027680
AGCACAAGGGCTGCTGTGCTCCTAATAGCACAGTAGCCCTACTATATATATATATATATATATAAAATGTATTTTAATTATATATATATAATGTATTTTAATTATATATAGGCTTTAATTTAATTTGGACCATTATTGTTGGCCCATAAAATAAATCCAATAAGTACAACAGTGCAATTGAACCCAACTCTAAATTTACATAACACACTCTCTCTTTCAGACTTTCACTTTTGTACATAACTCTAAAACATGATAATATTCAAATTTTCAAATTTCTATTTTTTTTCTCCTCTCTCTTTCTCTCTTTCTCTTTGACCCTCACCTGGTCAGGCAGTCACCCTAGCTCATATTTCTTTCAATTATTTTGTATTTTGAACTATTGGATATGTTGCATCAAAT…
>Aco013873
ATGCTAGGTGTCCACTTGTTACACCCTATTCTTCCATAGGGGCTGTCAACGAGCCGAACACGAGTGAGCCGGAGTCACCTCAAGCCAGGTCTAAACTGTTAAAGGTTGGCTCGTGTTCGGCTCGAGCTCGTGATGAGCTCGAAAAGTCTAGCTTGTGTTCGGCTGGCAATGTATTCGAGCTGGTTCATATTCAATTCGTTTGTTCAGTTGACGGCCTTGACATTTAGAACATAGGTTCTTGGAACAAGAGGAATAGGAGGAAAGAGAGAGATCTTATTGAGTACATCATAGCGCCAAATGGCGGGGTTTTCGAATTTTGAACGGCCAATCCAAAATTTAAGTAAATGGTTTTAAACTAAAAATATTAAAATTTTAATTCACCTCTAATTCCAAATTTAA…
>Aco017163
TTTGGTCCTACAATCTGTGCATTTTGTGGCCAAAAAAATATAGCATCAAGAACAAAAACAACCAAACCTTAGTTACAGCTATTTAGGTTGCCTAGCTTGTTGGGCCCTTTTTTTTTTTTTTTCTTTTATTAATCAGCTGGCATCAGTAAATGTCACAAACATCATTTCTTGAGACCTTTTTTCCGAACAGCACTTTTAGGCCTCCTTTGACATTTTTGTCATTTTTCCATTTTTTAAATACTAATTCTATATAGTTTATTTTATGGGTGAAAAGATTTTTCTCTTGCTGTCATTGTTAGTAGGCTTGTAGCACACTCAGACTCAGTGATGAATTTTGGAAGCAAAAGAAATTTGTTACCAAATTTTTATTTTTTGTACCCAGCCAAATACCTTGGATAT…
>Aco031324
NNNNNNNNNNNNNNNNNNNNNNNNNNNNNNNNNNNNNNNNNNNNNNNNNNNNNNNNNNNNNNNNNNNNNNNNNNNNNNNNNNNNNNNNNNNNNNNNNNNNNNNNNNNNNNNNNNNNNNNNNNNNNNNNNNNNNNNNNNNNNNNNNNNNNNNNNNNNNNNNNNNNNNNNNNNNNNNNNNNNNNNNNNNNNNNNNNNNNNNNNNNNNNNNNNNNNNNNNNNNNNNNNNNNNNNNNNNNNNNNNNNNNNNNNNNNNNNNNNNNNNNNNNNNNNNNNNNNNNNNNNNNNNNNNNNNNNNNNNNNNNNNNNNNNNNNNNNNNNNNNNNNNNNNNNNNNNNNNNNNNNNNNNNNNNNNNNNNNNNNNNNNNNNNNNNNNNNNNNNNNNNNNNNNNNNNNNNNNNN…
>Aco005573
CCACTTGATCCTTCGTATTCAATGTCATTGACAAATTCACTAATCACACTAGTTTTGTTTTCTCTAATTCTCCCTTCTGAATCTTCTTCTCAAAAATGGCGTCCAATCATAAAATACCAGGTTTAGGCCTTCCTTATCGACAGCAATTGAAAAAAGGCAGCATAAAACGTAAGCCATAGACATGTATTGTCACGGAAAAATGATAAATAACAAAGATATCAGAAAAAGATAATCCGATATATAATAGCAATAACAACAACAATAATAATAATTATATAATATGATCTCATATATTAATTTTCTAAGTAAATAGACGGATAAGAATTATGATATTATGATACGAAAAGGGAGAAGATATATACCCATCAACCCCAAAGACTAAAATCCTAGTATTAGGCC…
>Aco006046
GTTGGATTATGAAAATTTGCTGCTTATGCAGAATCTAGTTTGGTAATATTATGGTAAACAATATTTATTTTATAGAAAGGTTCAAAAATTTTAAATTGCTCCTAATTTTCTTTTATACTATAAAAATTACAGCGATAATCACCACCGAAAAAATATGTGCTTGACGGTTGTCGAAAATACTTTAATATTTTTGGACTTTCTAAAATACAAAATAAGTACTTTTGGTTATCATATTATCAAACTAGGCCTTAATCTAAATTGTATTTGTAATTTTAACTTTTATCAATGAGATATTATTTTTTAGAATTGAAAGTAAAGATAAAATAAGTTAAATTAGGTCGGCACCTCCTTTTGTAGAAAACTCTAGGCAATAATAATAATTAATTAAAGAGTGGTGAA…
>Aco027352
AAAGAACTGAAAAGTATAGCAATACGTATACATATTTTTATTCTAACTTTCATTTTATTCAATATATCACATAGATGTCAGTTCTAGCCTAGGTAGAGATGGCGCGTATATAGTCTATAGAACGGAGAAGCGTAGCAATACATGTTTCTGATCAAATATCATTTTATCCACCAAGGGTGAAAAATTAATCTCAACGCTAAACAAATCCTTAGCCGAAATGGCACGTGCGGGGCACGCGCGTACAACACGCTAACGAAAAGACCTCACTGCATTTTTGAATCAGTAAATGTCGCCCAGCCACGTTAACCCAAAACACGACAAACACGTACGGGAAAGTCTTTTTCTGTTACAATTATTTCACATAAAATTACTTTTACATTACGCATAAATATAATAAAT…
