# Supplementary material for: Genome-wide identification, classification, and expression analysis of the HSF gene family in pineapple (Ananas comosus)
Source: PeerJ. 2021 Apr 27;9:e11329. doi: 10.7717/peerj.11329 (PMC8086565; doi:10.7717/peerj.11329)
Supplement: Supplemental Information 6 [file peerj-09-11329-s006.xlsx]

## Sheet: Cis-elememts analysis 
Table S6. The cis-elememts analysis in Pineapple HSFs promoter sequences.
Aco001320	ATC-motif	AGTAATCT	686	8	+	Spinacia oleracea	part of a conserved DNA module involved in light responsiveness
Aco001320	MYB	CAACCA	702	6	-	Arabidopsis thaliana
Aco001320	MYB	CAACAG	811	6	-	Arabidopsis thaliana
Aco001320	dOCT	CACGGATC	850	8	+	Zea mays
Aco001320	Myb-binding site	CAACAG	811	6	-	Nicotiana tabacum
Aco001320	LTR	CCGAAA	510	6	+	Hordeum vulgare	cis-acting element involved in low-temperature responsiveness
Aco001320	G-box	ACACGTGT	1487	8	-	Brassica napus	cis-acting regulatory element involved in light responsiveness
Aco001320	G-box	CACGTG	1488	6	-	Arabidopsis thaliana	cis-acting regulatory element involved in light responsiveness
Aco001320	MYC	CAATTG	252	6	+	Arabidopsis thaliana
Aco001320	MYC	CATTTG	656	6	-	Arabidopsis thaliana
Aco001320	MYC	CATGTG	789	6	+	Arabidopsis thaliana
Aco001320	MYC	CAATTG	1063	6	-	Arabidopsis thaliana
Aco001320	CCGTCC-box	CCGTCC	661	6	-	Petroselinum hortense
Aco001320	CCGTCC-box	CCGTCC	1852	6	-	Petroselinum hortense
Aco001320	chs-CMA1a	TTACTTAA	1248	8	+	Daucus carota	part of a light responsive element
Aco001320	O2-site	GATGATGTGG	56	9	-	Zea mays	cis-acting regulatory element involved in zein metabolism regulation
Aco001320	AT~TATA-box	TATATA	426	6	+	Arabidopsis thaliana
Aco001320	AT~TATA-box	TATATA	1665	6	-	Arabidopsis thaliana
Aco001320	TATA-box	TATA	327	4	+	Arabidopsis thaliana	core promoter element around -30 of transcription start
Aco001320	TATA-box	TATA	351	4	+	Arabidopsis thaliana	core promoter element around -30 of transcription start
Aco001320	TATA-box	TATA	407	4	+	Arabidopsis thaliana	core promoter element around -30 of transcription start
Aco001320	TATA-box	TATATA	426	6	+	Arabidopsis thaliana	core promoter element around -30 of transcription start
Aco001320	TATA-box	TATA	428	4	+	Arabidopsis thaliana	core promoter element around -30 of transcription start
Aco001320	TATA-box	TATA	453	4	+	Arabidopsis thaliana	core promoter element around -30 of transcription start
Aco001320	TATA-box	TATA	799	4	+	Arabidopsis thaliana	core promoter element around -30 of transcription start
Aco001320	TATA-box	TATAAA	973	6	-	Helianthus annuus	core promoter element around -30 of transcription start
Aco001320	TATA-box	TATAA	974	5	-	Arabidopsis thaliana	core promoter element around -30 of transcription start
Aco001320	TATA-box	TATA	975	4	+	Arabidopsis thaliana	core promoter element around -30 of transcription start
Aco001320	TATA-box	TATA	1055	4	-	Arabidopsis thaliana	core promoter element around -30 of transcription start
Aco001320	TATA-box	ATATAA	1128	6	+	Brassica oleracea	core promoter element around -30 of transcription start
Aco001320	TATA-box	TATA	1129	4	-	Arabidopsis thaliana	core promoter element around -30 of transcription start
Aco001320	TATA-box	TACAAAA	1214	7	+	Oryza sativa	core promoter element around -30 of transcription start
Aco001320	TATA-box	ccTATAAAaa	1336	9	+	Arabidopsis thaliana	core promoter element around -30 of transcription start
Aco001320	TATA-box	TATA	1338	4	-	Arabidopsis thaliana	core promoter element around -30 of transcription start
Aco001320	TATA-box	ATTATA	1465	6	+	Brassica napus	core promoter element around -30 of transcription start
Aco001320	TATA-box	TATAA	1466	5	-	Arabidopsis thaliana	core promoter element around -30 of transcription start
Aco001320	TATA-box	TATA	1467	4	-	Arabidopsis thaliana	core promoter element around -30 of transcription start
Aco001320	TATA-box	TATATAA	1664	7	-	Arabidopsis thaliana	core promoter element around -30 of transcription start
Aco001320	TATA-box	TATATA	1665	6	-	Arabidopsis thaliana	core promoter element around -30 of transcription start
Aco001320	TATA-box	ATATAT	1666	6	-	Brassica napus	core promoter element around -30 of transcription start
Aco001320	TATA-box	TATA	1667	4	-	Arabidopsis thaliana	core promoter element around -30 of transcription start
Aco001320	TATA-box	TATA	1932	4	-	Arabidopsis thaliana	core promoter element around -30 of transcription start
Aco001320	Unnamed__4	CTCC	24	4	+	Petroselinum hortense
Aco001320	Unnamed__4	CTCC	76	4	+	Petroselinum hortense
Aco001320	Unnamed__4	CTCC	94	4	+	Petroselinum hortense
Aco001320	Unnamed__4	CTCC	136	4	-	Petroselinum hortense
Aco001320	Unnamed__4	CTCC	208	4	+	Petroselinum hortense
Aco001320	Unnamed__4	CTCC	234	4	+	Petroselinum hortense
Aco001320	Unnamed__4	CTCC	540	4	-	Petroselinum hortense
Aco001320	Unnamed__4	CTCC	543	4	-	Petroselinum hortense
Aco001320	Unnamed__4	CTCC	888	4	+	Petroselinum hortense
Aco001320	Unnamed__4	CTCC	954	4	-	Petroselinum hortense
Aco001320	Unnamed__4	CTCC	1293	4	-	Petroselinum hortense
Aco001320	Unnamed__4	CTCC	1430	4	+	Petroselinum hortense
Aco001320	Unnamed__4	CTCC	1771	4	-	Petroselinum hortense
Aco001320	Unnamed__4	CTCC	1774	4	-	Petroselinum hortense
Aco001320	Unnamed__4	CTCC	1808	4	-	Petroselinum hortense
Aco001320	Unnamed__4	CTCC	1825	4	-	Petroselinum hortense
Aco001320	Unnamed__4	CTCC	1828	4	-	Petroselinum hortense
Aco001320	Unnamed__4	CTCC	1886	4	-	Petroselinum hortense
Aco001320	Unnamed__4	CTCC	1902	4	+	Petroselinum hortense
Aco001320	TGA-element	AACGAC	547	6	+	Brassica oleracea	auxin-responsive element
Aco001320	GARE-motif	TCTGTTG	810	7	+	Brassica oleracea	gibberellin-responsive element
Aco001320	CGTCA-motif	CGTCA	1894	5	-	Hordeum vulgare	cis-acting regulatory element involved in the MeJA-responsiveness
Aco001320	G-Box	CACGTG	1488	6	-	Pisum sativum	cis-acting regulatory element involved in light responsiveness
Aco001320	ABRE	CACGTG	1488	6	-	Arabidopsis thaliana	cis-acting element involved in the abscisic acid responsiveness
Aco001320	ABRE	ACGTG	1489	5	+	Arabidopsis thaliana	cis-acting element involved in the abscisic acid responsiveness
Aco001320	Myb	TAACTG	436	6	-	Arabidopsis thaliana
Aco001320	CCGTCC motif	CCGTCC	661	6	-	Nicotiana tabacum
Aco001320	CCGTCC motif	CCGTCC	1852	6	-	Nicotiana tabacum
Aco001320	Box 4	ATTAAT	258	6	+	Petroselinum crispum	part of a conserved DNA module involved in light responsiveness
Aco001320	Box 4	ATTAAT	1166	6	-	Petroselinum crispum	part of a conserved DNA module involved in light responsiveness
Aco001320	Box 4	ATTAAT	1184	6	-	Petroselinum crispum	part of a conserved DNA module involved in light responsiveness
Aco001320	MRE	AACCTAA	456	7	+	Petroselinum crispum	MYB binding site involved in light responsiveness
Aco001320	MRE	AACCTAA	802	7	+	Petroselinum crispum	MYB binding site involved in light responsiveness
Aco001320	MRE	AACCTAA	1578	7	+	Petroselinum crispum	MYB binding site involved in light responsiveness
Aco001320	as-1	TGACG	1894	5	+	Arabidopsis thaliana
Aco001320	AE-box	AGAAACTT	1434	8	-	Arabidopsis thaliana	part of a module for light response
Aco001320	TGACG-motif	TGACG	1894	5	+	Hordeum vulgare	cis-acting regulatory element involved in the MeJA-responsiveness
Aco001320	DRE core	GCCGAC	1755	6	-	Arabidopsis thaliana
Aco001320	LAMP-element	CTTTATCA	1105	8	+	Pisum sativum	part of a light responsive element
Aco001320	WUN-motif	AAATTACT	378	8	+	Nicotiana glutinosa
Aco001320	WUN-motif	AAATTTCTT	1363	9	+	Nicotiana glutinosa
Aco001320	STRE	AGGGG	1632	5	-	Arabidopsis thaliana
Aco001320	CAAT-box	CAAT	5	4	-	Nicotiana glutinosa
Aco001320	CAAT-box	CAAAT	10	5	-	Pisum sativum	common cis-acting element in promoter and enhancer regions
Aco001320	CAAT-box	CAAT	119	4	-	Nicotiana glutinosa
Aco001320	CAAT-box	CAAAT	124	5	-	Pisum sativum	common cis-acting element in promoter and enhancer regions
Aco001320	CAAT-box	CAACCAACTCC	136	10	-	Arabidopsis thaliana	common cis-acting element in promoter and enhancer regions
Aco001320	CAAT-box	CAAAT	200	5	+	Pisum sativum	common cis-acting element in promoter and enhancer regions
Aco001320	CAAT-box	CAAAT	229	5	-	Pisum sativum	common cis-acting element in promoter and enhancer regions
Aco001320	CAAT-box	CAAT	252	4	+	Nicotiana glutinosa
Aco001320	CAAT-box	CAAT	254	4	-	Nicotiana glutinosa
Aco001320	CAAT-box	CAAAT	268	5	+	Pisum sativum	common cis-acting element in promoter and enhancer regions
Aco001320	CAAT-box	CAAT	313	4	+	Nicotiana glutinosa
Aco001320	CAAT-box	CAAT	584	4	-	Nicotiana glutinosa
Aco001320	CAAT-box	CAAT	613	4	-	Nicotiana glutinosa
Aco001320	CAAT-box	CAAAT	642	5	-	Pisum sativum	common cis-acting element in promoter and enhancer regions
Aco001320	CAAT-box	CAAAT	656	5	+	Pisum sativum	common cis-acting element in promoter and enhancer regions
Aco001320	CAAT-box	CCAAT	709	5	-	Arabidopsis thaliana	common cis-acting element in promoter and enhancer regions
Aco001320	CAAT-box	CAAT	914	4	+	Nicotiana glutinosa
Aco001320	CAAT-box	CAAT	921	4	-	Nicotiana glutinosa
Aco001320	CAAT-box	CAAAT	927	5	+	Pisum sativum	common cis-acting element in promoter and enhancer regions
Aco001320	CAAT-box	CAAAT	940	5	+	Pisum sativum	common cis-acting element in promoter and enhancer regions
Aco001320	CAAT-box	CAAT	1028	4	-	Nicotiana glutinosa
Aco001320	CAAT-box	CCAAT	1062	5	+	Arabidopsis thaliana	common cis-acting element in promoter and enhancer regions
Aco001320	CAAT-box	CAAT	1063	4	+	Nicotiana glutinosa
Aco001320	CAAT-box	CAAT	1065	4	-	Nicotiana glutinosa
Aco001320	CAAT-box	CAAT	1085	4	+	Nicotiana glutinosa
Aco001320	CAAT-box	CCAAT	1092	5	-	Arabidopsis thaliana	common cis-acting element in promoter and enhancer regions
Aco001320	CAAT-box	CAAAT	1175	5	+	Pisum sativum	common cis-acting element in promoter and enhancer regions
Aco001320	CAAT-box	CAAT	1188	4	-	Nicotiana glutinosa
Aco001320	CAAT-box	CAAT	1208	4	+	Nicotiana glutinosa
Aco001320	CAAT-box	CAAT	1271	4	+	Nicotiana glutinosa
Aco001320	CAAT-box	CAAAT	1532	5	-	Pisum sativum	common cis-acting element in promoter and enhancer regions
Aco001320	CAAT-box	CCAAT	1553	5	+	Arabidopsis thaliana	common cis-acting element in promoter and enhancer regions
Aco001320	CAAT-box	CAAT	1554	4	+	Nicotiana glutinosa
Aco001320	CAAT-box	CAAT	1626	4	+	Nicotiana glutinosa
Aco001320	CAAT-box	CAAT	1651	4	+	Nicotiana glutinosa
Aco001320	CAAT-box	CAAT	1709	4	+	Nicotiana glutinosa
Aco001320	CAAT-box	CAAAT	1723	5	-	Pisum sativum	common cis-acting element in promoter and enhancer regions
Aco001320	CAAT-box	CAAT	1733	4	-	Nicotiana glutinosa
Aco001320	CAAT-box	CAAT	1781	4	-	Nicotiana glutinosa
Aco001320	CAAT-box	CAAT	1991	4	+	Nicotiana glutinosa
Aco001320	A-box	CCGTCC	661	6	-	Petroselinum crispum	cis-acting regulatory element
Aco001320	A-box	CCGTCC	1852	6	-	Petroselinum crispum	cis-acting regulatory element
Aco001320	AT1-motif	AATTATTTTTTATT	1400	13	+	Solanum tuberosum	part of a light responsive module
Aco001320		motif_sequence	92	4	+	organism	short_function
Aco001320		motif_sequence	109	4	+	organism	short_function
Aco001320		motif_sequence	591	4	-	organism	short_function
Aco001320		motif_sequence	682	4	-	organism	short_function
Aco001320		motif_sequence	733	4	-	organism	short_function
Aco001320		motif_sequence	1256	4	+	organism	short_function
Aco001320		motif_sequence	1288	4	-	organism	short_function
Aco001320		motif_sequence	1571	4	-	organism	short_function
Aco001320		motif_sequence	1808	4	-	organism	short_function
Aco001320		motif_sequence	1900	4	+	organism	short_function
Aco001320		motif_sequence	1908	4	+	organism	short_function
Aco001320	W box	TTGACC	1548	6	+	Arabidopsis thaliana
Aco001320	TCT-motif	TCTTAC	1080	6	+	Arabidopsis thaliana	part of a light responsive element
Aco001320	WRE3	CCACCT	27	6	+	Pisum sativum
Aco002688	ARE	AAACCA	1827	6	-	Zea mays	cis-acting regulatory element essential for the anaerobic induction
Aco002688	CGTCA-motif	CGTCA	1438	5	-	Hordeum vulgare	cis-acting regulatory element involved in the MeJA-responsiveness
Aco002688	G-Box	CACGTG	1498	6	-	Pisum sativum	cis-acting regulatory element involved in light responsiveness
Aco002688	CTAG-motif	ACTAGCAGAA	1736	9	-	Avena sativa
Aco002688	CCAAT-box	CAACGG	1512	6	+	Hordeum vulgare	MYBHv1 binding site
Aco002688	TATA-box	ATATAT	264	6	+	Brassica napus	core promoter element around -30 of transcription start
Aco002688	TATA-box	TATA	265	4	+	Arabidopsis thaliana	core promoter element around -30 of transcription start
Aco002688	TATA-box	taTATAAAtc	402	9	+	Arabidopsis thaliana	core promoter element around -30 of transcription start
Aco002688	TATA-box	TATAAA	450	6	-	Helianthus annuus	core promoter element around -30 of transcription start
Aco002688	TATA-box	TATAA	451	5	-	Arabidopsis thaliana	core promoter element around -30 of transcription start
Aco002688	TATA-box	TATA	452	4	+	Arabidopsis thaliana	core promoter element around -30 of transcription start
Aco002688	TATA-box	TATA	890	4	+	Arabidopsis thaliana	core promoter element around -30 of transcription start
Aco002688	TATA-box	ATATAT	900	6	+	Brassica napus	core promoter element around -30 of transcription start
Aco002688	TATA-box	TATATA	901	6	+	Arabidopsis thaliana	core promoter element around -30 of transcription start
Aco002688	TATA-box	TATA	903	4	+	Arabidopsis thaliana	core promoter element around -30 of transcription start
Aco002688	TATA-box	TATAA	961	5	-	Arabidopsis thaliana	core promoter element around -30 of transcription start
Aco002688	TATA-box	TATA	962	4	+	Arabidopsis thaliana	core promoter element around -30 of transcription start
Aco002688	TATA-box	TACAAAA	981	7	+	Oryza sativa	core promoter element around -30 of transcription start
Aco002688	TATA-box	TATA	1010	4	-	Arabidopsis thaliana	core promoter element around -30 of transcription start
Aco002688	TATA-box	TATA	1025	4	-	Arabidopsis thaliana	core promoter element around -30 of transcription start
Aco002688	TATA-box	TATA	1052	4	-	Arabidopsis thaliana	core promoter element around -30 of transcription start
Aco002688	TATA-box	TATACA	1070	6	-	Helianthus annuus	core promoter element around -30 of transcription start
Aco002688	TATA-box	TATA	1072	4	-	Arabidopsis thaliana	core promoter element around -30 of transcription start
Aco002688	TATA-box	TATACA	1276	6	-	Helianthus annuus	core promoter element around -30 of transcription start
Aco002688	TATA-box	TATA	1278	4	-	Arabidopsis thaliana	core promoter element around -30 of transcription start
Aco002688	TATA-box	TATAAGAA	1546	8	-	Zea mays	core promoter element around -30 of transcription start
Aco002688	TATA-box	TATAA	1549	5	-	Arabidopsis thaliana	core promoter element around -30 of transcription start
Aco002688	TATA-box	TATA	1550	4	-	Arabidopsis thaliana	core promoter element around -30 of transcription start
Aco002688	TATA-box	TACAAAA	1989	7	+	Oryza sativa	core promoter element around -30 of transcription start
Aco002688	AT~TATA-box	TATATA	901	6	+	Arabidopsis thaliana
Aco002688	Unnamed__4	CTCC	345	4	-	Petroselinum hortense
Aco002688	Unnamed__4	CTCC	499	4	-	Petroselinum hortense
Aco002688	Unnamed__4	CTCC	1017	4	+	Petroselinum hortense
Aco002688	Unnamed__4	CTCC	1184	4	+	Petroselinum hortense
Aco002688	Unnamed__4	CTCC	1396	4	+	Petroselinum hortense
Aco002688	Unnamed__4	CTCC	1594	4	+	Petroselinum hortense
Aco002688	Unnamed__4	CTCC	1640	4	+	Petroselinum hortense
Aco002688	Unnamed__4	CTCC	1643	4	+	Petroselinum hortense
Aco002688	Unnamed__4	CTCC	1646	4	+	Petroselinum hortense
Aco002688	Unnamed__4	CTCC	1652	4	+	Petroselinum hortense
Aco002688	Unnamed__4	CTCC	1718	4	+	Petroselinum hortense
Aco002688	Unnamed__4	CTCC	1765	4	-	Petroselinum hortense
Aco002688	Unnamed__4	CTCC	1791	4	-	Petroselinum hortense
Aco002688	Unnamed__4	CTCC	1795	4	-	Petroselinum hortense
Aco002688	Unnamed__4	CTCC	1867	4	+	Petroselinum hortense
Aco002688	Unnamed__4	CTCC	1997	4	-	Petroselinum hortense
Aco002688	AAGAA-motif	GAAAGAA	434	7	-	Avena sativa
Aco002688	AAGAA-motif	GAAAGAA	695	7	-	Avena sativa
Aco002688	O2-site	GATGA(C/T)(A/G)TG(A/G)	1338	8	-	Zea mays	cis-acting regulatory element involved in zein metabolism regulation
Aco002688	box S	AGCCACC	592	7	-	Arabidopsis thaliana
Aco002688	GC-motif	CCCCCG	1446	6	+	Zea mays	enhancer-like element involved in anoxic specific inducibility
Aco002688	GC-motif	CCCCCG	1467	6	-	Zea mays	enhancer-like element involved in anoxic specific inducibility
Aco002688	GC-motif	CCCCCG	1574	6	+	Zea mays	enhancer-like element involved in anoxic specific inducibility
Aco002688	MYC	CATTTG	543	6	+	Arabidopsis thaliana
Aco002688	MYC	CATTTG	1559	6	-	Arabidopsis thaliana
Aco002688	ABRE4	CACGTA	1263	6	-	Zea mays
Aco002688	LTR	CCGAAA	1186	6	+	Hordeum vulgare	cis-acting element involved in low-temperature responsiveness
Aco002688	ABRE3a	TACGTG	1263	6	+	Zea mays
Aco002688	G-box	TACGTG	1263	6	+	Arabidopsis thaliana	cis-acting regulatory element involved in light responsiveness
Aco002688	G-box	ACACGTGT	1497	8	-	Brassica napus	cis-acting regulatory element involved in light responsiveness
Aco002688	G-box	CACGTG	1498	6	-	Arabidopsis thaliana	cis-acting regulatory element involved in light responsiveness
Aco002688	G-box	CACGAC	1816	6	-	Zea mays	cis-acting regulatory element involved in light responsiveness
Aco002688	MYB	CAACCA	832	6	-	Arabidopsis thaliana
Aco002688	MYB	TAACCA	1227	6	+	Arabidopsis thaliana
Aco002688	MYB	CAACCA	1452	6	+	Arabidopsis thaliana
Aco002688	GT1-motif	GGTTAA	1226	6	-	Arabidopsis thaliana	light responsive element
Aco002688	MYB recognition site	CCGTTG	1512	6	-	Arabidopsis thaliana
Aco002688	ERE	ATTTTAAA	1202	8	+	Nicotiana glutinos
Aco002688	MYB-like sequence	TAACCA	1227	6	+	Arabidopsis thaliana
Aco002688	TC-rich repeats	ATTCTCTAAC	1912	9	-	Nicotiana tabacum	cis-acting element involved in defense and stress responsiveness
Aco002688		motif_sequence	325	4	+	organism	short_function
Aco002688		motif_sequence	790	4	+	organism	short_function
Aco002688		motif_sequence	878	4	+	organism	short_function
Aco002688		motif_sequence	965	4	+	organism	short_function
Aco002688		motif_sequence	1638	4	+	organism	short_function
Aco002688		motif_sequence	1870	4	+	organism	short_function
Aco002688	W box	TTGACC	782	6	+	Arabidopsis thaliana
Aco002688	AT-rich sequence	TAAAATACT	513	9	+	Pisum sativum	element for maximal elicitor-mediated activation (2copies)
Aco002688	MBS	CAACTG	200	6	-	Arabidopsis thaliana	MYB binding site involved in drought-inducibility
Aco002688	MBS	CAACTG	1809	6	+	Arabidopsis thaliana	MYB binding site involved in drought-inducibility
Aco002688	CAAT-box	CAAT	25	4	-	Nicotiana glutinosa
Aco002688	CAAT-box	CCAAT	77	5	-	Arabidopsis thaliana	common cis-acting element in promoter and enhancer regions
Aco002688	CAAT-box	CCAAT	141	5	+	Arabidopsis thaliana	common cis-acting element in promoter and enhancer regions
Aco002688	CAAT-box	CAAT	142	4	+	Nicotiana glutinosa
Aco002688	CAAT-box	CAAAT	261	5	+	Pisum sativum	common cis-acting element in promoter and enhancer regions
Aco002688	CAAT-box	CAAAT	306	5	-	Pisum sativum	common cis-acting element in promoter and enhancer regions
Aco002688	CAAT-box	CAAT	334	4	+	Nicotiana glutinosa
Aco002688	CAAT-box	CAAT	362	4	-	Nicotiana glutinosa
Aco002688	CAAT-box	CAAAT	385	5	+	Pisum sativum	common cis-acting element in promoter and enhancer regions
Aco002688	CAAT-box	CCAAT	495	5	-	Arabidopsis thaliana	common cis-acting element in promoter and enhancer regions
Aco002688	CAAT-box	CAAAT	544	5	-	Pisum sativum	common cis-acting element in promoter and enhancer regions
Aco002688	CAAT-box	CAAT	562	4	-	Nicotiana glutinosa
Aco002688	CAAT-box	CAAAT	613	5	+	Pisum sativum	common cis-acting element in promoter and enhancer regions
Aco002688	CAAT-box	CAAAT	715	5	-	Pisum sativum	common cis-acting element in promoter and enhancer regions
Aco002688	CAAT-box	CCAAT	724	5	-	Arabidopsis thaliana	common cis-acting element in promoter and enhancer regions
Aco002688	CAAT-box	CAAT	732	4	+	Nicotiana glutinosa
Aco002688	CAAT-box	CAAAT	780	5	-	Pisum sativum	common cis-acting element in promoter and enhancer regions
Aco002688	CAAT-box	CAAT	795	4	+	Nicotiana glutinosa
Aco002688	CAAT-box	CAAT	813	4	+	Nicotiana glutinosa
Aco002688	CAAT-box	CAAT	844	4	-	Nicotiana glutinosa
Aco002688	CAAT-box	CAAAT	915	5	+	Pisum sativum	common cis-acting element in promoter and enhancer regions
Aco002688	CAAT-box	CAAAT	933	5	-	Pisum sativum	common cis-acting element in promoter and enhancer regions
Aco002688	CAAT-box	CAAT	1089	4	+	Nicotiana glutinosa
Aco002688	CAAT-box	CAAT	1099	4	-	Nicotiana glutinosa
Aco002688	CAAT-box	CAAT	1212	4	-	Nicotiana glutinosa
Aco002688	CAAT-box	CAAT	1258	4	-	Nicotiana glutinosa
Aco002688	CAAT-box	CAAT	1405	4	+	Nicotiana glutinosa
Aco002688	CAAT-box	CAAAT	1559	5	+	Pisum sativum	common cis-acting element in promoter and enhancer regions
Aco002688	CAAT-box	CCCAATTT	1758	8	-	Arabidopsis thaliana	common cis-acting element in promoter and enhancer regions
Aco002688	CAAT-box	CCAAT	1760	5	-	Arabidopsis thaliana	common cis-acting element in promoter and enhancer regions
Aco002688	CAAT-box	CAAT	1835	4	-	Nicotiana glutinosa
Aco002688	CAAT-box	CAAT	1920	4	-	Nicotiana glutinosa
Aco002688	STRE	AGGGG	289	5	-	Arabidopsis thaliana
Aco002688	STRE	AGGGG	320	5	-	Arabidopsis thaliana
Aco002688	STRE	AGGGG	1330	5	-	Arabidopsis thaliana
Aco002688	STRE	AGGGG	1350	5	-	Arabidopsis thaliana
Aco002688	STRE	AGGGG	1649	5	-	Arabidopsis thaliana
Aco002688	TGACG-motif	TGACG	1438	5	+	Hordeum vulgare	cis-acting regulatory element involved in the MeJA-responsiveness
Aco002688	Unnamed__1	CGTGG	107	5	-	Zea mays
Aco002688	Unnamed__1	CGTGG	1298	5	+	Zea mays
Aco002688	Unnamed__1	CGTGG	1800	5	+	Zea mays
Aco002688	circadian	CAAAGATATC	261	9	+	Lycopersicon esculentum	cis-acting regulatory element involved in circadian control
Aco002688	Box 4	ATTAAT	184	6	+	Petroselinum crispum	part of a conserved DNA module involved in light responsiveness
Aco002688	Box 4	ATTAAT	427	6	+	Petroselinum crispum	part of a conserved DNA module involved in light responsiveness
Aco002688	Box 4	ATTAAT	628	6	+	Petroselinum crispum	part of a conserved DNA module involved in light responsiveness
Aco002688	Box 4	ATTAAT	751	6	+	Petroselinum crispum	part of a conserved DNA module involved in light responsiveness
Aco002688	Box 4	ATTAAT	797	6	+	Petroselinum crispum	part of a conserved DNA module involved in light responsiveness
Aco002688	Box 4	ATTAAT	922	6	+	Petroselinum crispum	part of a conserved DNA module involved in light responsiveness
Aco002688	Box 4	ATTAAT	1889	6	-	Petroselinum crispum	part of a conserved DNA module involved in light responsiveness
Aco002688	as-1	TGACG	1438	5	+	Arabidopsis thaliana
Aco002688	MRE	AACCTAA	230	7	+	Petroselinum crispum	MYB binding site involved in light responsiveness
Aco002688	AE-box	AGAAACAA	944	8	+	Arabidopsis thaliana	part of a module for light response
Aco002688	Myb	CAACTG	200	6	-	Arabidopsis thaliana
Aco002688	Myb	CAACTG	1809	6	+	Arabidopsis thaliana
Aco002688	ABRE	ACGTG	1264	5	+	Arabidopsis thaliana	cis-acting element involved in the abscisic acid responsiveness
Aco002688	ABRE	AACCCGG	1269	7	+	Arabidopsis thaliana	cis-acting element involved in the abscisic acid responsiveness
Aco002688	ABRE	GACACGTGGC	1496	9	-	Triticum aestivum	cis-acting element involved in the abscisic acid responsiveness
Aco002688	ABRE	CACGTG	1498	6	-	Arabidopsis thaliana	cis-acting element involved in the abscisic acid responsiveness
Aco002688	ABRE	ACGTG	1499	5	+	Arabidopsis thaliana	cis-acting element involved in the abscisic acid responsiveness
Aco005573	MYB-like sequence	TAACCA	1378	6	+	Arabidopsis thaliana
Aco005573	TC-rich repeats	GTTTTCTTAC	1810	9	-	Nicotiana tabacum	cis-acting element involved in defense and stress responsiveness
Aco005573		motif_sequence	81	4	+	organism	short_function
Aco005573		motif_sequence	351	4	-	organism	short_function
Aco005573		motif_sequence	1578	4	-	organism	short_function
Aco005573		motif_sequence	1600	4	-	organism	short_function
Aco005573		motif_sequence	1904	4	+	organism	short_function
Aco005573		motif_sequence	1990	4	-	organism	short_function
Aco005573	TCT-motif	TCTTAC	574	6	-	Arabidopsis thaliana	part of a light responsive element
Aco005573	TCT-motif	TCTTAC	1810	6	-	Arabidopsis thaliana	part of a light responsive element
Aco005573	CAAT-box	CAAT	20	4	+	Nicotiana glutinosa
Aco005573	CAAT-box	CAAT	27	4	-	Nicotiana glutinosa
Aco005573	CAAT-box	CAAAT	32	5	+	Pisum sativum	common cis-acting element in promoter and enhancer regions
Aco005573	CAAT-box	CCAAT	103	5	+	Arabidopsis thaliana	common cis-acting element in promoter and enhancer regions
Aco005573	CAAT-box	CAAT	104	4	+	Nicotiana glutinosa
Aco005573	CAAT-box	CAAT	144	4	+	Nicotiana glutinosa
Aco005573	CAAT-box	CAAT	146	4	-	Nicotiana glutinosa
Aco005573	CAAT-box	CAAT	186	4	-	Nicotiana glutinosa
Aco005573	CAAT-box	CAAT	248	4	+	Nicotiana glutinosa
Aco005573	CAAT-box	CAAT	260	4	+	Nicotiana glutinosa
Aco005573	CAAT-box	CCAAT	405	5	-	Arabidopsis thaliana	common cis-acting element in promoter and enhancer regions
Aco005573	CAAT-box	CAAT	541	4	-	Nicotiana glutinosa
Aco005573	CAAT-box	CAAT	596	4	+	Nicotiana glutinosa
Aco005573	CAAT-box	CAAT	609	4	-	Nicotiana glutinosa
Aco005573	CAAT-box	CAAT	702	4	+	Nicotiana glutinosa
Aco005573	CAAT-box	CAAAT	704	5	-	Pisum sativum	common cis-acting element in promoter and enhancer regions
Aco005573	CAAT-box	CCAAT	720	5	-	Arabidopsis thaliana	common cis-acting element in promoter and enhancer regions
Aco005573	CAAT-box	CAAT	857	4	+	Nicotiana glutinosa
Aco005573	CAAT-box	CAAT	929	4	+	Nicotiana glutinosa
Aco005573	CAAT-box	CAAT	1039	4	-	Nicotiana glutinosa
Aco005573	CAAT-box	CAAT	1050	4	-	Nicotiana glutinosa
Aco005573	CAAT-box	CAAT	1116	4	-	Nicotiana glutinosa
Aco005573	CAAT-box	CAAT	1148	4	+	Nicotiana glutinosa
Aco005573	CAAT-box	CAAAT	1299	5	+	Pisum sativum	common cis-acting element in promoter and enhancer regions
Aco005573	CAAT-box	CAAAT	1428	5	+	Pisum sativum	common cis-acting element in promoter and enhancer regions
Aco005573	CAAT-box	CAAAT	1434	5	+	Pisum sativum	common cis-acting element in promoter and enhancer regions
Aco005573	CAAT-box	CAAAT	1462	5	+	Pisum sativum	common cis-acting element in promoter and enhancer regions
Aco005573	CAAT-box	CAAT	1522	4	-	Nicotiana glutinosa
Aco005573	CAAT-box	CAAT	1593	4	+	Nicotiana glutinosa
Aco005573	CAAT-box	CAAT	1648	4	-	Nicotiana glutinosa
Aco005573	CAAT-box	CAAT	1710	4	-	Nicotiana glutinosa
Aco005573	CAAT-box	CAAAT	1722	5	-	Pisum sativum	common cis-acting element in promoter and enhancer regions
Aco005573	CAAT-box	CAAT	1797	4	-	Nicotiana glutinosa
Aco005573	CAAT-box	CAAT	1915	4	+	Nicotiana glutinosa
Aco005573	CAAT-box	CAAAT	1917	5	-	Pisum sativum	common cis-acting element in promoter and enhancer regions
Aco005573	CAAT-box	CAAT	1929	4	-	Nicotiana glutinosa
Aco005573	CAAT-box	CAAT	1964	4	-	Nicotiana glutinosa
Aco005573	AT-rich sequence	TAAAATACT	1324	9	+	Pisum sativum	element for maximal elicitor-mediated activation (2copies)
Aco005573	TGACG-motif	TGACG	677	5	-	Hordeum vulgare	cis-acting regulatory element involved in the MeJA-responsiveness
Aco005573	Unnamed__1	CGTGG	815	5	-	Zea mays
Aco005573	Unnamed__1	CGTGG	1694	5	-	Zea mays
Aco005573	Unnamed__1	GAATTTAATTAA	1742	11	-	Glycine max	60K protein binding site
Aco005573	Unnamed__1	GCCACGTGGC	1822	9	-	Petunia sp.
Aco005573	Unnamed__1	CGTGG	1826	5	+	Zea mays
Aco005573	circadian	CAAAGATATC	211	10	+	Lycopersicon esculentum	cis-acting regulatory element involved in circadian control
Aco005573	STRE	AGGGG	412	5	-	Arabidopsis thaliana
Aco005573	TATA	TATAAAAT	426	8	+	Arabidopsis thaliana
Aco005573	TATA	TATAAAAT	1446	8	-	Arabidopsis thaliana
Aco005573	TATA	TATAAAAT	1470	8	-	Arabidopsis thaliana
Aco005573	ABRE	CGTACGTGCA	814	9	-	Hordeum vulgare	cis-acting element involved in the abscisic acid responsiveness
Aco005573	ABRE	ACGTG	816	5	-	Arabidopsis thaliana	cis-acting element involved in the abscisic acid responsiveness
Aco005573	ABRE	ACGTG	1058	5	+	Arabidopsis thaliana	cis-acting element involved in the abscisic acid responsiveness
Aco005573	ABRE	CGTACGTGCA	1687	9	+	Hordeum vulgare	cis-acting element involved in the abscisic acid responsiveness
Aco005573	ABRE	CACGTG	1695	6	-	Arabidopsis thaliana	cis-acting element involved in the abscisic acid responsiveness
Aco005573	ABRE	ACGTG	1696	5	+	Arabidopsis thaliana	cis-acting element involved in the abscisic acid responsiveness
Aco005573	ABRE	ACGTG	1825	5	+	Arabidopsis thaliana	cis-acting element involved in the abscisic acid responsiveness
Aco005573	Box 4	ATTAAT	293	6	+	Petroselinum crispum	part of a conserved DNA module involved in light responsiveness
Aco005573	Box 4	ATTAAT	1140	6	-	Petroselinum crispum	part of a conserved DNA module involved in light responsiveness
Aco005573	Box 4	ATTAAT	1625	6	-	Petroselinum crispum	part of a conserved DNA module involved in light responsiveness
Aco005573	Box 4	ATTAAT	1640	6	-	Petroselinum crispum	part of a conserved DNA module involved in light responsiveness
Aco005573	as-1	TGACG	677	5	-	Arabidopsis thaliana
Aco005573	AT~TATA-box	TATATA	238	6	+	Arabidopsis thaliana
Aco005573	AT~TATA-box	TATATA	273	6	+	Arabidopsis thaliana
Aco005573	AT~TATA-box	TATATA	356	6	+	Arabidopsis thaliana
Aco005573	AT~TATA-box	TATATA	424	6	+	Arabidopsis thaliana
Aco005573	AT~TATA-box	TATATA	1075	6	-	Arabidopsis thaliana
Aco005573	AT~TATA-box	TATATAAA	1178	8	-	Arabidopsis thaliana
Aco005573	AT~TATA-box	TATATA	1180	6	-	Arabidopsis thaliana
Aco005573	TATA-box	ATATAT	237	6	+	Brassica napus	core promoter element around -30 of transcription start
Aco005573	TATA-box	TATATA	238	6	+	Arabidopsis thaliana	core promoter element around -30 of transcription start
Aco005573	TATA-box	ATATAA	239	6	+	Brassica oleracea	core promoter element around -30 of transcription start
Aco005573	TATA-box	TATA	240	4	+	Arabidopsis thaliana	core promoter element around -30 of transcription start
Aco005573	TATA-box	ATTATA	271	6	+	Brassica napus	core promoter element around -30 of transcription start
Aco005573	TATA-box	TATATAA	272	7	-	Arabidopsis thaliana	core promoter element around -30 of transcription start
Aco005573	TATA-box	TATATA	273	6	+	Arabidopsis thaliana	core promoter element around -30 of transcription start
Aco005573	TATA-box	ATATAA	274	6	+	Brassica oleracea	core promoter element around -30 of transcription start
Aco005573	TATA-box	TATA	275	4	+	Arabidopsis thaliana	core promoter element around -30 of transcription start
Aco005573	TATA-box	ATATAT	289	6	+	Brassica napus	core promoter element around -30 of transcription start
Aco005573	TATA-box	TATA	290	4	+	Arabidopsis thaliana	core promoter element around -30 of transcription start
Aco005573	TATA-box	ATATAT	355	6	+	Brassica napus	core promoter element around -30 of transcription start
Aco005573	TATA-box	TATATA	356	6	+	Arabidopsis thaliana	core promoter element around -30 of transcription start
Aco005573	TATA-box	TATA	358	4	+	Arabidopsis thaliana	core promoter element around -30 of transcription start
Aco005573	TATA-box	TATA	400	4	+	Arabidopsis thaliana	core promoter element around -30 of transcription start
Aco005573	TATA-box	ATTATA	422	6	+	Brassica napus	core promoter element around -30 of transcription start
Aco005573	TATA-box	TATATAA	423	7	-	Arabidopsis thaliana	core promoter element around -30 of transcription start
Aco005573	TATA-box	TATATA	424	6	+	Arabidopsis thaliana	core promoter element around -30 of transcription start
Aco005573	TATA-box	ATATAA	425	6	+	Brassica oleracea	core promoter element around -30 of transcription start
Aco005573	TATA-box	TATA	426	4	+	Arabidopsis thaliana	core promoter element around -30 of transcription start
Aco005573	TATA-box	ATATAT	432	6	+	Brassica napus	core promoter element around -30 of transcription start
Aco005573	TATA-box	TATA	433	4	+	Arabidopsis thaliana	core promoter element around -30 of transcription start
Aco005573	TATA-box	ccTATAAAaa	474	9	-	Arabidopsis thaliana	core promoter element around -30 of transcription start
Aco005573	TATA-box	TATAAAA	475	7	-	Pisum sativum	core promoter element around -30 of transcription start
Aco005573	TATA-box	TATAAA	476	6	-	Helianthus annuus	core promoter element around -30 of transcription start
Aco005573	TATA-box	TATAA	477	5	-	Arabidopsis thaliana	core promoter element around -30 of transcription start
Aco005573	TATA-box	TATA	478	4	+	Arabidopsis thaliana	core promoter element around -30 of transcription start
Aco005573	TATA-box	ATATAT	897	6	+	Brassica napus	core promoter element around -30 of transcription start
Aco005573	TATA-box	TATA	898	4	+	Arabidopsis thaliana	core promoter element around -30 of transcription start
Aco005573	TATA-box	TATA	961	4	+	Arabidopsis thaliana	core promoter element around -30 of transcription start
Aco005573	TATA-box	ATTATA	1073	6	+	Brassica napus	core promoter element around -30 of transcription start
Aco005573	TATA-box	TATATAA	1074	7	-	Arabidopsis thaliana	core promoter element around -30 of transcription start
Aco005573	TATA-box	TATATA	1075	6	-	Arabidopsis thaliana	core promoter element around -30 of transcription start
Aco005573	TATA-box	ATATAA	1076	6	+	Brassica oleracea	core promoter element around -30 of transcription start
Aco005573	TATA-box	TATA	1077	4	-	Arabidopsis thaliana	core promoter element around -30 of transcription start
Aco005573	TATA-box	ATTATA	1130	6	+	Brassica napus	core promoter element around -30 of transcription start
Aco005573	TATA-box	TATAA	1131	5	-	Arabidopsis thaliana	core promoter element around -30 of transcription start
Aco005573	TATA-box	TATA	1132	4	-	Arabidopsis thaliana	core promoter element around -30 of transcription start
Aco005573	TATA-box	ATATAT	1136	6	-	Brassica napus	core promoter element around -30 of transcription start
Aco005573	TATA-box	TATA	1137	4	-	Arabidopsis thaliana	core promoter element around -30 of transcription start
Aco005573	TATA-box	ATATAT	1171	6	-	Brassica napus	core promoter element around -30 of transcription start
Aco005573	TATA-box	TATA	1172	4	-	Arabidopsis thaliana	core promoter element around -30 of transcription start
Aco005573	TATA-box	taTATAAAg	1177	9	-	Lycopersicon esculentum	core promoter element around -30 of transcription start
Aco005573	TATA-box	TATAAA	1178	6	-	Helianthus annuus	core promoter element around -30 of transcription start
Aco005573	TATA-box	TATATAA	1179	7	-	Arabidopsis thaliana	core promoter element around -30 of transcription start
Aco005573	TATA-box	TATATA	1180	6	-	Arabidopsis thaliana	core promoter element around -30 of transcription start
Aco005573	TATA-box	TATA	1182	4	-	Arabidopsis thaliana	core promoter element around -30 of transcription start
Aco005573	TATA-box	TATA	1241	4	-	Arabidopsis thaliana	core promoter element around -30 of transcription start
Aco005573	TATA-box	TATAAAA	1447	7	-	Pisum sativum	core promoter element around -30 of transcription start
Aco005573	TATA-box	TATAAA	1448	6	-	Helianthus annuus	core promoter element around -30 of transcription start
Aco005573	TATA-box	TATAA	1449	5	-	Arabidopsis thaliana	core promoter element around -30 of transcription start
Aco005573	TATA-box	TATA	1450	4	-	Arabidopsis thaliana	core promoter element around -30 of transcription start
Aco005573	TATA-box	TATAAAA	1471	7	-	Pisum sativum	core promoter element around -30 of transcription start
Aco005573	TATA-box	TATAAA	1472	6	-	Helianthus annuus	core promoter element around -30 of transcription start
Aco005573	TATA-box	TATAA	1473	5	-	Arabidopsis thaliana	core promoter element around -30 of transcription start
Aco005573	TATA-box	TATA	1474	4	-	Arabidopsis thaliana	core promoter element around -30 of transcription start
Aco005573	Unnamed__4	CTCC	70	4	+	Petroselinum hortense
Aco005573	Unnamed__4	CTCC	348	4	-	Petroselinum hortense
Aco005573	Unnamed__4	CTCC	829	4	+	Petroselinum hortense
Aco005573	Unnamed__4	CTCC	870	4	+	Petroselinum hortense
Aco005573	Unnamed__4	CTCC	1600	4	-	Petroselinum hortense
Aco005573	Unnamed__4	CTCC	1706	4	+	Petroselinum hortense
Aco005573	Unnamed__4	CTCC	1847	4	-	Petroselinum hortense
Aco005573	ARE	AAACCA	1292	6	-	Zea mays	cis-acting regulatory element essential for the anaerobic induction
Aco005573	CGTCA-motif	CGTCA	677	5	+	Hordeum vulgare	cis-acting regulatory element involved in the MeJA-responsiveness
Aco005573	G-Box	CACGTG	1695	6	-	Pisum sativum	cis-acting regulatory element involved in light responsiveness
Aco005573	I-box	GTATAAGGCC	390	9	+	Larix laricina	part of a light responsive element
Aco005573	MYC	CAATTG	144	6	+	Arabidopsis thaliana
Aco005573	MYC	CATGTG	687	6	-	Arabidopsis thaliana
Aco005573	MYC	CATGTG	689	6	+	Arabidopsis thaliana
Aco005573	ABRE4	CACGTA	816	6	+	Zea mays
Aco005573	ABRE4	CACGTA	1057	6	-	Zea mays
Aco005573	chs-CMA1a	TTACTTAA	442	8	+	Daucus carota	part of a light responsive element
Aco005573	chs-CMA1a	TTACTTAA	1373	8	+	Daucus carota	part of a light responsive element
Aco005573	TCCC-motif	TCTCCCT	69	7	+	Spinacia oleracea	part of a light responsive element
Aco005573	TCCC-motif	TCTCCCT	346	7	-	Spinacia oleracea	part of a light responsive element
Aco005573	re2f-1	GCGGGAAA	1042	8	+	Oryza sativa
Aco005573	ABRE3a	TACGTG	816	6	-	Zea mays
Aco005573	ABRE3a	TACGTG	1057	6	+	Zea mays
Aco005573	G-box	TACGTG	816	6	-	Arabidopsis thaliana	cis-acting regulatory element involved in light responsiveness
Aco005573	G-box	TACGTG	1057	6	+	Arabidopsis thaliana	cis-acting regulatory element involved in light responsiveness
Aco005573	G-box	TAACACGTAG	1694	9	-	Brassica oleracea	cis-acting regulatory element involved in light responsiveness
Aco005573	G-box	CACGTG	1695	6	-	Arabidopsis thaliana	cis-acting regulatory element involved in light responsiveness
Aco005573	G-box	CACGTC	1824	6	-	Zea mays	cis-acting regulatory element involved in light responsiveness
Aco005573	Pc-CMA2a	CAGCCAATCACAG	715	12	-	Pisum sativum	part of a light responsive element
Aco005573	ACA-motif	ATCGACAGCCATT	136	12	+	Zea mays	part of gapA in (gapA-CMA1) involved with light responsiveness
Aco005573	MYB	TAACCA	1378	6	+	Arabidopsis thaliana
Aco005573	GT1-motif	GGTTAA	1377	6	-	Arabidopsis thaliana	light responsive element
Aco005592	GT1-motif	GGTTAA	191	6	+	Arabidopsis thaliana	light responsive element
Aco005592	MYB	CAACCA	104	6	+	Arabidopsis thaliana
Aco005592	MYB	CAACAG	493	6	+	Arabidopsis thaliana
Aco005592	MYB	CAACAG	645	6	+	Arabidopsis thaliana
Aco005592	G-box	CACGAC	1855	6	+	Zea mays	cis-acting regulatory element involved in light responsiveness
Aco005592	LTR	CCGAAA	461	6	-	Hordeum vulgare	cis-acting element involved in low-temperature responsiveness
Aco005592	LTR	CCGAAA	670	6	-	Hordeum vulgare	cis-acting element involved in low-temperature responsiveness
Aco005592	LTR	CCGAAA	1922	6	-	Hordeum vulgare	cis-acting element involved in low-temperature responsiveness
Aco005592	Myb-binding site	CAACAG	493	6	+	Nicotiana tabacum
Aco005592	Myb-binding site	CAACAG	645	6	+	Nicotiana tabacum
Aco005592	CCGTCC-box	CCGTCC	537	6	-	Petroselinum hortense
Aco005592	CCGTCC-box	CCGTCC	576	6	-	Petroselinum hortense
Aco005592	MYC	CAATTG	241	6	+	Arabidopsis thaliana
Aco005592	MYC	CATTTG	1305	6	+	Arabidopsis thaliana
Aco005592	I-box	AGATAAGG	991	8	+	Triticum aestivum	part of a light responsive element
Aco005592	GC-motif	CCCCCG	1965	6	-	Zea mays	enhancer-like element involved in anoxic specific inducibility
Aco005592	AAGAA-motif	GAAAGAA	411	7	-	Avena sativa
Aco005592	AAGAA-motif	GAAAGAA	1118	7	-	Avena sativa
Aco005592	AAGAA-motif	gGTAAAGAAA	1321	9	+	Avena sativa
Aco005592	TCCC-motif	TCTCCCT	649	7	-	Spinacia oleracea	part of a light responsive element
Aco005592	Unnamed__4	CTCC	52	4	-	Petroselinum hortense
Aco005592	Unnamed__4	CTCC	146	4	-	Petroselinum hortense
Aco005592	Unnamed__4	CTCC	286	4	-	Petroselinum hortense
Aco005592	Unnamed__4	CTCC	318	4	+	Petroselinum hortense
Aco005592	Unnamed__4	CTCC	341	4	+	Petroselinum hortense
Aco005592	Unnamed__4	CTCC	405	4	+	Petroselinum hortense
Aco005592	Unnamed__4	CTCC	417	4	+	Petroselinum hortense
Aco005592	Unnamed__4	CTCC	426	4	+	Petroselinum hortense
Aco005592	Unnamed__4	CTCC	434	4	+	Petroselinum hortense
Aco005592	Unnamed__4	CTCC	475	4	-	Petroselinum hortense
Aco005592	Unnamed__4	CTCC	501	4	-	Petroselinum hortense
Aco005592	Unnamed__4	CTCC	534	4	-	Petroselinum hortense
Aco005592	Unnamed__4	CTCC	544	4	-	Petroselinum hortense
Aco005592	Unnamed__4	CTCC	573	4	-	Petroselinum hortense
Aco005592	Unnamed__4	CTCC	631	4	-	Petroselinum hortense
Aco005592	Unnamed__4	CTCC	635	4	-	Petroselinum hortense
Aco005592	Unnamed__4	CTCC	651	4	-	Petroselinum hortense
Aco005592	Unnamed__4	CTCC	660	4	-	Petroselinum hortense
Aco005592	Unnamed__4	CTCC	933	4	+	Petroselinum hortense
Aco005592	Unnamed__4	CTCC	1516	4	-	Petroselinum hortense
Aco005592	Unnamed__4	CTCC	1576	4	+	Petroselinum hortense
Aco005592	Unnamed__4	CTCC	1629	4	+	Petroselinum hortense
Aco005592	Unnamed__4	CTCC	1665	4	-	Petroselinum hortense
Aco005592	Unnamed__4	CTCC	1675	4	+	Petroselinum hortense
Aco005592	Unnamed__4	CTCC	1726	4	+	Petroselinum hortense
Aco005592	Unnamed__4	CTCC	1729	4	+	Petroselinum hortense
Aco005592	Unnamed__4	CTCC	1732	4	+	Petroselinum hortense
Aco005592	Unnamed__4	CTCC	1756	4	-	Petroselinum hortense
Aco005592	Unnamed__4	CTCC	1802	4	+	Petroselinum hortense
Aco005592	Unnamed__4	CTCC	1824	4	-	Petroselinum hortense
Aco005592	Unnamed__4	CTCC	1874	4	+	Petroselinum hortense
Aco005592	Unnamed__4	CTCC	1895	4	+	Petroselinum hortense
Aco005592	Unnamed__4	CTCC	1991	4	-	Petroselinum hortense
Aco005592	TATA-box	TATA	66	4	+	Arabidopsis thaliana	core promoter element around -30 of transcription start
Aco005592	TATA-box	TATAAGAA	165	8	-	Zea mays	core promoter element around -30 of transcription start
Aco005592	TATA-box	TATAA	168	5	-	Arabidopsis thaliana	core promoter element around -30 of transcription start
Aco005592	TATA-box	TATA	169	4	+	Arabidopsis thaliana	core promoter element around -30 of transcription start
Aco005592	TATA-box	TATA	214	4	+	Arabidopsis thaliana	core promoter element around -30 of transcription start
Aco005592	TATA-box	ATATAT	683	6	+	Brassica napus	core promoter element around -30 of transcription start
Aco005592	TATA-box	TATATA	684	6	+	Arabidopsis thaliana	core promoter element around -30 of transcription start
Aco005592	TATA-box	ATATAT	685	6	+	Brassica napus	core promoter element around -30 of transcription start
Aco005592	TATA-box	TATA	686	4	+	Arabidopsis thaliana	core promoter element around -30 of transcription start
Aco005592	TATA-box	TATA	1041	4	-	Arabidopsis thaliana	core promoter element around -30 of transcription start
Aco005592	TATA-box	ATTATA	1074	6	+	Brassica napus	core promoter element around -30 of transcription start
Aco005592	TATA-box	TATAA	1075	5	-	Arabidopsis thaliana	core promoter element around -30 of transcription start
Aco005592	TATA-box	TATA	1076	4	-	Arabidopsis thaliana	core promoter element around -30 of transcription start
Aco005592	TATA-box	TATA	1126	4	-	Arabidopsis thaliana	core promoter element around -30 of transcription start
Aco005592	TATA-box	TATA	1216	4	-	Arabidopsis thaliana	core promoter element around -30 of transcription start
Aco005592	TATA-box	ATTATA	1225	6	+	Brassica napus	core promoter element around -30 of transcription start
Aco005592	TATA-box	TATAA	1226	5	-	Arabidopsis thaliana	core promoter element around -30 of transcription start
Aco005592	TATA-box	TATA	1227	4	-	Arabidopsis thaliana	core promoter element around -30 of transcription start
Aco005592	TATA-box	TACAAAA	1358	7	+	Oryza sativa	core promoter element around -30 of transcription start
Aco005592	TATA-box	TACAAAA	1399	7	+	Oryza sativa	core promoter element around -30 of transcription start
Aco005592	TATA-box	TATAAAA	1436	7	-	Pisum sativum	core promoter element around -30 of transcription start
Aco005592	TATA-box	TATAAA	1437	6	-	Helianthus annuus	core promoter element around -30 of transcription start
Aco005592	TATA-box	TATAA	1438	5	-	Arabidopsis thaliana	core promoter element around -30 of transcription start
Aco005592	TATA-box	TATA	1439	4	-	Arabidopsis thaliana	core promoter element around -30 of transcription start
Aco005592	TATA-box	ATTATA	1451	6	+	Brassica napus	core promoter element around -30 of transcription start
Aco005592	TATA-box	TATAA	1452	5	-	Arabidopsis thaliana	core promoter element around -30 of transcription start
Aco005592	TATA-box	TATA	1453	4	-	Arabidopsis thaliana	core promoter element around -30 of transcription start
Aco005592	TATA-box	TATAAAT	1773	7	-	Brassica juncea	core promoter element around -30 of transcription start
Aco005592	TATA-box	TATAAA	1774	6	-	Helianthus annuus	core promoter element around -30 of transcription start
Aco005592	TATA-box	TATAA	1775	5	-	Arabidopsis thaliana	core promoter element around -30 of transcription start
Aco005592	TATA-box	TATA	1776	4	-	Arabidopsis thaliana	core promoter element around -30 of transcription start
Aco005592	TATA-box	ccTATAAAaa	1831	9	-	Arabidopsis thaliana	core promoter element around -30 of transcription start
Aco005592	AT~TATA-box	TATATA	684	6	+	Arabidopsis thaliana
Aco005592	ARE	AAACCA	904	6	+	Zea mays	cis-acting regulatory element essential for the anaerobic induction
Aco005592	ACE	GACACGTATG	1383	9	-	Petroselinum crispum	cis-acting element involved in light responsiveness
Aco005592	CGTCA-motif	CGTCA	656	5	-	Hordeum vulgare	cis-acting regulatory element involved in the MeJA-responsiveness
Aco005592	CGTCA-motif	CGTCA	704	5	-	Hordeum vulgare	cis-acting regulatory element involved in the MeJA-responsiveness
Aco005592	CGTCA-motif	CGTCA	860	5	+	Hordeum vulgare	cis-acting regulatory element involved in the MeJA-responsiveness
Aco005592	CGTCA-motif	CGTCA	1269	5	+	Hordeum vulgare	cis-acting regulatory element involved in the MeJA-responsiveness
Aco005592	TGA-element	AACGAC	1738	6	-	Brassica oleracea	auxin-responsive element
Aco005592	Myb	CAACTG	1093	6	-	Arabidopsis thaliana
Aco005592	TATA	TATAAAAT	1076	8	+	Arabidopsis thaliana
Aco005592	TATA	TATAAAAT	1435	8	-	Arabidopsis thaliana
Aco005592	TATA	TATAAAAT	1453	8	+	Arabidopsis thaliana
Aco005592	as-1	TGACG	656	5	+	Arabidopsis thaliana
Aco005592	as-1	TGACG	704	5	+	Arabidopsis thaliana
Aco005592	as-1	TGACG	860	5	-	Arabidopsis thaliana
Aco005592	as-1	TGACG	1269	5	-	Arabidopsis thaliana
Aco005592	CCGTCC motif	CCGTCC	537	6	-	Nicotiana tabacum
Aco005592	CCGTCC motif	CCGTCC	576	6	-	Nicotiana tabacum
Aco005592	WUN-motif	CAATTACAT	1468	9	+	Nicotiana glutinosa
Aco005592	WUN-motif	AAATTTCTT	1768	9	-	Nicotiana glutinosa
Aco005592	circadian	CAAAGATATC	118	9	-	Lycopersicon esculentum	cis-acting regulatory element involved in circadian control
Aco005592	Unnamed__1	CGTGG	49	5	+	Zea mays
Aco005592	Unnamed__1	CGTGG	1614	5	-	Zea mays
Aco005592	Unnamed__1	CGTGG	1662	5	+	Zea mays
Aco005592	Unnamed__1	CGTGG	1854	5	-	Zea mays
Aco005592	Unnamed__1	CGTGG	1985	5	+	Zea mays
Aco005592	TGACG-motif	TGACG	656	5	+	Hordeum vulgare	cis-acting regulatory element involved in the MeJA-responsiveness
Aco005592	TGACG-motif	TGACG	704	5	+	Hordeum vulgare	cis-acting regulatory element involved in the MeJA-responsiveness
Aco005592	TGACG-motif	TGACG	860	5	-	Hordeum vulgare	cis-acting regulatory element involved in the MeJA-responsiveness
Aco005592	TGACG-motif	TGACG	1269	5	-	Hordeum vulgare	cis-acting regulatory element involved in the MeJA-responsiveness
Aco005592	STRE	AGGGG	428	5	-	Arabidopsis thaliana
Aco005592	STRE	AGGGG	546	5	+	Arabidopsis thaliana
Aco005592	STRE	AGGGG	662	5	+	Arabidopsis thaliana
Aco005592	STRE	AGGGG	722	5	+	Arabidopsis thaliana
Aco005592	STRE	AGGGG	753	5	+	Arabidopsis thaliana
Aco005592	STRE	AGGGG	1993	5	+	Arabidopsis thaliana
Aco005592	GATA-motif	AAGGATAAGG	989	9	+	Solanum tuberosum	part of a light responsive element
Aco005592	CAAT-box	CAAT	21	4	+	Nicotiana glutinosa
Aco005592	CAAT-box	CAAT	174	4	+	Nicotiana glutinosa
Aco005592	CAAT-box	CCAAT	240	5	+	Arabidopsis thaliana	common cis-acting element in promoter and enhancer regions
Aco005592	CAAT-box	CAAT	241	4	+	Nicotiana glutinosa
Aco005592	CAAT-box	CAAT	243	4	-	Nicotiana glutinosa
Aco005592	CAAT-box	CAAT	327	4	-	Nicotiana glutinosa
Aco005592	CAAT-box	CAAT	387	4	+	Nicotiana glutinosa
Aco005592	CAAT-box	CAAT	863	4	+	Nicotiana glutinosa
Aco005592	CAAT-box	CAAAT	865	5	-	Pisum sativum	common cis-acting element in promoter and enhancer regions
Aco005592	CAAT-box	CAAT	1082	4	-	Nicotiana glutinosa
Aco005592	CAAT-box	CAAT	1145	4	-	Nicotiana glutinosa
Aco005592	CAAT-box	CAAAT	1194	5	+	Pisum sativum	common cis-acting element in promoter and enhancer regions
Aco005592	CAAT-box	CAAAT	1220	5	+	Pisum sativum	common cis-acting element in promoter and enhancer regions
Aco005592	CAAT-box	CAAT	1237	4	-	Nicotiana glutinosa
Aco005592	CAAT-box	CAAT	1259	4	+	Nicotiana glutinosa
Aco005592	CAAT-box	CAAAT	1306	5	-	Pisum sativum	common cis-acting element in promoter and enhancer regions
Aco005592	CAAT-box	CAAAT	1335	5	+	Pisum sativum	common cis-acting element in promoter and enhancer regions
Aco005592	CAAT-box	CCAAT	1467	5	+	Arabidopsis thaliana	common cis-acting element in promoter and enhancer regions
Aco005592	CAAT-box	CAAT	1468	4	+	Nicotiana glutinosa
Aco005592	CAAT-box	CAAAT	1477	5	+	Pisum sativum	common cis-acting element in promoter and enhancer regions
Aco005592	CAAT-box	CAAAT	1644	5	+	Pisum sativum	common cis-acting element in promoter and enhancer regions
Aco005592	CAAT-box	CCAAT	1688	5	+	Arabidopsis thaliana	common cis-acting element in promoter and enhancer regions
Aco005592	CAAT-box	CAAT	1689	4	+	Nicotiana glutinosa
Aco005592	CAAT-box	CAAT	1866	4	+	Nicotiana glutinosa
Aco005592	CAAT-box	CCAAT	1897	5	+	Arabidopsis thaliana	common cis-acting element in promoter and enhancer regions
Aco005592	CAAT-box	CAAT	1898	4	+	Nicotiana glutinosa
Aco005592	CAAT-box	CAAT	1959	4	-	Nicotiana glutinosa
Aco005592	MBS	CAACTG	1093	6	-	Arabidopsis thaliana	MYB binding site involved in drought-inducibility
Aco005592	A-box	CCGTCC	537	6	-	Petroselinum crispum	cis-acting regulatory element
Aco005592	A-box	CCGTCC	576	6	-	Petroselinum crispum	cis-acting regulatory element
Aco005592	Unnamed__6	taTAAATATct	1769	10	-	Zea mays
Aco005592		motif_sequence	149	4	-	organism	short_function
Aco005592		motif_sequence	345	4	+	organism	short_function
Aco005592		motif_sequence	360	4	+	organism	short_function
Aco005592		motif_sequence	403	4	+	organism	short_function
Aco005592		motif_sequence	651	4	-	organism	short_function
Aco005592		motif_sequence	734	4	-	organism	short_function
Aco005592		motif_sequence	882	4	+	organism	short_function
Aco005592		motif_sequence	931	4	+	organism	short_function
Aco005592		motif_sequence	999	4	-	organism	short_function
Aco005592		motif_sequence	1063	4	+	organism	short_function
Aco005592		motif_sequence	1396	4	+	organism	short_function
Aco005592		motif_sequence	1547	4	+	organism	short_function
Aco005592		motif_sequence	1599	4	+	organism	short_function
Aco005592		motif_sequence	1670	4	+	organism	short_function
Aco005592		motif_sequence	1683	4	+	organism	short_function
Aco005592		motif_sequence	1800	4	+	organism	short_function
Aco005592	W box	TTGACC	1863	6	-	Arabidopsis thaliana
Aco005592	TC-rich repeats	GTTTTCTTAC	793	9	-	Nicotiana tabacum	cis-acting element involved in defense and stress responsiveness
Aco005592	plant_AP-2-like	CGACCAGG	1857	8	+	Oryza sativa	?
Aco005592	ERE	ATTTTAAA	250	8	-	Nicotiana glutinos
Aco005592	ERE	ATTTCATA	1003	8	+	Nicotiana glutinos
Aco005592	Sp1	GGGCGG	451	6	-	Oryza sativa	light responsive element
Aco005592	WRE3	CCACCT	381	6	+	Pisum sativum
Aco005592	WRE3	CCACCT	419	6	+	Pisum sativum
Aco005592	WRE3	CCACCT	486	6	-	Pisum sativum
Aco005592	WRE3	CCACCT	619	6	-	Pisum sativum
Aco005862	TATA-box	TATAAAA	41	7	-	Pisum sativum	core promoter element around -30 of transcription start
Aco005862	TATA-box	TATAAA	42	6	-	Helianthus annuus	core promoter element around -30 of transcription start
Aco005862	TATA-box	TATAA	43	5	-	Arabidopsis thaliana	core promoter element around -30 of transcription start
Aco005862	TATA-box	TATA	44	4	+	Arabidopsis thaliana	core promoter element around -30 of transcription start
Aco005862	TATA-box	ATTATA	94	6	+	Brassica napus	core promoter element around -30 of transcription start
Aco005862	TATA-box	TATAA	95	5	-	Arabidopsis thaliana	core promoter element around -30 of transcription start
Aco005862	TATA-box	TATA	96	4	+	Arabidopsis thaliana	core promoter element around -30 of transcription start
Aco005862	TATA-box	TATA	235	4	+	Arabidopsis thaliana	core promoter element around -30 of transcription start
Aco005862	TATA-box	ATATAA	251	6	+	Brassica oleracea	core promoter element around -30 of transcription start
Aco005862	TATA-box	TATA	252	4	+	Arabidopsis thaliana	core promoter element around -30 of transcription start
Aco005862	TATA-box	ATATAA	313	6	+	Brassica oleracea	core promoter element around -30 of transcription start
Aco005862	TATA-box	TATA	314	4	+	Arabidopsis thaliana	core promoter element around -30 of transcription start
Aco005862	TATA-box	ATTATA	367	6	+	Brassica napus	core promoter element around -30 of transcription start
Aco005862	TATA-box	TATATAA	368	7	-	Arabidopsis thaliana	core promoter element around -30 of transcription start
Aco005862	TATA-box	TATATA	369	6	+	Arabidopsis thaliana	core promoter element around -30 of transcription start
Aco005862	TATA-box	ATATAT	370	6	+	Brassica napus	core promoter element around -30 of transcription start
Aco005862	TATA-box	TATATA	371	6	+	Arabidopsis thaliana	core promoter element around -30 of transcription start
Aco005862	TATA-box	ATATAA	372	6	+	Brassica oleracea	core promoter element around -30 of transcription start
Aco005862	TATA-box	TATA	373	4	+	Arabidopsis thaliana	core promoter element around -30 of transcription start
Aco005862	TATA-box	ATATAT	403	6	+	Brassica napus	core promoter element around -30 of transcription start
Aco005862	TATA-box	TATA	404	4	+	Arabidopsis thaliana	core promoter element around -30 of transcription start
Aco005862	TATA-box	ATATAA	411	6	+	Brassica oleracea	core promoter element around -30 of transcription start
Aco005862	TATA-box	TATA	412	4	+	Arabidopsis thaliana	core promoter element around -30 of transcription start
Aco005862	TATA-box	ATATAA	521	6	+	Brassica oleracea	core promoter element around -30 of transcription start
Aco005862	TATA-box	TATA	522	4	+	Arabidopsis thaliana	core promoter element around -30 of transcription start
Aco005862	TATA-box	ATATAA	661	6	+	Brassica oleracea	core promoter element around -30 of transcription start
Aco005862	TATA-box	TATA	662	4	+	Arabidopsis thaliana	core promoter element around -30 of transcription start
Aco005862	TATA-box	ATTATA	689	6	+	Brassica napus	core promoter element around -30 of transcription start
Aco005862	TATA-box	TATAA	690	5	-	Arabidopsis thaliana	core promoter element around -30 of transcription start
Aco005862	TATA-box	TATA	691	4	+	Arabidopsis thaliana	core promoter element around -30 of transcription start
Aco005862	TATA-box	TACAAAA	711	7	-	Oryza sativa	core promoter element around -30 of transcription start
Aco005862	TATA-box	ccTATAAAaa	725	9	+	Arabidopsis thaliana	core promoter element around -30 of transcription start
Aco005862	TATA-box	ATATAT	752	6	+	Brassica napus	core promoter element around -30 of transcription start
Aco005862	TATA-box	TATA	753	4	+	Arabidopsis thaliana	core promoter element around -30 of transcription start
Aco005862	TATA-box	TATA	1175	4	-	Arabidopsis thaliana	core promoter element around -30 of transcription start
Aco005862	TATA-box	TATAA	1192	5	-	Arabidopsis thaliana	core promoter element around -30 of transcription start
Aco005862	TATA-box	TATA	1193	4	-	Arabidopsis thaliana	core promoter element around -30 of transcription start
Aco005862	TATA-box	TATA	1229	4	-	Arabidopsis thaliana	core promoter element around -30 of transcription start
Aco005862	TATA-box	TATACA	1318	6	-	Helianthus annuus	core promoter element around -30 of transcription start
Aco005862	TATA-box	TATA	1320	4	-	Arabidopsis thaliana	core promoter element around -30 of transcription start
Aco005862	TATA-box	TATA	1410	4	-	Arabidopsis thaliana	core promoter element around -30 of transcription start
Aco005862	TATA-box	ATTATA	1429	6	+	Brassica napus	core promoter element around -30 of transcription start
Aco005862	TATA-box	TATAA	1430	5	-	Arabidopsis thaliana	core promoter element around -30 of transcription start
Aco005862	TATA-box	TATA	1431	4	-	Arabidopsis thaliana	core promoter element around -30 of transcription start
Aco005862	TATA-box	ATATAA	1439	6	+	Brassica oleracea	core promoter element around -30 of transcription start
Aco005862	TATA-box	TATA	1440	4	-	Arabidopsis thaliana	core promoter element around -30 of transcription start
Aco005862	TATA-box	TATA	1462	4	-	Arabidopsis thaliana	core promoter element around -30 of transcription start
Aco005862	TATA-box	TATATA	1497	6	-	Arabidopsis thaliana	core promoter element around -30 of transcription start
Aco005862	TATA-box	ATATAA	1498	6	+	Brassica oleracea	core promoter element around -30 of transcription start
Aco005862	TATA-box	TATA	1499	4	-	Arabidopsis thaliana	core promoter element around -30 of transcription start
Aco005862	TATA-box	ATATAA	1694	6	+	Brassica oleracea	core promoter element around -30 of transcription start
Aco005862	TATA-box	TATA	1695	4	-	Arabidopsis thaliana	core promoter element around -30 of transcription start
Aco005862	AT~TATA-box	TATATA	369	6	+	Arabidopsis thaliana
Aco005862	AT~TATA-box	TATATA	371	6	+	Arabidopsis thaliana
Aco005862	AT~TATA-box	TATATA	1497	6	-	Arabidopsis thaliana
Aco005862	Unnamed__12	TCCACGTAGA	1751	9	+	Zea mays
Aco005862	Unnamed__4	CTCC	1360	4	+	Petroselinum hortense
Aco005862	Unnamed__4	CTCC	1745	4	+	Petroselinum hortense
Aco005862	Unnamed__4	CTCC	1856	4	-	Petroselinum hortense
Aco005862	GARE-motif	TCTGTTG	1281	7	+	Brassica oleracea	gibberellin-responsive element
Aco005862	GARE-motif	TCTGTTG	1290	7	+	Brassica oleracea	gibberellin-responsive element
Aco005862	GARE-motif	TCTGTTG	1517	7	-	Brassica oleracea	gibberellin-responsive element
Aco005862	ABRE4	CACGTA	1753	6	+	Zea mays
Aco005862	MYC	CATTTG	792	6	-	Arabidopsis thaliana
Aco005862	MYC	CATTTG	1094	6	+	Arabidopsis thaliana
Aco005862	MYC	CAATTG	1144	6	-	Arabidopsis thaliana
Aco005862	MYC	CATGTG	1274	6	-	Arabidopsis thaliana
Aco005862	I-box	TGATAATGT	1246	9	-	Solanum tuberosum	part of a light responsive element
Aco005862	AAGAA-motif	gGTAAAGAAA	1217	9	-	Avena sativa
Aco005862	AAGAA-motif	gGTAAAGAAA	1301	9	-	Avena sativa
Aco005862	Unnamed__14	TCCACGTAGA	1751	9	+	Zea mays
Aco005862	Unnamed__10	TCCACGTAGA	1751	9	+	Zea mays
Aco005862	ABRE3a	TACGTG	1753	6	-	Zea mays
Aco005862	G-box	CACGAC	1657	6	+	Zea mays	cis-acting regulatory element involved in light responsiveness
Aco005862	G-box	CCACGTAA	1752	8	+	Brassica napus	cis-acting regulatory element involved in light responsiveness
Aco005862	G-box	TACGTG	1753	6	-	Arabidopsis thaliana	cis-acting regulatory element involved in light responsiveness
Aco005862	Myb-binding site	CAACAG	1282	6	-	Nicotiana tabacum
Aco005862	Myb-binding site	CAACAG	1291	6	-	Nicotiana tabacum
Aco005862	Myb-binding site	CAACAG	1517	6	+	Nicotiana tabacum
Aco005862	LTR	CCGAAA	1152	6	+	Hordeum vulgare	cis-acting element involved in low-temperature responsiveness
Aco005862	CAT-box	GCCACT	787	6	-	Arabidopsis thaliana	cis-acting regulatory element related to meristem expression
Aco005862	CAT-box	GCCACT	823	6	-	Arabidopsis thaliana	cis-acting regulatory element related to meristem expression
Aco005862	CAT-box	GCCACT	901	6	-	Arabidopsis thaliana	cis-acting regulatory element related to meristem expression
Aco005862	CAT-box	GCCACT	1731	6	-	Arabidopsis thaliana	cis-acting regulatory element related to meristem expression
Aco005862	TCA	TCATCTTCAT	579	9	-	Pisum sativum
Aco005862	GT1-motif	GGTTAA	1554	6	+	Arabidopsis thaliana	light responsive element
Aco005862	MYB	CAACCA	801	6	-	Arabidopsis thaliana
Aco005862	MYB	CAACCA	918	6	-	Arabidopsis thaliana
Aco005862	MYB	CAACAG	1282	6	-	Arabidopsis thaliana
Aco005862	MYB	CAACAG	1291	6	-	Arabidopsis thaliana
Aco005862	MYB	CAACAG	1517	6	+	Arabidopsis thaliana
Aco005862		motif_sequence	526	4	+	organism	short_function
Aco005862		motif_sequence	1115	4	+	organism	short_function
Aco005862		motif_sequence	1244	4	-	organism	short_function
Aco005862		motif_sequence	1273	4	-	organism	short_function
Aco005862		motif_sequence	1748	4	+	organism	short_function
Aco005862	Unnamed__6	taTAAATATct	252	10	+	Zea mays
Aco005862	WRE3	CCACCT	1770	6	+	Pisum sativum
Aco005862	ATCT-motif	AATCTAATCC	1564	9	+	Pisum sativum	part of a conserved DNA module involved in light responsiveness
Aco005862	ERE	ATTTTAAA	57	8	-	Nicotiana glutinos
Aco005862	CAAT-box	CAAAT	71	5	-	Pisum sativum	common cis-acting element in promoter and enhancer regions
Aco005862	CAAT-box	CAAAT	99	5	-	Pisum sativum	common cis-acting element in promoter and enhancer regions
Aco005862	CAAT-box	CAAT	246	4	+	Nicotiana glutinosa
Aco005862	CAAT-box	CAAAT	266	5	+	Pisum sativum	common cis-acting element in promoter and enhancer regions
Aco005862	CAAT-box	CAAAT	325	5	+	Pisum sativum	common cis-acting element in promoter and enhancer regions
Aco005862	CAAT-box	CAAT	356	4	+	Nicotiana glutinosa
Aco005862	CAAT-box	CAAAT	386	5	-	Pisum sativum	common cis-acting element in promoter and enhancer regions
Aco005862	CAAT-box	CAAT	423	4	+	Nicotiana glutinosa
Aco005862	CAAT-box	CAAT	455	4	+	Nicotiana glutinosa
Aco005862	CAAT-box	CAAT	464	4	+	Nicotiana glutinosa
Aco005862	CAAT-box	CAAAT	468	5	+	Pisum sativum	common cis-acting element in promoter and enhancer regions
Aco005862	CAAT-box	CAAT	489	4	+	Nicotiana glutinosa
Aco005862	CAAT-box	CAAT	535	4	+	Nicotiana glutinosa
Aco005862	CAAT-box	CAAT	544	4	+	Nicotiana glutinosa
Aco005862	CAAT-box	CAAT	648	4	-	Nicotiana glutinosa
Aco005862	CAAT-box	CAAAT	652	5	-	Pisum sativum	common cis-acting element in promoter and enhancer regions
Aco005862	CAAT-box	CAAAT	658	5	+	Pisum sativum	common cis-acting element in promoter and enhancer regions
Aco005862	CAAT-box	CAAAT	667	5	-	Pisum sativum	common cis-acting element in promoter and enhancer regions
Aco005862	CAAT-box	CAAAT	686	5	+	Pisum sativum	common cis-acting element in promoter and enhancer regions
Aco005862	CAAT-box	CAAAT	792	5	+	Pisum sativum	common cis-acting element in promoter and enhancer regions
Aco005862	CAAT-box	CAAAT	1095	5	-	Pisum sativum	common cis-acting element in promoter and enhancer regions
Aco005862	CAAT-box	CCAAT	1103	5	+	Arabidopsis thaliana	common cis-acting element in promoter and enhancer regions
Aco005862	CAAT-box	CAAT	1104	4	+	Nicotiana glutinosa
Aco005862	CAAT-box	CAAT	1144	4	+	Nicotiana glutinosa
Aco005862	CAAT-box	CAAT	1146	4	-	Nicotiana glutinosa
Aco005862	CAAT-box	CAAAT	1395	5	+	Pisum sativum	common cis-acting element in promoter and enhancer regions
Aco005862	CAAT-box	CAAAT	1567	5	+	Pisum sativum	common cis-acting element in promoter and enhancer regions
Aco005862	CAAT-box	CCAAT	1593	5	+	Arabidopsis thaliana	common cis-acting element in promoter and enhancer regions
Aco005862	CAAT-box	CAAT	1594	4	+	Nicotiana glutinosa
Aco005862	CAAT-box	CAAAT	1796	5	+	Pisum sativum	common cis-acting element in promoter and enhancer regions
Aco005862	Unnamed__8	TCCACGTAGA	1751	9	+	Zea mays
Aco005862	WUN-motif	AAATTACTA	1455	9	+	Nicotiana glutinosa
Aco005862	WUN-motif	CCATTTCAA	1477	9	+	Nicotiana glutinosa
Aco005862	DRE core	GCCGAC	1824	6	+	Arabidopsis thaliana
Aco005862	Unnamed__1	CGTGG	1342	5	+	Zea mays
Aco005862	Unnamed__1	CGTGG	1578	5	+	Zea mays
Aco005862	Unnamed__1	CGTGG	1656	5	-	Zea mays
Aco005862	Unnamed__1	CGTGG	1752	5	-	Zea mays
Aco005862	GATA-motif	GATAGGA	240	7	-	Arabidopsis thaliana	part of a light responsive element
Aco005862	STRE	AGGGG	1761	5	-	Arabidopsis thaliana
Aco005862	STRE	AGGGG	1850	5	-	Arabidopsis thaliana
Aco005862	TATA	TATAAAAT	44	8	+	Arabidopsis thaliana
Aco005862	TATA	TATAAAAT	691	8	+	Arabidopsis thaliana
Aco005862	TATA	TATAAAAT	1499	8	+	Arabidopsis thaliana
Aco005862	ABRE	ACGTG	1753	5	-	Arabidopsis thaliana	cis-acting element involved in the abscisic acid responsiveness
Aco005862	Myb	TAACTG	1608	6	-	Arabidopsis thaliana
Aco005862	Box 4	ATTAAT	1701	6	-	Petroselinum crispum	part of a conserved DNA module involved in light responsiveness
Aco006046	MRE	AACCTAA	1869	7	-	Petroselinum crispum	MYB binding site involved in light responsiveness
Aco006046	as-1	TGACG	162	5	+	Arabidopsis thaliana
Aco006046	as-1	TGACG	1392	5	+	Arabidopsis thaliana
Aco006046	as-1	TGACG	1560	5	-	Arabidopsis thaliana
Aco006046	Box 4	ATTAAT	380	6	+	Petroselinum crispum	part of a conserved DNA module involved in light responsiveness
Aco006046	Box 4	ATTAAT	438	6	+	Petroselinum crispum	part of a conserved DNA module involved in light responsiveness
Aco006046	Box 4	ATTAAT	764	6	+	Petroselinum crispum	part of a conserved DNA module involved in light responsiveness
Aco006046	Box 4	ATTAAT	827	6	+	Petroselinum crispum	part of a conserved DNA module involved in light responsiveness
Aco006046	Box 4	ATTAAT	934	6	+	Petroselinum crispum	part of a conserved DNA module involved in light responsiveness
Aco006046	Box 4	ATTAAT	1489	6	-	Petroselinum crispum	part of a conserved DNA module involved in light responsiveness
Aco006046	Box 4	ATTAAT	1635	6	-	Petroselinum crispum	part of a conserved DNA module involved in light responsiveness
Aco006046	ABRE	ACGTG	1642	5	+	Arabidopsis thaliana	cis-acting element involved in the abscisic acid responsiveness
Aco006046	Myb	CAACTG	580	6	-	Arabidopsis thaliana
Aco006046	Myb	CAACTG	595	6	-	Arabidopsis thaliana
Aco006046	Myb	CAACTG	630	6	-	Arabidopsis thaliana
Aco006046	Myb	CAACTG	636	6	+	Arabidopsis thaliana
Aco006046	Myb	CAACTG	1191	6	+	Arabidopsis thaliana
Aco006046	Myb	CAACTG	1200	6	-	Arabidopsis thaliana
Aco006046	Myb	CAACTG	1233	6	+	Arabidopsis thaliana
Aco006046	Myb	CAACTG	1275	6	-	Arabidopsis thaliana
Aco006046	Myb	CAACTG	1330	6	+	Arabidopsis thaliana
Aco006046	Myb	CAACTG	1340	6	-	Arabidopsis thaliana
Aco006046	P-box	CCTTTTG	348	7	+	Oryza sativa	gibberellin-responsive element
Aco006046	TATA	TATAAAAT	67	8	-	Arabidopsis thaliana
Aco006046	TATA	TATAAAAT	975	8	+	Arabidopsis thaliana
Aco006046	TATA	TATAAAAT	1616	8	-	Arabidopsis thaliana
Aco006046	TATA	TATAAAAT	1626	8	-	Arabidopsis thaliana
Aco006046	TATA	TATAAAAT	1737	8	+	Arabidopsis thaliana
Aco006046	Myc	TCTCTTA	515	7	+	Arabidopsis thaliana
Aco006046	STRE	AGGGG	527	5	+	Arabidopsis thaliana
Aco006046	STRE	AGGGG	1482	5	-	Arabidopsis thaliana
Aco006046	STRE	AGGGG	1813	5	+	Arabidopsis thaliana
Aco006046	STRE	AGGGG	1886	5	+	Arabidopsis thaliana
Aco006046	GATA-motif	AAGATAAGATT	1745	10	+	Arabidopsis thaliana	part of a light responsive element
Aco006046	GATA-motif	AAGGATAAGG	1879	9	+	Solanum tuberosum	part of a light responsive element
Aco006046	GATA-motif	GATAGGA	1984	7	+	Arabidopsis thaliana	part of a light responsive element
Aco006046	LAMP-element	CTTTATCA	1659	8	-	Pisum sativum	part of a light responsive element
Aco006046	Unnamed__1	CGTGG	1643	5	+	Zea mays
Aco006046	DRE core	GCCGAC	338	6	-	Arabidopsis thaliana
Aco006046	TGACG-motif	TGACG	162	5	+	Hordeum vulgare	cis-acting regulatory element involved in the MeJA-responsiveness
Aco006046	TGACG-motif	TGACG	1392	5	+	Hordeum vulgare	cis-acting regulatory element involved in the MeJA-responsiveness
Aco006046	TGACG-motif	TGACG	1560	5	-	Hordeum vulgare	cis-acting regulatory element involved in the MeJA-responsiveness
Aco006046	MBS	CAACTG	580	6	-	Arabidopsis thaliana	MYB binding site involved in drought-inducibility
Aco006046	MBS	CAACTG	595	6	-	Arabidopsis thaliana	MYB binding site involved in drought-inducibility
Aco006046	MBS	CAACTG	630	6	-	Arabidopsis thaliana	MYB binding site involved in drought-inducibility
Aco006046	MBS	CAACTG	636	6	+	Arabidopsis thaliana	MYB binding site involved in drought-inducibility
Aco006046	MBS	CAACTG	1191	6	+	Arabidopsis thaliana	MYB binding site involved in drought-inducibility
Aco006046	MBS	CAACTG	1200	6	-	Arabidopsis thaliana	MYB binding site involved in drought-inducibility
Aco006046	MBS	CAACTG	1233	6	+	Arabidopsis thaliana	MYB binding site involved in drought-inducibility
Aco006046	MBS	CAACTG	1275	6	-	Arabidopsis thaliana	MYB binding site involved in drought-inducibility
Aco006046	MBS	CAACTG	1330	6	+	Arabidopsis thaliana	MYB binding site involved in drought-inducibility
Aco006046	MBS	CAACTG	1340	6	-	Arabidopsis thaliana	MYB binding site involved in drought-inducibility
Aco006046	CAAT-box	CAAAT	15	5	-	Pisum sativum	common cis-acting element in promoter and enhancer regions
Aco006046	CAAT-box	CAAT	59	4	+	Nicotiana glutinosa
Aco006046	CAAT-box	CAAT	95	4	-	Nicotiana glutinosa
Aco006046	CAAT-box	CAAT	258	4	-	Nicotiana glutinosa
Aco006046	CAAT-box	CAAAT	263	5	-	Pisum sativum	common cis-acting element in promoter and enhancer regions
Aco006046	CAAT-box	CAAT	284	4	+	Nicotiana glutinosa
Aco006046	CAAT-box	CAAT	306	4	-	Nicotiana glutinosa
Aco006046	CAAT-box	CAAT	369	4	+	Nicotiana glutinosa
Aco006046	CAAT-box	CAAT	458	4	-	Nicotiana glutinosa
Aco006046	CAAT-box	CAAT	508	4	+	Nicotiana glutinosa
Aco006046	CAAT-box	CAAAT	586	5	+	Pisum sativum	common cis-acting element in promoter and enhancer regions
Aco006046	CAAT-box	CAAAT	688	5	-	Pisum sativum	common cis-acting element in promoter and enhancer regions
Aco006046	CAAT-box	CAAT	751	4	-	Nicotiana glutinosa
Aco006046	CAAT-box	CAAAT	917	5	+	Pisum sativum	common cis-acting element in promoter and enhancer regions
Aco006046	CAAT-box	CAAT	1056	4	-	Nicotiana glutinosa
Aco006046	CAAT-box	CAAT	1159	4	-	Nicotiana glutinosa
Aco006046	CAAT-box	CAAAT	1166	5	-	Pisum sativum	common cis-acting element in promoter and enhancer regions
Aco006046	CAAT-box	CCAAT	1215	5	+	Arabidopsis thaliana	common cis-acting element in promoter and enhancer regions
Aco006046	CAAT-box	CAAT	1216	4	+	Nicotiana glutinosa
Aco006046	CAAT-box	CAAAT	1218	5	-	Pisum sativum	common cis-acting element in promoter and enhancer regions
Aco006046	CAAT-box	CAAAT	1243	5	-	Pisum sativum	common cis-acting element in promoter and enhancer regions
Aco006046	CAAT-box	CAAT	1285	4	+	Nicotiana glutinosa
Aco006046	CAAT-box	CAAT	1310	4	-	Nicotiana glutinosa
Aco006046	CAAT-box	CAAAT	1325	5	-	Pisum sativum	common cis-acting element in promoter and enhancer regions
Aco006046	CAAT-box	CAAAT	1346	5	+	Pisum sativum	common cis-acting element in promoter and enhancer regions
Aco006046	CAAT-box	CAAAT	1385	5	-	Pisum sativum	common cis-acting element in promoter and enhancer regions
Aco006046	CAAT-box	CCAAT	1427	5	-	Arabidopsis thaliana	common cis-acting element in promoter and enhancer regions
Aco006046	CAAT-box	CAAT	1467	4	+	Nicotiana glutinosa
Aco006046	CAAT-box	CAAAT	1516	5	+	Pisum sativum	common cis-acting element in promoter and enhancer regions
Aco006046	CAAT-box	CCAAT	1538	5	-	Arabidopsis thaliana	common cis-acting element in promoter and enhancer regions
Aco006046	CAAT-box	CAAAT	1609	5	+	Pisum sativum	common cis-acting element in promoter and enhancer regions
Aco006046	CAAT-box	CAAT	1648	4	+	Nicotiana glutinosa
Aco006046	CAAT-box	CAAT	1657	4	-	Nicotiana glutinosa
Aco006046	CAAT-box	CAAT	1804	4	-	Nicotiana glutinosa
Aco006046	CAAT-box	CAAT	1912	4	-	Nicotiana glutinosa
Aco006046	CAAT-box	CAAT	1923	4	+	Nicotiana glutinosa
Aco006046	CAAT-box	CAAT	1964	4	-	Nicotiana glutinosa
Aco006046	ERE	ATTTTAAA	88	8	+	Nicotiana glutinos
Aco006046	ERE	ATTTTAAA	840	8	-	Nicotiana glutinos
Aco006046	ERE	ATTTTAAA	883	8	-	Nicotiana glutinos
Aco006046	ERE	ATTTTAAA	1006	8	+	Nicotiana glutinos
Aco006046	ERE	ATTTTAAA	1700	8	+	Nicotiana glutinos
Aco006046	TCT-motif	TCTTAC	517	6	+	Arabidopsis thaliana	part of a light responsive element
Aco006046	TCT-motif	TCTTAC	1578	6	+	Arabidopsis thaliana	part of a light responsive element
Aco006046	Unnamed__6	taTAAATATct	802	10	-	Zea mays
Aco006046		motif_sequence	155	4	+	organism	short_function
Aco006046		motif_sequence	800	4	-	organism	short_function
Aco006046		motif_sequence	1981	4	-	organism	short_function
Aco006046	MYB-like sequence	TAACCA	223	6	-	Arabidopsis thaliana
Aco006046	TC-rich repeats	ATTCTCTAAC	513	9	+	Nicotiana tabacum	cis-acting element involved in defense and stress responsiveness
Aco006046	GT1-motif	GGTTAAT	1406	7	-	Avena sativa	light responsive element
Aco006046	GT1-motif	GGTTAA	1407	6	-	Arabidopsis thaliana	light responsive element
Aco006046	GT1-motif	GGTTAA	1826	6	+	Arabidopsis thaliana	light responsive element
Aco006046	MYB	TAACCA	223	6	-	Arabidopsis thaliana
Aco006046	MYB	CAACCA	537	6	-	Arabidopsis thaliana
Aco006046	MYB	CAACCA	1356	6	+	Arabidopsis thaliana
Aco006046	MYB	CAACCA	1540	6	-	Arabidopsis thaliana
Aco006046	TCA	TCATCTTCAT	671	9	-	Pisum sativum
Aco006046	LTR	CCGAAA	145	6	+	Hordeum vulgare	cis-acting element involved in low-temperature responsiveness
Aco006046	LTR	CCGAAA	1411	6	+	Hordeum vulgare	cis-acting element involved in low-temperature responsiveness
Aco006046	AAGAA-motif	gGTAAAGAAA	1100	9	-	Avena sativa
Aco006046	I-box	AGATAAGG	1881	8	+	Triticum aestivum	part of a light responsive element
Aco006046	MYC	CATTTG	586	6	-	Arabidopsis thaliana
Aco006046	MYC	CATTTG	1242	6	+	Arabidopsis thaliana
Aco006046	MYC	CATTTG	1324	6	+	Arabidopsis thaliana
Aco006046	MYC	CATTTG	1346	6	-	Arabidopsis thaliana
Aco006046	G-Box	CACGTT	1641	6	-	Pisum sativum	cis-acting regulatory element involved in light responsiveness
Aco006046	CGTCA-motif	CGTCA	162	5	-	Hordeum vulgare	cis-acting regulatory element involved in the MeJA-responsiveness
Aco006046	CGTCA-motif	CGTCA	1392	5	-	Hordeum vulgare	cis-acting regulatory element involved in the MeJA-responsiveness
Aco006046	CGTCA-motif	CGTCA	1560	5	+	Hordeum vulgare	cis-acting regulatory element involved in the MeJA-responsiveness
Aco006046	TGA-element	AACGAC	1522	6	+	Brassica oleracea	auxin-responsive element
Aco006046	ARE	AAACCA	620	6	-	Zea mays	cis-acting regulatory element essential for the anaerobic induction
Aco006046	ARE	AAACCA	1295	6	+	Zea mays	cis-acting regulatory element essential for the anaerobic induction
Aco006046	Unnamed__4	CTCC	99	4	+	Petroselinum hortense
Aco006046	Unnamed__4	CTCC	346	4	+	Petroselinum hortense
Aco006046	Unnamed__4	CTCC	644	4	-	Petroselinum hortense
Aco006046	Unnamed__4	CTCC	1978	4	-	Petroselinum hortense
Aco006046	Unnamed__4	CTCC	1981	4	-	Petroselinum hortense
Aco006046	Unnamed__4	CTCC	1988	4	-	Petroselinum hortense
Aco006046	TATA-box	TATAAAA	68	7	-	Pisum sativum	core promoter element around -30 of transcription start
Aco006046	TATA-box	TATAAA	69	6	-	Helianthus annuus	core promoter element around -30 of transcription start
Aco006046	TATA-box	TATAA	70	5	-	Arabidopsis thaliana	core promoter element around -30 of transcription start
Aco006046	TATA-box	TATA	71	4	+	Arabidopsis thaliana	core promoter element around -30 of transcription start
Aco006046	TATA-box	TATAAAA	111	7	-	Pisum sativum	core promoter element around -30 of transcription start
Aco006046	TATA-box	TATAAA	112	6	-	Helianthus annuus	core promoter element around -30 of transcription start
Aco006046	TATA-box	TATAA	113	5	-	Arabidopsis thaliana	core promoter element around -30 of transcription start
Aco006046	TATA-box	TATA	114	4	+	Arabidopsis thaliana	core promoter element around -30 of transcription start
Aco006046	TATA-box	ccTATAAAaa	117	9	+	Arabidopsis thaliana	core promoter element around -30 of transcription start
Aco006046	TATA-box	TATA	119	4	+	Arabidopsis thaliana	core promoter element around -30 of transcription start
Aco006046	TATA-box	TACAAAA	206	7	+	Oryza sativa	core promoter element around -30 of transcription start
Aco006046	TATA-box	TACAAAA	350	7	-	Oryza sativa	core promoter element around -30 of transcription start
Aco006046	TATA-box	ATATAA	489	6	+	Brassica oleracea	core promoter element around -30 of transcription start
Aco006046	TATA-box	TATA	490	4	+	Arabidopsis thaliana	core promoter element around -30 of transcription start
Aco006046	TATA-box	ATTATA	500	6	+	Brassica napus	core promoter element around -30 of transcription start
Aco006046	TATA-box	TATAA	501	5	-	Arabidopsis thaliana	core promoter element around -30 of transcription start
Aco006046	TATA-box	TATA	502	4	+	Arabidopsis thaliana	core promoter element around -30 of transcription start
Aco006046	TATA-box	TATAA	523	5	-	Arabidopsis thaliana	core promoter element around -30 of transcription start
Aco006046	TATA-box	TATA	524	4	+	Arabidopsis thaliana	core promoter element around -30 of transcription start
Aco006046	TATA-box	TATA	605	4	+	Arabidopsis thaliana	core promoter element around -30 of transcription start
Aco006046	TATA-box	TATACA	753	6	-	Helianthus annuus	core promoter element around -30 of transcription start
Aco006046	TATA-box	TATA	755	4	+	Arabidopsis thaliana	core promoter element around -30 of transcription start
Aco006046	TATA-box	TATAAATA	783	8	-	Daucus carota	core promoter element around -30 of transcription start
Aco006046	TATA-box	TATAAAT	784	7	-	Brassica juncea	core promoter element around -30 of transcription start
Aco006046	TATA-box	TATAAA	785	6	-	Helianthus annuus	core promoter element around -30 of transcription start
Aco006046	TATA-box	TATAA	786	5	-	Arabidopsis thaliana	core promoter element around -30 of transcription start
Aco006046	TATA-box	TATA	787	4	+	Arabidopsis thaliana	core promoter element around -30 of transcription start
Aco006046	TATA-box	taTATAAAtc	803	9	-	Arabidopsis thaliana	core promoter element around -30 of transcription start
Aco006046	TATA-box	ATATAT	804	6	+	Brassica napus	core promoter element around -30 of transcription start
Aco006046	TATA-box	TATATA	805	6	+	Arabidopsis thaliana	core promoter element around -30 of transcription start
Aco006046	TATA-box	ATATAT	806	6	+	Brassica napus	core promoter element around -30 of transcription start
Aco006046	TATA-box	TATATA	807	6	+	Arabidopsis thaliana	core promoter element around -30 of transcription start
Aco006046	TATA-box	ATATAA	808	6	+	Brassica oleracea	core promoter element around -30 of transcription start
Aco006046	TATA-box	TATA	809	4	+	Arabidopsis thaliana	core promoter element around -30 of transcription start
Aco006046	TATA-box	TATTTAAA	838	8	+	Arabidopsis thaliana	core promoter element around -30 of transcription start
Aco006046	TATA-box	taTATAAAtc	869	9	+	Arabidopsis thaliana	core promoter element around -30 of transcription start
Aco006046	TATA-box	ATTATA	928	6	+	Brassica napus	core promoter element around -30 of transcription start
Aco006046	TATA-box	TATAA	929	5	-	Arabidopsis thaliana	core promoter element around -30 of transcription start
Aco006046	TATA-box	TATA	930	4	+	Arabidopsis thaliana	core promoter element around -30 of transcription start
Aco006046	TATA-box	TATA	975	4	+	Arabidopsis thaliana	core promoter element around -30 of transcription start
Aco006046	TATA-box	TATATTTATATTT	997	13	+	Avena sativa	core promoter element around -30 of transcription start
Aco006046	TATA-box	TATAAATA	999	8	-	Daucus carota	core promoter element around -30 of transcription start
Aco006046	TATA-box	TATAAAT	1000	7	-	Brassica juncea	core promoter element around -30 of transcription start
Aco006046	TATA-box	TATAAA	1001	6	-	Helianthus annuus	core promoter element around -30 of transcription start
Aco006046	TATA-box	TATAA	1002	5	-	Arabidopsis thaliana	core promoter element around -30 of transcription start
Aco006046	TATA-box	TATA	1003	4	-	Arabidopsis thaliana	core promoter element around -30 of transcription start
Aco006046	TATA-box	TATTTAAA	1008	8	-	Arabidopsis thaliana	core promoter element around -30 of transcription start
Aco006046	TATA-box	TATATA	1110	6	-	Arabidopsis thaliana	core promoter element around -30 of transcription start
Aco006046	TATA-box	TATA	1112	4	-	Arabidopsis thaliana	core promoter element around -30 of transcription start
Aco006046	TATA-box	ATATAT	1117	6	-	Brassica napus	core promoter element around -30 of transcription start
Aco006046	TATA-box	TATA	1118	4	-	Arabidopsis thaliana	core promoter element around -30 of transcription start
Aco006046	TATA-box	TACATAAA	1129	8	-	Oryza sativa	core promoter element around -30 of transcription start
Aco006046	TATA-box	TATA	1372	4	-	Arabidopsis thaliana	core promoter element around -30 of transcription start
Aco006046	TATA-box	TATAAAA	1551	7	-	Pisum sativum	core promoter element around -30 of transcription start
Aco006046	TATA-box	TATAAA	1552	6	-	Helianthus annuus	core promoter element around -30 of transcription start
Aco006046	TATA-box	TATAA	1553	5	-	Arabidopsis thaliana	core promoter element around -30 of transcription start
Aco006046	TATA-box	TATA	1554	4	-	Arabidopsis thaliana	core promoter element around -30 of transcription start
Aco006046	TATA-box	TACAAAA	1581	7	+	Oryza sativa	core promoter element around -30 of transcription start
Aco006046	TATA-box	ATTATA	1599	6	+	Brassica napus	core promoter element around -30 of transcription start
Aco006046	TATA-box	TATAA	1600	5	-	Arabidopsis thaliana	core promoter element around -30 of transcription start
Aco006046	TATA-box	TATA	1601	4	-	Arabidopsis thaliana	core promoter element around -30 of transcription start
Aco006046	TATA-box	TATAAAA	1617	7	-	Pisum sativum	core promoter element around -30 of transcription start
Aco006046	TATA-box	TATAAA	1618	6	-	Helianthus annuus	core promoter element around -30 of transcription start
Aco006046	TATA-box	TATAA	1619	5	-	Arabidopsis thaliana	core promoter element around -30 of transcription start
Aco006046	TATA-box	TATA	1620	4	-	Arabidopsis thaliana	core promoter element around -30 of transcription start
Aco006046	TATA-box	TATAAAA	1627	7	-	Pisum sativum	core promoter element around -30 of transcription start
Aco006046	TATA-box	TATAAA	1628	6	-	Helianthus annuus	core promoter element around -30 of transcription start
Aco006046	TATA-box	TATAA	1629	5	-	Arabidopsis thaliana	core promoter element around -30 of transcription start
Aco006046	TATA-box	TATA	1630	4	-	Arabidopsis thaliana	core promoter element around -30 of transcription start
Aco006046	TATA-box	TATATTTATATTT	1680	12	-	Avena sativa	core promoter element around -30 of transcription start
Aco006046	TATA-box	ATATAA	1688	6	+	Brassica oleracea	core promoter element around -30 of transcription start
Aco006046	TATA-box	TATA	1689	4	-	Arabidopsis thaliana	core promoter element around -30 of transcription start
Aco006046	TATA-box	TATAAAT	1693	7	-	Brassica juncea	core promoter element around -30 of transcription start
Aco006046	TATA-box	TATAAA	1694	6	-	Helianthus annuus	core promoter element around -30 of transcription start
Aco006046	TATA-box	TATAA	1695	5	-	Arabidopsis thaliana	core promoter element around -30 of transcription start
Aco006046	TATA-box	TATA	1696	4	-	Arabidopsis thaliana	core promoter element around -30 of transcription start
Aco006046	TATA-box	TATAAAT	1734	7	-	Brassica juncea	core promoter element around -30 of transcription start
Aco006046	TATA-box	TATAAA	1735	6	-	Helianthus annuus	core promoter element around -30 of transcription start
Aco006046	TATA-box	TATAA	1736	5	-	Arabidopsis thaliana	core promoter element around -30 of transcription start
Aco006046	TATA-box	TATA	1737	4	-	Arabidopsis thaliana	core promoter element around -30 of transcription start
Aco006046	TATA-box	ATATAA	1746	6	+	Brassica oleracea	core promoter element around -30 of transcription start
Aco006046	TATA-box	TATA	1747	4	-	Arabidopsis thaliana	core promoter element around -30 of transcription start
Aco006046	TATA-box	taTATAAAtc	1752	9	-	Arabidopsis thaliana	core promoter element around -30 of transcription start
Aco006046	TATA-box	TATAAGAA	1776	8	-	Zea mays	core promoter element around -30 of transcription start
Aco006046	TATA-box	ccTATAAAaa	1778	9	+	Arabidopsis thaliana	core promoter element around -30 of transcription start
Aco006046	TATA-box	TATAA	1779	5	-	Arabidopsis thaliana	core promoter element around -30 of transcription start
Aco006046	TATA-box	TATA	1780	4	-	Arabidopsis thaliana	core promoter element around -30 of transcription start
Aco006046	TATA-box	ATATAT	1848	6	-	Brassica napus	core promoter element around -30 of transcription start
Aco006046	TATA-box	TATATA	1849	6	-	Arabidopsis thaliana	core promoter element around -30 of transcription start
Aco006046	TATA-box	ATATAT	1850	6	-	Brassica napus	core promoter element around -30 of transcription start
Aco006046	TATA-box	TATATA	1851	6	-	Arabidopsis thaliana	core promoter element around -30 of transcription start
Aco006046	TATA-box	TATA	1853	4	-	Arabidopsis thaliana	core promoter element around -30 of transcription start
Aco006046	TATA-box	ccTATAAAaa	1864	9	-	Arabidopsis thaliana	core promoter element around -30 of transcription start
Aco006046	AT~TATA-box	TATATA	805	6	+	Arabidopsis thaliana
Aco006046	AT~TATA-box	TATATA	807	6	+	Arabidopsis thaliana
Aco006046	AT~TATA-box	TATATA	1110	6	-	Arabidopsis thaliana
Aco006046	AT~TATA-box	TATATA	1849	6	-	Arabidopsis thaliana
Aco006046	AT~TATA-box	TATATA	1851	6	-	Arabidopsis thaliana
Aco008819	TGACG-motif	TGACG	70	5	-	Hordeum vulgare	cis-acting regulatory element involved in the MeJA-responsiveness
Aco008819	TGACG-motif	TGACG	824	5	-	Hordeum vulgare	cis-acting regulatory element involved in the MeJA-responsiveness
Aco008819	TGACG-motif	TGACG	1379	5	-	Hordeum vulgare	cis-acting regulatory element involved in the MeJA-responsiveness
Aco008819	Unnamed__1	GCCACGTGGC	86	9	+	Petunia sp.
Aco008819	Unnamed__1	CGTGG	87	5	-	Zea mays
Aco008819	Unnamed__1	CGTGG	90	5	+	Zea mays
Aco008819	Unnamed__1	GCCACGTGGC	834	9	+	Petunia sp.
Aco008819	Unnamed__1	CGTGG	835	5	-	Zea mays
Aco008819	Unnamed__1	CGTGG	838	5	+	Zea mays
Aco008819	WUN-motif	AAATTTCTT	118	9	-	Nicotiana glutinosa
Aco008819	WUN-motif	AAATTTCTT	866	9	-	Nicotiana glutinosa
Aco008819	STRE	AGGGG	254	5	-	Arabidopsis thaliana
Aco008819	STRE	AGGGG	327	5	-	Arabidopsis thaliana
Aco008819	STRE	AGGGG	334	5	-	Arabidopsis thaliana
Aco008819	STRE	AGGGG	1072	5	-	Arabidopsis thaliana
Aco008819	STRE	AGGGG	1081	5	-	Arabidopsis thaliana
Aco008819	STRE	AGGGG	1484	5	+	Arabidopsis thaliana
Aco008819	STRE	AGGGG	1822	5	-	Arabidopsis thaliana
Aco008819	TATA	TATAAAAT	716	8	-	Arabidopsis thaliana
Aco008819	ABRE	CACGTG	88	6	+	Arabidopsis thaliana	cis-acting element involved in the abscisic acid responsiveness
Aco008819	ABRE	ACGTG	89	5	+	Arabidopsis thaliana	cis-acting element involved in the abscisic acid responsiveness
Aco008819	ABRE	CACGTG	836	6	+	Arabidopsis thaliana	cis-acting element involved in the abscisic acid responsiveness
Aco008819	ABRE	ACGTG	837	5	+	Arabidopsis thaliana	cis-acting element involved in the abscisic acid responsiveness
Aco008819	ABRE	ACGTG	1557	5	-	Arabidopsis thaliana	cis-acting element involved in the abscisic acid responsiveness
Aco008819	Myb	TAACTG	495	6	+	Arabidopsis thaliana
Aco008819	MRE	AACCTAA	1298	7	+	Petroselinum crispum	MYB binding site involved in light responsiveness
Aco008819	MRE	AACCTAA	1646	7	+	Petroselinum crispum	MYB binding site involved in light responsiveness
Aco008819	as-1	TGACG	70	5	-	Arabidopsis thaliana
Aco008819	as-1	TGACG	824	5	-	Arabidopsis thaliana
Aco008819	as-1	TGACG	1379	5	-	Arabidopsis thaliana
Aco008819	AT1-motif	AATTATTTTTTATT	886	13	+	Solanum tuberosum	part of a light responsive module
Aco008819		motif_sequence	4	4	-	organism	short_function
Aco008819		motif_sequence	257	4	+	organism	short_function
Aco008819		motif_sequence	330	4	+	organism	short_function
Aco008819		motif_sequence	356	4	+	organism	short_function
Aco008819		motif_sequence	372	4	+	organism	short_function
Aco008819		motif_sequence	422	4	+	organism	short_function
Aco008819		motif_sequence	431	4	+	organism	short_function
Aco008819		motif_sequence	521	4	-	organism	short_function
Aco008819		motif_sequence	1003	4	+	organism	short_function
Aco008819		motif_sequence	1075	4	+	organism	short_function
Aco008819		motif_sequence	1107	4	+	organism	short_function
Aco008819		motif_sequence	1121	4	+	organism	short_function
Aco008819		motif_sequence	1168	4	+	organism	short_function
Aco008819		motif_sequence	1540	4	+	organism	short_function
Aco008819		motif_sequence	1657	4	-	organism	short_function
Aco008819		motif_sequence	1746	4	+	organism	short_function
Aco008819		motif_sequence	1954	4	+	organism	short_function
Aco008819		motif_sequence	1982	4	+	organism	short_function
Aco008819	WRE3	CCACCT	273	6	+	Pisum sativum
Aco008819	WRE3	CCACCT	360	6	+	Pisum sativum
Aco008819	WRE3	CCACCT	1019	6	+	Pisum sativum
Aco008819	WRE3	CCACCT	1111	6	+	Pisum sativum
Aco008819	ERE	ATTTTAAA	12	8	+	Nicotiana glutinos
Aco008819	CAAT-box	CAAT	567	4	+	Nicotiana glutinosa
Aco008819	CAAT-box	CAAT	743	4	-	Nicotiana glutinosa
Aco008819	CAAT-box	CAAAT	755	5	+	Pisum sativum	common cis-acting element in promoter and enhancer regions
Aco008819	CAAT-box	CAAAT	1165	5	+	Pisum sativum	common cis-acting element in promoter and enhancer regions
Aco008819	CAAT-box	CAAT	1186	4	+	Nicotiana glutinosa
Aco008819	CAAT-box	CAAT	1221	4	+	Nicotiana glutinosa
Aco008819	CAAT-box	CAAT	1235	4	+	Nicotiana glutinosa
Aco008819	CAAT-box	CAAT	1274	4	-	Nicotiana glutinosa
Aco008819	CAAT-box	CAAAT	1305	5	-	Pisum sativum	common cis-acting element in promoter and enhancer regions
Aco008819	CAAT-box	CAAT	1450	4	-	Nicotiana glutinosa
Aco008819	CAAT-box	CCAAT	1478	5	-	Arabidopsis thaliana	common cis-acting element in promoter and enhancer regions
Aco008819	CAAT-box	CCAAT	1634	5	+	Arabidopsis thaliana	common cis-acting element in promoter and enhancer regions
Aco008819	CAAT-box	CAAT	1635	4	+	Nicotiana glutinosa
Aco008819	CAAT-box	CAAT	1674	4	-	Nicotiana glutinosa
Aco008819	CAAT-box	CAAT	1694	4	-	Nicotiana glutinosa
Aco008819	CAAT-box	AGCTCAATTTCA	1731	11	+	Daucus carota	common cis-acting element in promoter and enhancer regions
Aco008819	CAAT-box	CAAT	1735	4	+	Nicotiana glutinosa
Aco008819	CAAT-box	CAAT	1814	4	+	Nicotiana glutinosa
Aco008819	CAAT-box	CAAT	1830	4	+	Nicotiana glutinosa
Aco008819	CAAT-box	CAAAT	1932	5	+	Pisum sativum	common cis-acting element in promoter and enhancer regions
Aco008819	CAAT-box	CAAT	1942	4	-	Nicotiana glutinosa
Aco008819	CAAT-box	CAAT	1952	4	+	Nicotiana glutinosa
Aco008819	Unnamed__2	CCCCGG	108	6	-	Zea mays
Aco008819	Unnamed__2	CCCCGG	856	6	-	Zea mays
Aco008819	LTR	CCGAAA	1330	6	-	Hordeum vulgare	cis-acting element involved in low-temperature responsiveness
Aco008819	LTR	CCGAAA	1915	6	-	Hordeum vulgare	cis-acting element involved in low-temperature responsiveness
Aco008819	G-box	GCCACGTGGA	86	9	-	Arabidopsis thaliana	cis-acting regulatory element involved in light responsiveness
Aco008819	G-box	CACGTG	88	6	+	Arabidopsis thaliana	cis-acting regulatory element involved in light responsiveness
Aco008819	G-box	GCCACGTGGA	834	9	-	Arabidopsis thaliana	cis-acting regulatory element involved in light responsiveness
Aco008819	G-box	CACGTG	836	6	+	Arabidopsis thaliana	cis-acting regulatory element involved in light responsiveness
Aco008819	CAT-box	GCCACT	1192	6	-	Arabidopsis thaliana	cis-acting regulatory element related to meristem expression
Aco008819	Box II	CCACGTGGC	87	9	+	Petroselinum crispum	part of a light responsive element
Aco008819	Box II	CCACGTGGC	835	9	+	Petroselinum crispum	part of a light responsive element
Aco008819	TCA	TCATCTTCAT	1511	9	+	Pisum sativum
Aco008819	TATA-box	TATTTAAA	338	8	+	Arabidopsis thaliana	core promoter element around -30 of transcription start
Aco008819	TATA-box	TATAAA	491	6	-	Helianthus annuus	core promoter element around -30 of transcription start
Aco008819	TATA-box	TATAA	492	5	-	Arabidopsis thaliana	core promoter element around -30 of transcription start
Aco008819	TATA-box	TATA	493	4	+	Arabidopsis thaliana	core promoter element around -30 of transcription start
Aco008819	TATA-box	ATATAT	708	6	+	Brassica napus	core promoter element around -30 of transcription start
Aco008819	TATA-box	TATA	709	4	+	Arabidopsis thaliana	core promoter element around -30 of transcription start
Aco008819	TATA-box	TATAAAA	717	7	-	Pisum sativum	core promoter element around -30 of transcription start
Aco008819	TATA-box	TATAAA	718	6	-	Helianthus annuus	core promoter element around -30 of transcription start
Aco008819	TATA-box	TATAA	719	5	-	Arabidopsis thaliana	core promoter element around -30 of transcription start
Aco008819	TATA-box	TATA	720	4	+	Arabidopsis thaliana	core promoter element around -30 of transcription start
Aco008819	TATA-box	taTATAAAtc	722	9	-	Arabidopsis thaliana	core promoter element around -30 of transcription start
Aco008819	TATA-box	TATAAAT	723	7	-	Brassica juncea	core promoter element around -30 of transcription start
Aco008819	TATA-box	TATAAA	724	6	-	Helianthus annuus	core promoter element around -30 of transcription start
Aco008819	TATA-box	TATATAA	725	7	-	Arabidopsis thaliana	core promoter element around -30 of transcription start
Aco008819	TATA-box	TATATA	726	6	+	Arabidopsis thaliana	core promoter element around -30 of transcription start
Aco008819	TATA-box	ATATAA	727	6	+	Brassica oleracea	core promoter element around -30 of transcription start
Aco008819	TATA-box	TATA	728	4	+	Arabidopsis thaliana	core promoter element around -30 of transcription start
Aco008819	TATA-box	ATTATA	758	6	+	Brassica napus	core promoter element around -30 of transcription start
Aco008819	TATA-box	TATATAA	759	7	-	Arabidopsis thaliana	core promoter element around -30 of transcription start
Aco008819	TATA-box	TATATA	760	6	+	Arabidopsis thaliana	core promoter element around -30 of transcription start
Aco008819	TATA-box	ATATAA	761	6	+	Brassica oleracea	core promoter element around -30 of transcription start
Aco008819	TATA-box	TATA	762	4	+	Arabidopsis thaliana	core promoter element around -30 of transcription start
Aco008819	TATA-box	TATTTAAA	1085	8	+	Arabidopsis thaliana	core promoter element around -30 of transcription start
Aco008819	TATA-box	TATACA	1591	6	-	Helianthus annuus	core promoter element around -30 of transcription start
Aco008819	TATA-box	TATA	1593	4	-	Arabidopsis thaliana	core promoter element around -30 of transcription start
Aco008819	TATA-box	ATATAT	1816	6	-	Brassica napus	core promoter element around -30 of transcription start
Aco008819	TATA-box	TATA	1817	4	-	Arabidopsis thaliana	core promoter element around -30 of transcription start
Aco008819	AT~TATA-box	TATATAAA	724	8	-	Arabidopsis thaliana
Aco008819	AT~TATA-box	TATATA	726	6	+	Arabidopsis thaliana
Aco008819	AT~TATA-box	TATATA	760	6	+	Arabidopsis thaliana
Aco008819	Unnamed__4	CTCC	48	4	+	Petroselinum hortense
Aco008819	Unnamed__4	CTCC	103	4	-	Petroselinum hortense
Aco008819	Unnamed__4	CTCC	114	4	+	Petroselinum hortense
Aco008819	Unnamed__4	CTCC	277	4	+	Petroselinum hortense
Aco008819	Unnamed__4	CTCC	315	4	+	Petroselinum hortense
Aco008819	Unnamed__4	CTCC	332	4	+	Petroselinum hortense
Aco008819	Unnamed__4	CTCC	358	4	+	Petroselinum hortense
Aco008819	Unnamed__4	CTCC	374	4	+	Petroselinum hortense
Aco008819	Unnamed__4	CTCC	433	4	+	Petroselinum hortense
Aco008819	Unnamed__4	CTCC	802	4	+	Petroselinum hortense
Aco008819	Unnamed__4	CTCC	851	4	-	Petroselinum hortense
Aco008819	Unnamed__4	CTCC	862	4	+	Petroselinum hortense
Aco008819	Unnamed__4	CTCC	1023	4	+	Petroselinum hortense
Aco008819	Unnamed__4	CTCC	1077	4	+	Petroselinum hortense
Aco008819	Unnamed__4	CTCC	1109	4	+	Petroselinum hortense
Aco008819	Unnamed__4	CTCC	1123	4	+	Petroselinum hortense
Aco008819	Unnamed__4	CTCC	1178	4	+	Petroselinum hortense
Aco008819	Unnamed__4	CTCC	1204	4	-	Petroselinum hortense
Aco008819	Unnamed__4	CTCC	1207	4	-	Petroselinum hortense
Aco008819	Unnamed__4	CTCC	1228	4	+	Petroselinum hortense
Aco008819	Unnamed__4	CTCC	1324	4	+	Petroselinum hortense
Aco008819	Unnamed__4	CTCC	1482	4	-	Petroselinum hortense
Aco008819	Unnamed__4	CTCC	1748	4	+	Petroselinum hortense
Aco008819	Unnamed__4	CTCC	1839	4	-	Petroselinum hortense
Aco008819	Unnamed__4	CTCC	1847	4	+	Petroselinum hortense
Aco008819	Unnamed__4	CTCC	1909	4	+	Petroselinum hortense
Aco008819	Unnamed__4	CTCC	1984	4	+	Petroselinum hortense
Aco008819	TGA-element	AACGAC	578	6	-	Brassica oleracea	auxin-responsive element
Aco008819	ARE	AAACCA	1726	6	+	Zea mays	cis-acting regulatory element essential for the anaerobic induction
Aco008819	CGTCA-motif	CGTCA	70	5	+	Hordeum vulgare	cis-acting regulatory element involved in the MeJA-responsiveness
Aco008819	CGTCA-motif	CGTCA	824	5	+	Hordeum vulgare	cis-acting regulatory element involved in the MeJA-responsiveness
Aco008819	CGTCA-motif	CGTCA	1379	5	+	Hordeum vulgare	cis-acting regulatory element involved in the MeJA-responsiveness
Aco008819	G-Box	CACGTG	88	6	+	Pisum sativum	cis-acting regulatory element involved in light responsiveness
Aco008819	G-Box	CACGTG	836	6	+	Pisum sativum	cis-acting regulatory element involved in light responsiveness
Aco008819	G-Box	CACGTT	1557	6	+	Pisum sativum	cis-acting regulatory element involved in light responsiveness
Aco008819	GC-motif	CCCCCG	976	6	-	Zea mays	enhancer-like element involved in anoxic specific inducibility
Aco008819	ABRE2	CCACGTGG	87	8	+	Zea mays
Aco008819	ABRE2	CCACGTGG	835	8	+	Zea mays
Aco008819	TCCC-motif	TCTCCCT	314	7	+	Spinacia oleracea	part of a light responsive element
Aco009685	GC-motif	CCCCCG	488	6	+	Zea mays	enhancer-like element involved in anoxic specific inducibility
Aco009685	AAGAA-motif	gGTAAAGAAA	256	9	-	Avena sativa
Aco009685	O2-site	GATGATGTGG	1605	9	+	Zea mays	cis-acting regulatory element involved in zein metabolism regulation
Aco009685	TCCC-motif	TCTCCCT	156	7	-	Spinacia oleracea	part of a light responsive element
Aco009685	TCCC-motif	TCTCCCT	738	7	-	Spinacia oleracea	part of a light responsive element
Aco009685	Unnamed__4	CTCC	47	4	+	Petroselinum hortense
Aco009685	Unnamed__4	CTCC	52	4	+	Petroselinum hortense
Aco009685	Unnamed__4	CTCC	123	4	-	Petroselinum hortense
Aco009685	Unnamed__4	CTCC	158	4	-	Petroselinum hortense
Aco009685	Unnamed__4	CTCC	430	4	-	Petroselinum hortense
Aco009685	Unnamed__4	CTCC	439	4	-	Petroselinum hortense
Aco009685	Unnamed__4	CTCC	447	4	-	Petroselinum hortense
Aco009685	Unnamed__4	CTCC	480	4	-	Petroselinum hortense
Aco009685	Unnamed__4	CTCC	568	4	-	Petroselinum hortense
Aco009685	Unnamed__4	CTCC	581	4	-	Petroselinum hortense
Aco009685	Unnamed__4	CTCC	615	4	+	Petroselinum hortense
Aco009685	Unnamed__4	CTCC	632	4	-	Petroselinum hortense
Aco009685	Unnamed__4	CTCC	639	4	+	Petroselinum hortense
Aco009685	Unnamed__4	CTCC	660	4	+	Petroselinum hortense
Aco009685	Unnamed__4	CTCC	713	4	-	Petroselinum hortense
Aco009685	Unnamed__4	CTCC	740	4	-	Petroselinum hortense
Aco009685	Unnamed__4	CTCC	761	4	-	Petroselinum hortense
Aco009685	Unnamed__4	CTCC	1162	4	+	Petroselinum hortense
Aco009685	Unnamed__4	CTCC	1168	4	+	Petroselinum hortense
Aco009685	Unnamed__4	CTCC	1174	4	+	Petroselinum hortense
Aco009685	Unnamed__4	CTCC	1180	4	+	Petroselinum hortense
Aco009685	Unnamed__4	CTCC	1226	4	+	Petroselinum hortense
Aco009685	Unnamed__4	CTCC	1391	4	+	Petroselinum hortense
Aco009685	Unnamed__4	CTCC	1803	4	+	Petroselinum hortense
Aco009685	Unnamed__4	CTCC	1828	4	+	Petroselinum hortense
Aco009685	Unnamed__4	CTCC	1839	4	+	Petroselinum hortense
Aco009685	TATA-box	ATATAA	74	6	+	Brassica oleracea	core promoter element around -30 of transcription start
Aco009685	TATA-box	TATA	75	4	+	Arabidopsis thaliana	core promoter element around -30 of transcription start
Aco009685	TATA-box	TATA	170	4	+	Arabidopsis thaliana	core promoter element around -30 of transcription start
Aco009685	TATA-box	TATAAAA	230	7	-	Pisum sativum	core promoter element around -30 of transcription start
Aco009685	TATA-box	TATAAA	231	6	-	Helianthus annuus	core promoter element around -30 of transcription start
Aco009685	TATA-box	TATAA	232	5	-	Arabidopsis thaliana	core promoter element around -30 of transcription start
Aco009685	TATA-box	TATA	233	4	+	Arabidopsis thaliana	core promoter element around -30 of transcription start
Aco009685	TATA-box	TATA	299	4	+	Arabidopsis thaliana	core promoter element around -30 of transcription start
Aco009685	TATA-box	TATA	314	4	+	Arabidopsis thaliana	core promoter element around -30 of transcription start
Aco009685	TATA-box	TATA	773	4	+	Arabidopsis thaliana	core promoter element around -30 of transcription start
Aco009685	TATA-box	TATAA	802	5	-	Arabidopsis thaliana	core promoter element around -30 of transcription start
Aco009685	TATA-box	TATATTTATATTT	803	12	+	Avena sativa	core promoter element around -30 of transcription start
Aco009685	TATA-box	taTATAAAtc	836	9	-	Arabidopsis thaliana	core promoter element around -30 of transcription start
Aco009685	TATA-box	TATAAAT	837	7	-	Brassica juncea	core promoter element around -30 of transcription start
Aco009685	TATA-box	TATAAA	838	6	-	Helianthus annuus	core promoter element around -30 of transcription start
Aco009685	TATA-box	TATAA	839	5	-	Arabidopsis thaliana	core promoter element around -30 of transcription start
Aco009685	TATA-box	TATA	840	4	+	Arabidopsis thaliana	core promoter element around -30 of transcription start
Aco009685	TATA-box	ATATAA	871	6	+	Brassica oleracea	core promoter element around -30 of transcription start
Aco009685	TATA-box	TATA	872	4	+	Arabidopsis thaliana	core promoter element around -30 of transcription start
Aco009685	TATA-box	TATAAAA	899	7	-	Pisum sativum	core promoter element around -30 of transcription start
Aco009685	TATA-box	TATAAA	900	6	-	Helianthus annuus	core promoter element around -30 of transcription start
Aco009685	TATA-box	TATAA	901	5	-	Arabidopsis thaliana	core promoter element around -30 of transcription start
Aco009685	TATA-box	TATA	902	4	+	Arabidopsis thaliana	core promoter element around -30 of transcription start
Aco009685	TATA-box	TATAAA	986	6	-	Helianthus annuus	core promoter element around -30 of transcription start
Aco009685	TATA-box	TATAA	987	5	-	Arabidopsis thaliana	core promoter element around -30 of transcription start
Aco009685	TATA-box	TATA	988	4	+	Arabidopsis thaliana	core promoter element around -30 of transcription start
Aco009685	TATA-box	TATAAAT	1071	7	-	Brassica juncea	core promoter element around -30 of transcription start
Aco009685	TATA-box	TATAAA	1072	6	-	Helianthus annuus	core promoter element around -30 of transcription start
Aco009685	TATA-box	TATAA	1073	5	-	Arabidopsis thaliana	core promoter element around -30 of transcription start
Aco009685	TATA-box	TATA	1074	4	-	Arabidopsis thaliana	core promoter element around -30 of transcription start
Aco009685	TATA-box	ATTATA	1087	6	+	Brassica napus	core promoter element around -30 of transcription start
Aco009685	TATA-box	TATAA	1088	5	-	Arabidopsis thaliana	core promoter element around -30 of transcription start
Aco009685	TATA-box	TATA	1089	4	-	Arabidopsis thaliana	core promoter element around -30 of transcription start
Aco009685	TATA-box	ccTATAAAaa	1208	9	+	Arabidopsis thaliana	core promoter element around -30 of transcription start
Aco009685	TATA-box	TATAAAA	1233	7	-	Pisum sativum	core promoter element around -30 of transcription start
Aco009685	TATA-box	TATAAA	1234	6	-	Helianthus annuus	core promoter element around -30 of transcription start
Aco009685	TATA-box	TATAA	1235	5	-	Arabidopsis thaliana	core promoter element around -30 of transcription start
Aco009685	TATA-box	TATA	1236	4	-	Arabidopsis thaliana	core promoter element around -30 of transcription start
Aco009685	TATA-box	TATAAAT	1273	7	-	Brassica juncea	core promoter element around -30 of transcription start
Aco009685	TATA-box	TATAAA	1274	6	-	Helianthus annuus	core promoter element around -30 of transcription start
Aco009685	TATA-box	TATAA	1275	5	-	Arabidopsis thaliana	core promoter element around -30 of transcription start
Aco009685	TATA-box	TATA	1276	4	-	Arabidopsis thaliana	core promoter element around -30 of transcription start
Aco009685	TATA-box	TATA	1306	4	-	Arabidopsis thaliana	core promoter element around -30 of transcription start
Aco009685	TATA-box	TACAAAA	1334	7	+	Oryza sativa	core promoter element around -30 of transcription start
Aco009685	TATA-box	ATATAT	1415	6	-	Brassica napus	core promoter element around -30 of transcription start
Aco009685	TATA-box	TATA	1416	4	-	Arabidopsis thaliana	core promoter element around -30 of transcription start
Aco009685	TATA-box	ATTATA	1464	6	+	Brassica napus	core promoter element around -30 of transcription start
Aco009685	TATA-box	TATAA	1465	5	-	Arabidopsis thaliana	core promoter element around -30 of transcription start
Aco009685	TATA-box	TATA	1466	4	-	Arabidopsis thaliana	core promoter element around -30 of transcription start
Aco009685	TATA-box	ATATAT	1481	6	-	Brassica napus	core promoter element around -30 of transcription start
Aco009685	TATA-box	TATA	1482	4	-	Arabidopsis thaliana	core promoter element around -30 of transcription start
Aco009685	TATA-box	TATAAATA	1490	8	-	Daucus carota	core promoter element around -30 of transcription start
Aco009685	TATA-box	TATAAAT	1491	7	-	Brassica juncea	core promoter element around -30 of transcription start
Aco009685	TATA-box	TATAAA	1492	6	-	Helianthus annuus	core promoter element around -30 of transcription start
Aco009685	TATA-box	TATAA	1493	5	-	Arabidopsis thaliana	core promoter element around -30 of transcription start
Aco009685	TATA-box	TATA	1494	4	-	Arabidopsis thaliana	core promoter element around -30 of transcription start
Aco009685	TATA-box	TATTTAAA	1537	8	+	Arabidopsis thaliana	core promoter element around -30 of transcription start
Aco009685	TATA-box	ATTATA	1557	6	+	Brassica napus	core promoter element around -30 of transcription start
Aco009685	TATA-box	TATAA	1558	5	-	Arabidopsis thaliana	core promoter element around -30 of transcription start
Aco009685	TATA-box	TATA	1559	4	-	Arabidopsis thaliana	core promoter element around -30 of transcription start
Aco009685	TATA-box	TATTTAAA	1567	8	+	Arabidopsis thaliana	core promoter element around -30 of transcription start
Aco009685	TATA-box	TATAAAT	1575	7	-	Brassica juncea	core promoter element around -30 of transcription start
Aco009685	TATA-box	TATAAA	1576	6	-	Helianthus annuus	core promoter element around -30 of transcription start
Aco009685	TATA-box	TATAA	1577	5	-	Arabidopsis thaliana	core promoter element around -30 of transcription start
Aco009685	TATA-box	TATA	1578	4	-	Arabidopsis thaliana	core promoter element around -30 of transcription start
Aco009685	CGTCA-motif	CGTCA	1613	5	+	Hordeum vulgare	cis-acting regulatory element involved in the MeJA-responsiveness
Aco009685	TGA-element	AACGAC	798	6	-	Brassica oleracea	auxin-responsive element
Aco009685	GC-repeat	GGCCTCGCCACG	526	11	-	Oryza sativa	?
Aco009685	MYB	TAACCA	1043	6	+	Arabidopsis thaliana
Aco009685	MYB	CAACAG	1632	6	-	Arabidopsis thaliana
Aco009685	MYB	CAACAG	1668	6	-	Arabidopsis thaliana
Aco009685	MYB	CAACCA	1676	6	+	Arabidopsis thaliana
Aco009685	GT1-motif	GGTTAA	355	6	+	Arabidopsis thaliana	light responsive element
Aco009685	GT1-motif	GGTTAA	1042	6	-	Arabidopsis thaliana	light responsive element
Aco009685	GT1-motif	GGTTAA	1813	6	-	Arabidopsis thaliana	light responsive element
Aco009685	Myb-binding site	CAACAG	1632	6	-	Nicotiana tabacum
Aco009685	Myb-binding site	CAACAG	1668	6	-	Nicotiana tabacum
Aco009685	LTR	CCGAAA	218	6	-	Hordeum vulgare	cis-acting element involved in low-temperature responsiveness
Aco009685	G-box	CACGAC	1367	6	+	Zea mays	cis-acting regulatory element involved in light responsiveness
Aco009685	AT-rich element	ATAGAAATCAA	834	10	-	Glycine max	binding site of AT-rich DNA binding protein (ATBP-1)
Aco009685	CAAT-box	CAAT	1	4	-	Nicotiana glutinosa
Aco009685	CAAT-box	CAAT	13	4	-	Nicotiana glutinosa
Aco009685	CAAT-box	CAAT	36	4	-	Nicotiana glutinosa
Aco009685	CAAT-box	CAAAT	114	5	+	Pisum sativum	common cis-acting element in promoter and enhancer regions
Aco009685	CAAT-box	CCAAT	119	5	-	Arabidopsis thaliana	common cis-acting element in promoter and enhancer regions
Aco009685	CAAT-box	CAAT	212	4	+	Nicotiana glutinosa
Aco009685	CAAT-box	CAAT	238	4	-	Nicotiana glutinosa
Aco009685	CAAT-box	CAAAT	319	5	-	Pisum sativum	common cis-acting element in promoter and enhancer regions
Aco009685	CAAT-box	CCAAT	369	5	-	Arabidopsis thaliana	common cis-acting element in promoter and enhancer regions
Aco009685	CAAT-box	CAAAT	705	5	-	Pisum sativum	common cis-acting element in promoter and enhancer regions
Aco009685	CAAT-box	CCAAT	794	5	-	Arabidopsis thaliana	common cis-acting element in promoter and enhancer regions
Aco009685	CAAT-box	CAAAT	812	5	-	Pisum sativum	common cis-acting element in promoter and enhancer regions
Aco009685	CAAT-box	CAAAT	832	5	-	Pisum sativum	common cis-acting element in promoter and enhancer regions
Aco009685	CAAT-box	CAAT	843	4	-	Nicotiana glutinosa
Aco009685	CAAT-box	CAAT	937	4	+	Nicotiana glutinosa
Aco009685	CAAT-box	CAAT	965	4	+	Nicotiana glutinosa
Aco009685	CAAT-box	CAAT	999	4	-	Nicotiana glutinosa
Aco009685	CAAT-box	CAAT	1241	4	+	Nicotiana glutinosa
Aco009685	CAAT-box	CAAT	1251	4	+	Nicotiana glutinosa
Aco009685	CAAT-box	CAAT	1387	4	+	Nicotiana glutinosa
Aco009685	CAAT-box	CAAT	1456	4	+	Nicotiana glutinosa
Aco009685	CAAT-box	CAAT	1477	4	-	Nicotiana glutinosa
Aco009685	CAAT-box	CAAT	1485	4	-	Nicotiana glutinosa
Aco009685	CAAT-box	CCAAT	1679	5	+	Arabidopsis thaliana	common cis-acting element in promoter and enhancer regions
Aco009685	CAAT-box	CAAT	1680	4	+	Nicotiana glutinosa
Aco009685	CAAT-box	CCAAT	1952	5	+	Arabidopsis thaliana	common cis-acting element in promoter and enhancer regions
Aco009685	CAAT-box	CAAT	1953	4	+	Nicotiana glutinosa
Aco009685	Unnamed__2	CCCCGG	525	6	-	Zea mays
Aco009685	MBS	CAACTG	335	6	-	Arabidopsis thaliana	MYB binding site involved in drought-inducibility
Aco009685	MYB-like sequence	TAACCA	1043	6	+	Arabidopsis thaliana
Aco009685		motif_sequence	45	4	+	organism	short_function
Aco009685		motif_sequence	50	4	+	organism	short_function
Aco009685		motif_sequence	80	4	+	organism	short_function
Aco009685		motif_sequence	158	4	-	organism	short_function
Aco009685		motif_sequence	198	4	+	organism	short_function
Aco009685		motif_sequence	463	4	+	organism	short_function
Aco009685		motif_sequence	637	4	+	organism	short_function
Aco009685		motif_sequence	678	4	-	organism	short_function
Aco009685		motif_sequence	740	4	-	organism	short_function
Aco009685		motif_sequence	761	4	-	organism	short_function
Aco009685		motif_sequence	974	4	+	organism	short_function
Aco009685		motif_sequence	1224	4	+	organism	short_function
Aco009685		motif_sequence	1389	4	+	organism	short_function
Aco009685		motif_sequence	1845	4	-	organism	short_function
Aco009685		motif_sequence	1947	4	+	organism	short_function
Aco009685		motif_sequence	1967	4	+	organism	short_function
Aco009685	ERE	ATTTTAAA	1299	8	-	Nicotiana glutinos
Aco009685	ERE	ATTTTAAA	1539	8	-	Nicotiana glutinos
Aco009685	ERE	ATTTTAAA	1546	8	-	Nicotiana glutinos
Aco009685	ERE	ATTTTAAA	1569	8	-	Nicotiana glutinos
Aco009685	Sp1	GGGCGG	1741	6	-	Oryza sativa	light responsive element
Aco009685	Myb	CAACTG	335	6	-	Arabidopsis thaliana
Aco009685	ABRE	GCCGCGTGGC	1693	9	-	Oryza sativa	cis-acting element involved in the abscisic acid responsiveness
Aco009685	TATA	TATAAAAT	229	8	-	Arabidopsis thaliana
Aco009685	TATA	TATAAAAT	898	8	-	Arabidopsis thaliana
Aco009685	Box 4	ATTAAT	286	6	+	Petroselinum crispum	part of a conserved DNA module involved in light responsiveness
Aco009685	Box 4	ATTAAT	890	6	+	Petroselinum crispum	part of a conserved DNA module involved in light responsiveness
Aco009685	Box 4	ATTAAT	1036	6	-	Petroselinum crispum	part of a conserved DNA module involved in light responsiveness
Aco009685	AE-box	AGAAACAA	186	8	+	Arabidopsis thaliana	part of a module for light response
Aco009685	as-1	TGACG	1613	5	-	Arabidopsis thaliana
Aco009685	Unnamed__1	CGTGG	671	5	-	Zea mays
Aco009685	Unnamed__1	CGTGG	1694	5	-	Zea mays
Aco009685	Unnamed__1	CGTGG	1820	5	+	Zea mays
Aco009685	TGACG-motif	TGACG	1613	5	-	Hordeum vulgare	cis-acting regulatory element involved in the MeJA-responsiveness
Aco009685	WUN-motif	AAATTACTA	827	9	-	Nicotiana glutinosa
Aco009685	WUN-motif	AAATTACT	828	8	-	Nicotiana glutinosa
Aco009685	WUN-motif	AAATTACT	1077	8	+	Nicotiana glutinosa
Aco009685	WUN-motif	AAATTACT	1113	8	-	Nicotiana glutinosa
Aco009685	GATA-motif	GATAGGA	628	7	+	Arabidopsis thaliana	part of a light responsive element
Aco009685	STRE	AGGGG	352	5	+	Arabidopsis thaliana
Aco009685	STRE	AGGGG	1836	5	-	Arabidopsis thaliana
Aco013873		motif_sequence	227	4	-	organism	short_function
Aco013873		motif_sequence	281	4	-	organism	short_function
Aco013873		motif_sequence	640	4	-	organism	short_function
Aco013873		motif_sequence	1695	4	-	organism	short_function
Aco013873		motif_sequence	1839	4	+	organism	short_function
Aco013873		motif_sequence	1879	4	+	organism	short_function
Aco013873		motif_sequence	1916	4	+	organism	short_function
Aco013873	Unnamed__6	taTAAATATct	704	10	+	Zea mays
Aco013873	TCT-motif	TCTTAC	1050	6	+	Arabidopsis thaliana	part of a light responsive element
Aco013873	ERE	ATTTTAAA	395	8	-	Nicotiana glutinos
Aco013873	ERE	ATTTTAAA	478	8	+	Nicotiana glutinos
Aco013873	ERE	ATTTTAAA	565	8	+	Nicotiana glutinos
Aco013873	ERE	ATTTTAAA	567	8	-	Nicotiana glutinos
Aco013873	ERE	ATTTTAAA	1141	8	+	Nicotiana glutinos
Aco013873	Sp1	GGGCGG	1787	6	-	Oryza sativa	light responsive element
Aco013873	CAAT-box	CAAT	167	4	+	Nicotiana glutinosa
Aco013873	CAAT-box	CAAT	192	4	+	Nicotiana glutinosa
Aco013873	CAAT-box	CAAT	276	4	-	Nicotiana glutinosa
Aco013873	CAAT-box	CAAAT	295	5	+	Pisum sativum	common cis-acting element in promoter and enhancer regions
Aco013873	CAAT-box	CCAAT	325	5	+	Arabidopsis thaliana	common cis-acting element in promoter and enhancer regions
Aco013873	CAAT-box	CAAT	326	4	+	Nicotiana glutinosa
Aco013873	CAAT-box	CAAAT	391	5	+	Pisum sativum	common cis-acting element in promoter and enhancer regions
Aco013873	CAAT-box	CAAAT	445	5	+	Pisum sativum	common cis-acting element in promoter and enhancer regions
Aco013873	CAAT-box	CAAAT	448	5	-	Pisum sativum	common cis-acting element in promoter and enhancer regions
Aco013873	CAAT-box	CAAAT	467	5	-	Pisum sativum	common cis-acting element in promoter and enhancer regions
Aco013873	CAAT-box	CAAAT	488	5	+	Pisum sativum	common cis-acting element in promoter and enhancer regions
Aco013873	CAAT-box	CAAT	523	4	-	Nicotiana glutinosa
Aco013873	CAAT-box	CAAAT	575	5	+	Pisum sativum	common cis-acting element in promoter and enhancer regions
Aco013873	CAAT-box	CAAAT	589	5	+	Pisum sativum	common cis-acting element in promoter and enhancer regions
Aco013873	CAAT-box	CAAAT	662	5	-	Pisum sativum	common cis-acting element in promoter and enhancer regions
Aco013873	CAAT-box	CAAAT	782	5	-	Pisum sativum	common cis-acting element in promoter and enhancer regions
Aco013873	CAAT-box	CAAAT	849	5	+	Pisum sativum	common cis-acting element in promoter and enhancer regions
Aco013873	CAAT-box	CAAAT	946	5	-	Pisum sativum	common cis-acting element in promoter and enhancer regions
Aco013873	CAAT-box	CAAT	979	4	-	Nicotiana glutinosa
Aco013873	CAAT-box	CAAAT	1064	5	-	Pisum sativum	common cis-acting element in promoter and enhancer regions
Aco013873	CAAT-box	CAAT	1091	4	+	Nicotiana glutinosa
Aco013873	CAAT-box	CAAT	1104	4	-	Nicotiana glutinosa
Aco013873	CAAT-box	CAAAT	1173	5	+	Pisum sativum	common cis-acting element in promoter and enhancer regions
Aco013873	CAAT-box	CAAAT	1233	5	+	Pisum sativum	common cis-acting element in promoter and enhancer regions
Aco013873	CAAT-box	CAAAT	1265	5	-	Pisum sativum	common cis-acting element in promoter and enhancer regions
Aco013873	CAAT-box	CAAT	1384	4	+	Nicotiana glutinosa
Aco013873	CAAT-box	CAAAT	1454	5	+	Pisum sativum	common cis-acting element in promoter and enhancer regions
Aco013873	CAAT-box	CAAAT	1482	5	+	Pisum sativum	common cis-acting element in promoter and enhancer regions
Aco013873	CAAT-box	CCAAT	1490	5	-	Arabidopsis thaliana	common cis-acting element in promoter and enhancer regions
Aco013873	CAAT-box	CAAAT	1990	5	-	Pisum sativum	common cis-acting element in promoter and enhancer regions
Aco013873	A-box	CCGTCC	1769	6	+	Petroselinum crispum	cis-acting regulatory element
Aco013873	MBS	CAACTG	205	6	-	Arabidopsis thaliana	MYB binding site involved in drought-inducibility
Aco013873	Unnamed__1	GAATTTAATTAA	578	11	-	Glycine max	60K protein binding site
Aco013873	Unnamed__1	CGTGG	1573	5	+	Zea mays
Aco013873	Unnamed__1	CGTGG	1708	5	-	Zea mays
Aco013873	DRE core	GCCGAC	1688	6	-	Arabidopsis thaliana
Aco013873	TGACG-motif	TGACG	209	5	+	Hordeum vulgare	cis-acting regulatory element involved in the MeJA-responsiveness
Aco013873	STRE	AGGGG	38	5	+	Arabidopsis thaliana
Aco013873	STRE	AGGGG	1832	5	-	Arabidopsis thaliana
Aco013873	STRE	AGGGG	1862	5	-	Arabidopsis thaliana
Aco013873	ABRE	ACGTG	1359	5	+	Arabidopsis thaliana	cis-acting element involved in the abscisic acid responsiveness
Aco013873	ABRE	CACGTG	1683	6	-	Arabidopsis thaliana	cis-acting element involved in the abscisic acid responsiveness
Aco013873	ABRE	ACGTG	1684	5	+	Arabidopsis thaliana	cis-acting element involved in the abscisic acid responsiveness
Aco013873	Myb	CAACTG	205	6	-	Arabidopsis thaliana
Aco013873	Box 4	ATTAAT	438	6	+	Petroselinum crispum	part of a conserved DNA module involved in light responsiveness
Aco013873	Box 4	ATTAAT	606	6	+	Petroselinum crispum	part of a conserved DNA module involved in light responsiveness
Aco013873	Box 4	ATTAAT	617	6	+	Petroselinum crispum	part of a conserved DNA module involved in light responsiveness
Aco013873	Box 4	ATTAAT	1255	6	-	Petroselinum crispum	part of a conserved DNA module involved in light responsiveness
Aco013873	Box 4	ATTAAT	1398	6	-	Petroselinum crispum	part of a conserved DNA module involved in light responsiveness
Aco013873	CCGTCC motif	CCGTCC	1769	6	+	Nicotiana tabacum
Aco013873	as-1	TGACG	209	5	+	Arabidopsis thaliana
Aco013873	MRE	AACCTAA	937	7	-	Petroselinum crispum	MYB binding site involved in light responsiveness
Aco013873	Unnamed__4	CTCC	71	4	-	Petroselinum hortense
Aco013873	Unnamed__4	CTCC	256	4	-	Petroselinum hortense
Aco013873	Unnamed__4	CTCC	820	4	+	Petroselinum hortense
Aco013873	Unnamed__4	CTCC	1514	4	+	Petroselinum hortense
Aco013873	Unnamed__4	CTCC	1765	4	+	Petroselinum hortense
Aco013873	Unnamed__4	CTCC	1829	4	+	Petroselinum hortense
Aco013873	Unnamed__4	CTCC	1835	4	+	Petroselinum hortense
Aco013873	Unnamed__4	CTCC	1841	4	+	Petroselinum hortense
Aco013873	Unnamed__4	CTCC	1850	4	+	Petroselinum hortense
Aco013873	Unnamed__4	CTCC	1853	4	+	Petroselinum hortense
Aco013873	Unnamed__4	CTCC	1856	4	+	Petroselinum hortense
Aco013873	Unnamed__4	CTCC	1859	4	+	Petroselinum hortense
Aco013873	Unnamed__4	CTCC	1881	4	+	Petroselinum hortense
Aco013873	Unnamed__4	CTCC	1892	4	+	Petroselinum hortense
Aco013873	Unnamed__4	CTCC	1908	4	+	Petroselinum hortense
Aco013873	Unnamed__4	CTCC	1912	4	+	Petroselinum hortense
Aco013873	CCAAT-box	CAACGG	1727	6	+	Hordeum vulgare	MYBHv1 binding site
Aco013873	TATA-box	TATAAAT	503	7	-	Brassica juncea	core promoter element around -30 of transcription start
Aco013873	TATA-box	TATAAA	504	6	-	Helianthus annuus	core promoter element around -30 of transcription start
Aco013873	TATA-box	TATAA	505	5	-	Arabidopsis thaliana	core promoter element around -30 of transcription start
Aco013873	TATA-box	TATA	506	4	+	Arabidopsis thaliana	core promoter element around -30 of transcription start
Aco013873	TATA-box	TATACA	525	6	-	Helianthus annuus	core promoter element around -30 of transcription start
Aco013873	TATA-box	TATA	527	4	+	Arabidopsis thaliana	core promoter element around -30 of transcription start
Aco013873	TATA-box	ATATAA	621	6	+	Brassica oleracea	core promoter element around -30 of transcription start
Aco013873	TATA-box	TATA	622	4	+	Arabidopsis thaliana	core promoter element around -30 of transcription start
Aco013873	TATA-box	ATATAT	644	6	+	Brassica napus	core promoter element around -30 of transcription start
Aco013873	TATA-box	TATATA	645	6	+	Arabidopsis thaliana	core promoter element around -30 of transcription start
Aco013873	TATA-box	TATA	647	4	+	Arabidopsis thaliana	core promoter element around -30 of transcription start
Aco013873	TATA-box	ATATAT	691	6	+	Brassica napus	core promoter element around -30 of transcription start
Aco013873	TATA-box	TATATA	692	6	+	Arabidopsis thaliana	core promoter element around -30 of transcription start
Aco013873	TATA-box	ATATAA	693	6	+	Brassica oleracea	core promoter element around -30 of transcription start
Aco013873	TATA-box	TATA	694	4	+	Arabidopsis thaliana	core promoter element around -30 of transcription start
Aco013873	TATA-box	ATATAT	701	6	+	Brassica napus	core promoter element around -30 of transcription start
Aco013873	TATA-box	TATATA	702	6	+	Arabidopsis thaliana	core promoter element around -30 of transcription start
Aco013873	TATA-box	ATATAA	703	6	+	Brassica oleracea	core promoter element around -30 of transcription start
Aco013873	TATA-box	TATA	704	4	+	Arabidopsis thaliana	core promoter element around -30 of transcription start
Aco013873	TATA-box	taTATAAAtc	866	9	-	Arabidopsis thaliana	core promoter element around -30 of transcription start
Aco013873	TATA-box	TATAAAT	867	7	-	Brassica juncea	core promoter element around -30 of transcription start
Aco013873	TATA-box	TATAAA	868	6	-	Helianthus annuus	core promoter element around -30 of transcription start
Aco013873	TATA-box	TATATAA	869	7	-	Arabidopsis thaliana	core promoter element around -30 of transcription start
Aco013873	TATA-box	TATATA	870	6	+	Arabidopsis thaliana	core promoter element around -30 of transcription start
Aco013873	TATA-box	ATATAT	871	6	+	Brassica napus	core promoter element around -30 of transcription start
Aco013873	TATA-box	TATATA	872	6	+	Arabidopsis thaliana	core promoter element around -30 of transcription start
Aco013873	TATA-box	TATA	874	4	+	Arabidopsis thaliana	core promoter element around -30 of transcription start
Aco013873	TATA-box	TATA	879	4	+	Arabidopsis thaliana	core promoter element around -30 of transcription start
Aco013873	TATA-box	TATA	988	4	+	Arabidopsis thaliana	core promoter element around -30 of transcription start
Aco013873	TATA-box	ATATAA	1129	6	+	Brassica oleracea	core promoter element around -30 of transcription start
Aco013873	TATA-box	TATA	1130	4	-	Arabidopsis thaliana	core promoter element around -30 of transcription start
Aco013873	TATA-box	TATTTAAA	1143	8	-	Arabidopsis thaliana	core promoter element around -30 of transcription start
Aco013873	TATA-box	TATA	1177	4	-	Arabidopsis thaliana	core promoter element around -30 of transcription start
Aco013873	TATA-box	TATA	1207	4	-	Arabidopsis thaliana	core promoter element around -30 of transcription start
Aco013873	TATA-box	TAAAGATT	1260	8	+	Arabidopsis thaliana	core promoter element around -30 of transcription start
Aco013873	TATA-box	TACATAAA	1387	8	-	Oryza sativa	core promoter element around -30 of transcription start
Aco013873	TATA-box	TATATA	1495	6	-	Arabidopsis thaliana	core promoter element around -30 of transcription start
Aco013873	TATA-box	ATATAA	1496	6	+	Brassica oleracea	core promoter element around -30 of transcription start
Aco013873	TATA-box	TATA	1497	4	-	Arabidopsis thaliana	core promoter element around -30 of transcription start
Aco013873	TATA-box	ATATAT	1518	6	-	Brassica napus	core promoter element around -30 of transcription start
Aco013873	TATA-box	TATA	1519	4	-	Arabidopsis thaliana	core promoter element around -30 of transcription start
Aco013873	TATA-box	ATATAT	1699	6	-	Brassica napus	core promoter element around -30 of transcription start
Aco013873	TATA-box	TATA	1700	4	-	Arabidopsis thaliana	core promoter element around -30 of transcription start
Aco013873	TATA-box	TATATTTATATTT	1956	12	-	Avena sativa	core promoter element around -30 of transcription start
Aco013873	TATA-box	ATATAT	1958	6	-	Brassica napus	core promoter element around -30 of transcription start
Aco013873	TATA-box	TATATA	1959	6	-	Arabidopsis thaliana	core promoter element around -30 of transcription start
Aco013873	TATA-box	ATATAT	1960	6	-	Brassica napus	core promoter element around -30 of transcription start
Aco013873	TATA-box	TATATA	1961	6	-	Arabidopsis thaliana	core promoter element around -30 of transcription start
Aco013873	TATA-box	ATATAT	1962	6	-	Brassica napus	core promoter element around -30 of transcription start
Aco013873	TATA-box	TATATA	1963	6	-	Arabidopsis thaliana	core promoter element around -30 of transcription start
Aco013873	TATA-box	ATATAT	1964	6	-	Brassica napus	core promoter element around -30 of transcription start
Aco013873	TATA-box	TATATA	1965	6	-	Arabidopsis thaliana	core promoter element around -30 of transcription start
Aco013873	TATA-box	ATATAT	1966	6	-	Brassica napus	core promoter element around -30 of transcription start
Aco013873	TATA-box	TATATA	1967	6	-	Arabidopsis thaliana	core promoter element around -30 of transcription start
Aco013873	TATA-box	ATATAT	1968	6	-	Brassica napus	core promoter element around -30 of transcription start
Aco013873	TATA-box	TATATA	1969	6	-	Arabidopsis thaliana	core promoter element around -30 of transcription start
Aco013873	TATA-box	TATA	1971	4	-	Arabidopsis thaliana	core promoter element around -30 of transcription start
Aco013873	AT~TATA-box	TATATA	645	6	+	Arabidopsis thaliana
Aco013873	AT~TATA-box	TATATA	692	6	+	Arabidopsis thaliana
Aco013873	AT~TATA-box	TATATA	702	6	+	Arabidopsis thaliana
Aco013873	AT~TATA-box	TATATAAA	868	8	-	Arabidopsis thaliana
Aco013873	AT~TATA-box	TATATA	870	6	+	Arabidopsis thaliana
Aco013873	AT~TATA-box	TATATA	872	6	+	Arabidopsis thaliana
Aco013873	AT~TATA-box	TATATA	1495	6	-	Arabidopsis thaliana
Aco013873	AT~TATA-box	TATATA	1959	6	-	Arabidopsis thaliana
Aco013873	AT~TATA-box	TATATA	1961	6	-	Arabidopsis thaliana
Aco013873	AT~TATA-box	TATATA	1963	6	-	Arabidopsis thaliana
Aco013873	AT~TATA-box	TATATA	1965	6	-	Arabidopsis thaliana
Aco013873	AT~TATA-box	TATATA	1967	6	-	Arabidopsis thaliana
Aco013873	AT~TATA-box	TATATA	1969	6	-	Arabidopsis thaliana
Aco013873	CGTCA-motif	CGTCA	209	5	-	Hordeum vulgare	cis-acting regulatory element involved in the MeJA-responsiveness
Aco013873	ARE	AAACCA	346	6	-	Zea mays	cis-acting regulatory element essential for the anaerobic induction
Aco013873	G-Box	CACGTG	1683	6	-	Pisum sativum	cis-acting regulatory element involved in light responsiveness
Aco013873	MYC	CATTTG	295	6	-	Arabidopsis thaliana
Aco013873	MYC	CATTTG	589	6	-	Arabidopsis thaliana
Aco013873	I-box	gGATAAGGTG	1635	9	-	Zea mays	part of a light responsive element
Aco013873	ABRE4	CACGTA	1358	6	-	Zea mays
Aco013873	CCGTCC-box	CCGTCC	1769	6	+	Petroselinum hortense
Aco013873	chs-CMA1a	TTACTTAA	337	8	-	Daucus carota	part of a light responsive element
Aco013873	AAGAA-motif	GAAAGAA	1781	7	-	Avena sativa
Aco013873	TCCC-motif	TCTCCCT	1907	7	+	Spinacia oleracea	part of a light responsive element
Aco013873	LTR	CCGAAA	1309	6	-	Hordeum vulgare	cis-acting element involved in low-temperature responsiveness
Aco013873	GA-motif	ATAGATAA	730	8	-	Arabidopsis thaliana	part of a light responsive element
Aco013873	G-box	TACGTG	1358	6	+	Arabidopsis thaliana	cis-acting regulatory element involved in light responsiveness
Aco013873	G-box	ACACGTGT	1682	8	-	Brassica napus	cis-acting regulatory element involved in light responsiveness
Aco013873	G-box	CACGTG	1683	6	-	Arabidopsis thaliana	cis-acting regulatory element involved in light responsiveness
Aco013873	ABRE3a	TACGTG	1358	6	+	Zea mays
Aco013873	TCA	TCATCTTCAT	549	9	-	Pisum sativum
Aco013873	MYB recognition site	CCGTTG	1727	6	-	Arabidopsis thaliana
Aco015210	WRE3	CCACCT	1828	6	-	Pisum sativum
Aco015210	ERE	ATTTTAAA	124	8	+	Nicotiana glutinos
Aco015210	ERE	ATTTTAAA	126	8	-	Nicotiana glutinos
Aco015210	ERE	ATTTTAAA	1363	8	-	Nicotiana glutinos
Aco015210	TCT-motif	TCTTAC	1591	6	+	Arabidopsis thaliana	part of a light responsive element
Aco015210	W box	TTGACC	71	6	+	Arabidopsis thaliana
Aco015210	W box	TTGACC	438	6	-	Arabidopsis thaliana
Aco015210		motif_sequence	106	4	-	organism	short_function
Aco015210		motif_sequence	397	4	-	organism	short_function
Aco015210		motif_sequence	489	4	+	organism	short_function
Aco015210		motif_sequence	641	4	-	organism	short_function
Aco015210		motif_sequence	685	4	+	organism	short_function
Aco015210		motif_sequence	1050	4	-	organism	short_function
Aco015210		motif_sequence	1401	4	-	organism	short_function
Aco015210		motif_sequence	1415	4	-	organism	short_function
Aco015210		motif_sequence	1420	4	-	organism	short_function
Aco015210		motif_sequence	1672	4	-	organism	short_function
Aco015210		motif_sequence	1824	4	-	organism	short_function
Aco015210		motif_sequence	1920	4	+	organism	short_function
Aco015210		motif_sequence	1926	4	+	organism	short_function
Aco015210		motif_sequence	1955	4	+	organism	short_function
Aco015210	TC-rich repeats	ATTCTCTAAC	1227	9	-	Nicotiana tabacum	cis-acting element involved in defense and stress responsiveness
Aco015210	TC-rich repeats	ATTCTCTAAC	1604	9	+	Nicotiana tabacum	cis-acting element involved in defense and stress responsiveness
Aco015210	Unnamed__8	TCCACGTAGA	633	9	+	Zea mays
Aco015210	CAAT-box	CCAAT	61	5	-	Arabidopsis thaliana	common cis-acting element in promoter and enhancer regions
Aco015210	CAAT-box	CAAT	70	4	-	Nicotiana glutinosa
Aco015210	CAAT-box	CAAT	264	4	+	Nicotiana glutinosa
Aco015210	CAAT-box	CAAAT	299	5	+	Pisum sativum	common cis-acting element in promoter and enhancer regions
Aco015210	CAAT-box	CAAAT	308	5	-	Pisum sativum	common cis-acting element in promoter and enhancer regions
Aco015210	CAAT-box	CAAT	317	4	+	Nicotiana glutinosa
Aco015210	CAAT-box	CAAT	321	4	+	Nicotiana glutinosa
Aco015210	CAAT-box	CAAT	328	4	+	Nicotiana glutinosa
Aco015210	CAAT-box	CAAT	336	4	+	Nicotiana glutinosa
Aco015210	CAAT-box	CAAAT	370	5	+	Pisum sativum	common cis-acting element in promoter and enhancer regions
Aco015210	CAAT-box	CAAAT	608	5	-	Pisum sativum	common cis-acting element in promoter and enhancer regions
Aco015210	CAAT-box	CAAAT	701	5	+	Pisum sativum	common cis-acting element in promoter and enhancer regions
Aco015210	CAAT-box	CAAT	879	4	-	Nicotiana glutinosa
Aco015210	CAAT-box	CAAT	952	4	+	Nicotiana glutinosa
Aco015210	CAAT-box	CAAT	988	4	+	Nicotiana glutinosa
Aco015210	CAAT-box	CAAT	998	4	-	Nicotiana glutinosa
Aco015210	CAAT-box	CAAAT	1237	5	-	Pisum sativum	common cis-acting element in promoter and enhancer regions
Aco015210	CAAT-box	CAAT	1281	4	-	Nicotiana glutinosa
Aco015210	CAAT-box	CAAAT	1436	5	-	Pisum sativum	common cis-acting element in promoter and enhancer regions
Aco015210	CAAT-box	CAAT	1442	4	+	Nicotiana glutinosa
Aco015210	CAAT-box	CAAAT	1506	5	-	Pisum sativum	common cis-acting element in promoter and enhancer regions
Aco015210	CAAT-box	CAAAT	1541	5	+	Pisum sativum	common cis-acting element in promoter and enhancer regions
Aco015210	CAAT-box	CAAAT	1679	5	-	Pisum sativum	common cis-acting element in promoter and enhancer regions
Aco015210	CAAT-box	CAAAT	1805	5	-	Pisum sativum	common cis-acting element in promoter and enhancer regions
Aco015210	CAAT-box	CAAT	1890	4	-	Nicotiana glutinosa
Aco015210	3-AF1 binding site	TAAGAGAGGAA	1610	10	+	Solanum tuberosum	light responsive element
Aco015210	WUN-motif	AAATTTCTT	702	9	+	Nicotiana glutinosa
Aco015210	TGACG-motif	TGACG	423	5	+	Hordeum vulgare	cis-acting regulatory element involved in the MeJA-responsiveness
Aco015210	TGACG-motif	TGACG	526	5	-	Hordeum vulgare	cis-acting regulatory element involved in the MeJA-responsiveness
Aco015210	Unnamed__1	CGTGG	426	5	+	Zea mays
Aco015210	Unnamed__1	CGTGG	634	5	-	Zea mays
Aco015210	Unnamed__1	CGTGG	637	5	+	Zea mays
Aco015210	Unnamed__1	CGTGG	1853	5	+	Zea mays
Aco015210	Unnamed__1	CGTGG	1862	5	-	Zea mays
Aco015210	as-1	TGACG	423	5	+	Arabidopsis thaliana
Aco015210	as-1	TGACG	526	5	-	Arabidopsis thaliana
Aco015210	AE-box	AGAAACTT	1940	8	+	Arabidopsis thaliana	part of a module for light response
Aco015210	Box 4	ATTAAT	158	6	+	Petroselinum crispum	part of a conserved DNA module involved in light responsiveness
Aco015210	Box 4	ATTAAT	338	6	+	Petroselinum crispum	part of a conserved DNA module involved in light responsiveness
Aco015210	Pc-CMA2c	GCCCACGCA	1860	9	+	Pisum sativum	part of a light responsive element
Aco015210	TATA	TATAAAAT	884	8	+	Arabidopsis thaliana
Aco015210	ABRE	ACGTG	425	5	+	Arabidopsis thaliana	cis-acting element involved in the abscisic acid responsiveness
Aco015210	ABRE	CACGTG	635	6	+	Arabidopsis thaliana	cis-acting element involved in the abscisic acid responsiveness
Aco015210	ABRE	ACGTG	636	5	+	Arabidopsis thaliana	cis-acting element involved in the abscisic acid responsiveness
Aco015210	ABRE	ACGTG	758	5	-	Arabidopsis thaliana	cis-acting element involved in the abscisic acid responsiveness
Aco015210	ABRE	ACGTG	1002	5	-	Arabidopsis thaliana	cis-acting element involved in the abscisic acid responsiveness
Aco015210	Myb	TAACTG	897	6	-	Arabidopsis thaliana
Aco015210	Myb	TAACTG	1225	6	-	Arabidopsis thaliana
Aco015210	G-Box	CACGTG	635	6	+	Pisum sativum	cis-acting regulatory element involved in light responsiveness
Aco015210	G-Box	CACGTT	758	6	+	Pisum sativum	cis-acting regulatory element involved in light responsiveness
Aco015210	G-Box	CACGTT	1002	6	+	Pisum sativum	cis-acting regulatory element involved in light responsiveness
Aco015210	TGA-element	AACGAC	1776	6	-	Brassica oleracea	auxin-responsive element
Aco015210	ARE	AAACCA	1619	6	+	Zea mays	cis-acting regulatory element essential for the anaerobic induction
Aco015210	CGTCA-motif	CGTCA	423	5	-	Hordeum vulgare	cis-acting regulatory element involved in the MeJA-responsiveness
Aco015210	CGTCA-motif	CGTCA	526	5	+	Hordeum vulgare	cis-acting regulatory element involved in the MeJA-responsiveness
Aco015210	TATA-box	ATTATA	13	6	+	Brassica napus	core promoter element around -30 of transcription start
Aco015210	TATA-box	TATAA	14	5	-	Arabidopsis thaliana	core promoter element around -30 of transcription start
Aco015210	TATA-box	TATA	15	4	+	Arabidopsis thaliana	core promoter element around -30 of transcription start
Aco015210	TATA-box	TATTTAAA	54	8	+	Arabidopsis thaliana	core promoter element around -30 of transcription start
Aco015210	TATA-box	ATATAA	89	6	+	Brassica oleracea	core promoter element around -30 of transcription start
Aco015210	TATA-box	TATA	90	4	+	Arabidopsis thaliana	core promoter element around -30 of transcription start
Aco015210	TATA-box	TATAAAA	718	7	-	Pisum sativum	core promoter element around -30 of transcription start
Aco015210	TATA-box	TATAAA	719	6	-	Helianthus annuus	core promoter element around -30 of transcription start
Aco015210	TATA-box	TATAA	720	5	-	Arabidopsis thaliana	core promoter element around -30 of transcription start
Aco015210	TATA-box	TATA	721	4	+	Arabidopsis thaliana	core promoter element around -30 of transcription start
Aco015210	TATA-box	taTATAAAtc	786	9	-	Arabidopsis thaliana	core promoter element around -30 of transcription start
Aco015210	TATA-box	ATATAT	787	6	+	Brassica napus	core promoter element around -30 of transcription start
Aco015210	TATA-box	TATATA	788	6	+	Arabidopsis thaliana	core promoter element around -30 of transcription start
Aco015210	TATA-box	ATATAT	789	6	+	Brassica napus	core promoter element around -30 of transcription start
Aco015210	TATA-box	TATATA	790	6	+	Arabidopsis thaliana	core promoter element around -30 of transcription start
Aco015210	TATA-box	ATATAT	791	6	+	Brassica napus	core promoter element around -30 of transcription start
Aco015210	TATA-box	TATATA	792	6	+	Arabidopsis thaliana	core promoter element around -30 of transcription start
Aco015210	TATA-box	ATATAT	793	6	+	Brassica napus	core promoter element around -30 of transcription start
Aco015210	TATA-box	TATATA	794	6	+	Arabidopsis thaliana	core promoter element around -30 of transcription start
Aco015210	TATA-box	ATATAT	795	6	+	Brassica napus	core promoter element around -30 of transcription start
Aco015210	TATA-box	TATATA	796	6	+	Arabidopsis thaliana	core promoter element around -30 of transcription start
Aco015210	TATA-box	ATATAT	797	6	+	Brassica napus	core promoter element around -30 of transcription start
Aco015210	TATA-box	TATATA	798	6	+	Arabidopsis thaliana	core promoter element around -30 of transcription start
Aco015210	TATA-box	ATATAT	799	6	+	Brassica napus	core promoter element around -30 of transcription start
Aco015210	TATA-box	TATATA	800	6	+	Arabidopsis thaliana	core promoter element around -30 of transcription start
Aco015210	TATA-box	ATATAT	801	6	+	Brassica napus	core promoter element around -30 of transcription start
Aco015210	TATA-box	TATATA	802	6	+	Arabidopsis thaliana	core promoter element around -30 of transcription start
Aco015210	TATA-box	ATATAT	803	6	+	Brassica napus	core promoter element around -30 of transcription start
Aco015210	TATA-box	TATATA	804	6	+	Arabidopsis thaliana	core promoter element around -30 of transcription start
Aco015210	TATA-box	ATATAT	805	6	+	Brassica napus	core promoter element around -30 of transcription start
Aco015210	TATA-box	TATATA	806	6	+	Arabidopsis thaliana	core promoter element around -30 of transcription start
Aco015210	TATA-box	ATATAT	807	6	+	Brassica napus	core promoter element around -30 of transcription start
Aco015210	TATA-box	TATATA	808	6	+	Arabidopsis thaliana	core promoter element around -30 of transcription start
Aco015210	TATA-box	ATATAT	809	6	+	Brassica napus	core promoter element around -30 of transcription start
Aco015210	TATA-box	TATATA	810	6	+	Arabidopsis thaliana	core promoter element around -30 of transcription start
Aco015210	TATA-box	ATATAT	811	6	+	Brassica napus	core promoter element around -30 of transcription start
Aco015210	TATA-box	TATATA	812	6	+	Arabidopsis thaliana	core promoter element around -30 of transcription start
Aco015210	TATA-box	ATATAT	813	6	+	Brassica napus	core promoter element around -30 of transcription start
Aco015210	TATA-box	TATATA	814	6	+	Arabidopsis thaliana	core promoter element around -30 of transcription start
Aco015210	TATA-box	ATATAT	815	6	+	Brassica napus	core promoter element around -30 of transcription start
Aco015210	TATA-box	TATATA	816	6	+	Arabidopsis thaliana	core promoter element around -30 of transcription start
Aco015210	TATA-box	ATATAT	817	6	+	Brassica napus	core promoter element around -30 of transcription start
Aco015210	TATA-box	TATATA	818	6	+	Arabidopsis thaliana	core promoter element around -30 of transcription start
Aco015210	TATA-box	ATATAT	819	6	+	Brassica napus	core promoter element around -30 of transcription start
Aco015210	TATA-box	TATATA	820	6	+	Arabidopsis thaliana	core promoter element around -30 of transcription start
Aco015210	TATA-box	ATATAT	821	6	+	Brassica napus	core promoter element around -30 of transcription start
Aco015210	TATA-box	TATATA	822	6	+	Arabidopsis thaliana	core promoter element around -30 of transcription start
Aco015210	TATA-box	ATATAT	823	6	+	Brassica napus	core promoter element around -30 of transcription start
Aco015210	TATA-box	TATATA	824	6	+	Arabidopsis thaliana	core promoter element around -30 of transcription start
Aco015210	TATA-box	ATATAT	825	6	+	Brassica napus	core promoter element around -30 of transcription start
Aco015210	TATA-box	TATATA	826	6	+	Arabidopsis thaliana	core promoter element around -30 of transcription start
Aco015210	TATA-box	ATATAT	827	6	+	Brassica napus	core promoter element around -30 of transcription start
Aco015210	TATA-box	TATATA	828	6	+	Arabidopsis thaliana	core promoter element around -30 of transcription start
Aco015210	TATA-box	ATATAT	829	6	+	Brassica napus	core promoter element around -30 of transcription start
Aco015210	TATA-box	TATATA	830	6	+	Arabidopsis thaliana	core promoter element around -30 of transcription start
Aco015210	TATA-box	ATATAT	831	6	+	Brassica napus	core promoter element around -30 of transcription start
Aco015210	TATA-box	TATATA	832	6	+	Arabidopsis thaliana	core promoter element around -30 of transcription start
Aco015210	TATA-box	ATATAT	833	6	+	Brassica napus	core promoter element around -30 of transcription start
Aco015210	TATA-box	TATATTTATATTT	834	12	+	Avena sativa	core promoter element around -30 of transcription start
Aco015210	TATA-box	ATATAT	835	6	+	Brassica napus	core promoter element around -30 of transcription start
Aco015210	TATA-box	TATATA	836	6	+	Arabidopsis thaliana	core promoter element around -30 of transcription start
Aco015210	TATA-box	ATATAT	837	6	+	Brassica napus	core promoter element around -30 of transcription start
Aco015210	TATA-box	TATATA	838	6	+	Arabidopsis thaliana	core promoter element around -30 of transcription start
Aco015210	TATA-box	ATATAT	839	6	+	Brassica napus	core promoter element around -30 of transcription start
Aco015210	TATA-box	TATA	840	4	+	Arabidopsis thaliana	core promoter element around -30 of transcription start
Aco015210	TATA-box	TATAA	883	5	-	Arabidopsis thaliana	core promoter element around -30 of transcription start
Aco015210	TATA-box	TATA	884	4	+	Arabidopsis thaliana	core promoter element around -30 of transcription start
Aco015210	TATA-box	taTATAAAtc	909	9	-	Arabidopsis thaliana	core promoter element around -30 of transcription start
Aco015210	TATA-box	TATAAAT	910	7	-	Brassica juncea	core promoter element around -30 of transcription start
Aco015210	TATA-box	TATAAA	911	6	-	Helianthus annuus	core promoter element around -30 of transcription start
Aco015210	TATA-box	TATATAA	912	7	-	Arabidopsis thaliana	core promoter element around -30 of transcription start
Aco015210	TATA-box	TATATA	913	6	+	Arabidopsis thaliana	core promoter element around -30 of transcription start
Aco015210	TATA-box	ATATAT	914	6	+	Brassica napus	core promoter element around -30 of transcription start
Aco015210	TATA-box	TATATA	915	6	+	Arabidopsis thaliana	core promoter element around -30 of transcription start
Aco015210	TATA-box	TATA	917	4	+	Arabidopsis thaliana	core promoter element around -30 of transcription start
Aco015210	TATA-box	TATATA	946	6	+	Arabidopsis thaliana	core promoter element around -30 of transcription start
Aco015210	TATA-box	TATA	948	4	+	Arabidopsis thaliana	core promoter element around -30 of transcription start
Aco015210	TATA-box	TACAAAA	975	7	+	Oryza sativa	core promoter element around -30 of transcription start
Aco015210	TATA-box	TATA	1017	4	-	Arabidopsis thaliana	core promoter element around -30 of transcription start
Aco015210	TATA-box	TATAAAA	1033	7	-	Pisum sativum	core promoter element around -30 of transcription start
Aco015210	TATA-box	TATAAA	1034	6	-	Helianthus annuus	core promoter element around -30 of transcription start
Aco015210	TATA-box	TATAA	1035	5	-	Arabidopsis thaliana	core promoter element around -30 of transcription start
Aco015210	TATA-box	TATA	1036	4	-	Arabidopsis thaliana	core promoter element around -30 of transcription start
Aco015210	TATA-box	TATA	1497	4	-	Arabidopsis thaliana	core promoter element around -30 of transcription start
Aco015210	TATA-box	ATTATA	1520	6	+	Brassica napus	core promoter element around -30 of transcription start
Aco015210	TATA-box	TATAA	1521	5	-	Arabidopsis thaliana	core promoter element around -30 of transcription start
Aco015210	TATA-box	TATA	1522	4	-	Arabidopsis thaliana	core promoter element around -30 of transcription start
Aco015210	TATA-box	TACAAAA	1552	7	-	Oryza sativa	core promoter element around -30 of transcription start
Aco015210	TATA-box	TATACA	1601	6	-	Helianthus annuus	core promoter element around -30 of transcription start
Aco015210	TATA-box	TATA	1603	4	-	Arabidopsis thaliana	core promoter element around -30 of transcription start
Aco015210	AT~TATA-box	TATATA	788	6	+	Arabidopsis thaliana
Aco015210	AT~TATA-box	TATATA	790	6	+	Arabidopsis thaliana
Aco015210	AT~TATA-box	TATATA	792	6	+	Arabidopsis thaliana
Aco015210	AT~TATA-box	TATATA	794	6	+	Arabidopsis thaliana
Aco015210	AT~TATA-box	TATATA	796	6	+	Arabidopsis thaliana
Aco015210	AT~TATA-box	TATATA	798	6	+	Arabidopsis thaliana
Aco015210	AT~TATA-box	TATATA	800	6	+	Arabidopsis thaliana
Aco015210	AT~TATA-box	TATATA	802	6	+	Arabidopsis thaliana
Aco015210	AT~TATA-box	TATATA	804	6	+	Arabidopsis thaliana
Aco015210	AT~TATA-box	TATATA	806	6	+	Arabidopsis thaliana
Aco015210	AT~TATA-box	TATATA	808	6	+	Arabidopsis thaliana
Aco015210	AT~TATA-box	TATATA	810	6	+	Arabidopsis thaliana
Aco015210	AT~TATA-box	TATATA	812	6	+	Arabidopsis thaliana
Aco015210	AT~TATA-box	TATATA	814	6	+	Arabidopsis thaliana
Aco015210	AT~TATA-box	TATATA	816	6	+	Arabidopsis thaliana
Aco015210	AT~TATA-box	TATATA	818	6	+	Arabidopsis thaliana
Aco015210	AT~TATA-box	TATATA	820	6	+	Arabidopsis thaliana
Aco015210	AT~TATA-box	TATATA	822	6	+	Arabidopsis thaliana
Aco015210	AT~TATA-box	TATATA	824	6	+	Arabidopsis thaliana
Aco015210	AT~TATA-box	TATATA	826	6	+	Arabidopsis thaliana
Aco015210	AT~TATA-box	TATATA	828	6	+	Arabidopsis thaliana
Aco015210	AT~TATA-box	TATATA	830	6	+	Arabidopsis thaliana
Aco015210	AT~TATA-box	TATATA	832	6	+	Arabidopsis thaliana
Aco015210	AT~TATA-box	TATATA	834	6	+	Arabidopsis thaliana
Aco015210	AT~TATA-box	TATATA	836	6	+	Arabidopsis thaliana
Aco015210	AT~TATA-box	TATATA	838	6	+	Arabidopsis thaliana
Aco015210	AT~TATA-box	TATATAAA	911	8	-	Arabidopsis thaliana
Aco015210	AT~TATA-box	TATATA	913	6	+	Arabidopsis thaliana
Aco015210	AT~TATA-box	TATATA	915	6	+	Arabidopsis thaliana
Aco015210	AT~TATA-box	TATATA	946	6	+	Arabidopsis thaliana
Aco015210	Unnamed__4	CTCC	456	4	-	Petroselinum hortense
Aco015210	Unnamed__4	CTCC	696	4	+	Petroselinum hortense
Aco015210	Unnamed__4	CTCC	1070	4	-	Petroselinum hortense
Aco015210	Unnamed__4	CTCC	1209	4	-	Petroselinum hortense
Aco015210	Unnamed__4	CTCC	1401	4	-	Petroselinum hortense
Aco015210	Unnamed__4	CTCC	1420	4	-	Petroselinum hortense
Aco015210	Unnamed__4	CTCC	1644	4	-	Petroselinum hortense
Aco015210	Unnamed__4	CTCC	1928	4	+	Petroselinum hortense
Aco015210	Unnamed__4	CTCC	1957	4	+	Petroselinum hortense
Aco015210	Unnamed__4	CTCC	1983	4	-	Petroselinum hortense
Aco015210	Unnamed__4	CTCC	1988	4	-	Petroselinum hortense
Aco015210	Unnamed__12	TCCACGTAGA	633	9	+	Zea mays
Aco015210	CTAG-motif	ACTAGCAGAA	1149	9	+	Avena sativa
Aco015210	TCCC-motif	TCTCCCT	1927	7	+	Spinacia oleracea	part of a light responsive element
Aco015210	AAGAA-motif	GAAAGAA	102	7	+	Avena sativa
Aco015210	O2-site	GATGATGTGG	421	9	+	Zea mays	cis-acting regulatory element involved in zein metabolism regulation
Aco015210	O2-site	GATGATGTGG	960	9	+	Zea mays	cis-acting regulatory element involved in zein metabolism regulation
Aco015210	Unnamed__14	TCCACGTAGA	633	9	+	Zea mays
Aco015210	Unnamed__10	TCCACGTAGA	633	9	+	Zea mays
Aco015210	ABRE2	CCACGTGG	634	8	+	Zea mays
Aco015210	MYC	CATTTG	370	6	-	Arabidopsis thaliana
Aco015210	AT-rich element	ATAGAAATCAA	1533	10	+	Glycine max	binding site of AT-rich DNA binding protein (ATBP-1)
Aco015210	G-box	CACGTC	424	6	-	Zea mays	cis-acting regulatory element involved in light responsiveness
Aco015210	G-box	GCCACGTGGA	633	9	+	Arabidopsis thaliana	cis-acting regulatory element involved in light responsiveness
Aco015210	G-box	CACGTG	635	6	+	Arabidopsis thaliana	cis-acting regulatory element involved in light responsiveness
Aco015210	LTR	CCGAAA	777	6	-	Hordeum vulgare	cis-acting element involved in low-temperature responsiveness
Aco016114	TATA	TATAAAAT	989	8	+	Arabidopsis thaliana
Aco016114	ABRE	CGCACGTGTC	392	9	-	Hordeum vulgare	cis-acting element involved in the abscisic acid responsiveness
Aco016114	ABRE	CACGTG	394	6	+	Arabidopsis thaliana	cis-acting element involved in the abscisic acid responsiveness
Aco016114	ABRE	ACGTG	395	5	+	Arabidopsis thaliana	cis-acting element involved in the abscisic acid responsiveness
Aco016114	ABRE	ACGTG	1461	5	-	Arabidopsis thaliana	cis-acting element involved in the abscisic acid responsiveness
Aco016114	ABRE	GCCGCGTGGC	1753	9	+	Oryza sativa	cis-acting element involved in the abscisic acid responsiveness
Aco016114	ABRE	ACGTG	1942	5	-	Arabidopsis thaliana	cis-acting element involved in the abscisic acid responsiveness
Aco016114	CCGTCC motif	CCGTCC	1611	6	-	Nicotiana tabacum
Aco016114	Box 4	ATTAAT	1075	6	-	Petroselinum crispum	part of a conserved DNA module involved in light responsiveness
Aco016114	as-1	TGACG	1250	5	+	Arabidopsis thaliana
Aco016114	as-1	TGACG	1617	5	-	Arabidopsis thaliana
Aco016114	as-1	TGACG	1726	5	+	Arabidopsis thaliana
Aco016114	DRE core	GCCGAC	1945	6	-	Arabidopsis thaliana
Aco016114	TGACG-motif	TGACG	1250	5	+	Hordeum vulgare	cis-acting regulatory element involved in the MeJA-responsiveness
Aco016114	TGACG-motif	TGACG	1617	5	-	Hordeum vulgare	cis-acting regulatory element involved in the MeJA-responsiveness
Aco016114	TGACG-motif	TGACG	1726	5	+	Hordeum vulgare	cis-acting regulatory element involved in the MeJA-responsiveness
Aco016114	Unnamed__1	CGTGG	616	5	+	Zea mays
Aco016114	Unnamed__1	GCCACGTGGC	1753	9	-	Petunia sp.
Aco016114	Unnamed__1	CGTGG	1757	5	+	Zea mays
Aco016114	Unnamed__1	CGTGG	1860	5	-	Zea mays
Aco016114	Unnamed__1	CGTGG	1941	5	-	Zea mays
Aco016114	LAMP-element	CTTTATCA	102	8	+	Pisum sativum	part of a light responsive element
Aco016114	WUN-motif	AAATTACTA	1413	9	+	Nicotiana glutinosa
Aco016114	STRE	AGGGG	196	5	+	Arabidopsis thaliana
Aco016114	STRE	AGGGG	863	5	+	Arabidopsis thaliana
Aco016114	STRE	AGGGG	893	5	+	Arabidopsis thaliana
Aco016114	STRE	AGGGG	1084	5	-	Arabidopsis thaliana
Aco016114	CAAT-box	CAAAT	70	5	+	Pisum sativum	common cis-acting element in promoter and enhancer regions
Aco016114	CAAT-box	CAAAT	125	5	+	Pisum sativum	common cis-acting element in promoter and enhancer regions
Aco016114	CAAT-box	CAAAT	173	5	+	Pisum sativum	common cis-acting element in promoter and enhancer regions
Aco016114	CAAT-box	CAAT	176	4	-	Nicotiana glutinosa
Aco016114	CAAT-box	CAAAT	249	5	+	Pisum sativum	common cis-acting element in promoter and enhancer regions
Aco016114	CAAT-box	CAAT	259	4	+	Nicotiana glutinosa
Aco016114	CAAT-box	CAAT	283	4	+	Nicotiana glutinosa
Aco016114	CAAT-box	CAAT	343	4	+	Nicotiana glutinosa
Aco016114	CAAT-box	CAAT	637	4	-	Nicotiana glutinosa
Aco016114	CAAT-box	CAAT	664	4	+	Nicotiana glutinosa
Aco016114	CAAT-box	CAAAT	666	5	-	Pisum sativum	common cis-acting element in promoter and enhancer regions
Aco016114	CAAT-box	CAAT	705	4	+	Nicotiana glutinosa
Aco016114	CAAT-box	CAAT	732	4	+	Nicotiana glutinosa
Aco016114	CAAT-box	CAAAT	770	5	-	Pisum sativum	common cis-acting element in promoter and enhancer regions
Aco016114	CAAT-box	CAAAT	870	5	+	Pisum sativum	common cis-acting element in promoter and enhancer regions
Aco016114	CAAT-box	CAAT	873	4	-	Nicotiana glutinosa
Aco016114	CAAT-box	CAAAT	1029	5	+	Pisum sativum	common cis-acting element in promoter and enhancer regions
Aco016114	CAAT-box	CAAT	1065	4	+	Nicotiana glutinosa
Aco016114	CAAT-box	CCAAT	1072	5	+	Arabidopsis thaliana	common cis-acting element in promoter and enhancer regions
Aco016114	CAAT-box	CAAT	1073	4	+	Nicotiana glutinosa
Aco016114	CAAT-box	CAAAT	1146	5	-	Pisum sativum	common cis-acting element in promoter and enhancer regions
Aco016114	CAAT-box	CAAT	1187	4	+	Nicotiana glutinosa
Aco016114	CAAT-box	CAAAT	1247	5	-	Pisum sativum	common cis-acting element in promoter and enhancer regions
Aco016114	CAAT-box	CAAAT	1379	5	+	Pisum sativum	common cis-acting element in promoter and enhancer regions
Aco016114	CAAT-box	CCAAT	1390	5	+	Arabidopsis thaliana	common cis-acting element in promoter and enhancer regions
Aco016114	CAAT-box	CAAT	1391	4	+	Nicotiana glutinosa
Aco016114	CAAT-box	CAAT	1483	4	-	Nicotiana glutinosa
Aco016114	CAAT-box	CAAAT	1548	5	+	Pisum sativum	common cis-acting element in promoter and enhancer regions
Aco016114	CAAT-box	CCAAT	1779	5	+	Arabidopsis thaliana	common cis-acting element in promoter and enhancer regions
Aco016114	CAAT-box	CAAT	1780	4	+	Nicotiana glutinosa
Aco016114	CAAT-box	CAAT	1854	4	-	Nicotiana glutinosa
Aco016114	CAAT-box	CCAAT	1990	5	+	Arabidopsis thaliana	common cis-acting element in promoter and enhancer regions
Aco016114	CAAT-box	CAAT	1991	4	+	Nicotiana glutinosa
Aco016114	A-box	CCGTCC	1611	6	-	Petroselinum crispum	cis-acting regulatory element
Aco016114	MBSI	TTTTTACGGTTA	1403	11	-	Petunia hybrida	MYB binding site involved in flavonoid biosynthetic genes regulation
Aco016114		motif_sequence	295	4	+	organism	short_function
Aco016114		motif_sequence	404	4	-	organism	short_function
Aco016114		motif_sequence	419	4	+	organism	short_function
Aco016114		motif_sequence	519	4	-	organism	short_function
Aco016114		motif_sequence	1486	4	-	organism	short_function
Aco016114		motif_sequence	1674	4	+	organism	short_function
Aco016114		motif_sequence	1698	4	+	organism	short_function
Aco016114		motif_sequence	1792	4	+	organism	short_function
Aco016114		motif_sequence	1798	4	+	organism	short_function
Aco016114		motif_sequence	1909	4	+	organism	short_function
Aco016114		motif_sequence	1916	4	+	organism	short_function
Aco016114		motif_sequence	1954	4	+	organism	short_function
Aco016114	WRE3	CCACCT	299	6	+	Pisum sativum
Aco016114	Sp1	GGGCGG	1741	6	-	Oryza sativa	light responsive element
Aco016114	ERE	ATTTTAAA	184	8	+	Nicotiana glutinos
Aco016114	ERE	ATTTTAAA	481	8	+	Nicotiana glutinos
Aco016114	ERE	ATTTTAAA	652	8	-	Nicotiana glutinos
Aco016114	MYB	CAACAG	433	6	-	Arabidopsis thaliana
Aco016114	MYB	CAACCA	1093	6	+	Arabidopsis thaliana
Aco016114	MYB	CAACCA	1387	6	+	Arabidopsis thaliana
Aco016114	GT1-motif	GGTTAA	369	6	+	Arabidopsis thaliana	light responsive element
Aco016114	GT1-motif	GGTTAAT	1079	7	-	Avena sativa	light responsive element
Aco016114	GT1-motif	GGTTAA	1080	6	-	Arabidopsis thaliana	light responsive element
Aco016114	GT1-motif	GGTTAA	1402	6	-	Arabidopsis thaliana	light responsive element
Aco016114	GT1-motif	GGTTAA	1427	6	-	Arabidopsis thaliana	light responsive element
Aco016114	GT1-motif	GGTTAAT	1448	7	+	Avena sativa	light responsive element
Aco016114	LTR	CCGAAA	839	6	+	Hordeum vulgare	cis-acting element involved in low-temperature responsiveness
Aco016114	Myb-binding site	CAACAG	433	6	-	Nicotiana tabacum
Aco016114	G-box	CACGTG	394	6	+	Arabidopsis thaliana	cis-acting regulatory element involved in light responsiveness
Aco016114	G-box	CACGTC	1942	6	+	Zea mays	cis-acting regulatory element involved in light responsiveness
Aco016114	CAT-box	GCCACT	1058	6	+	Arabidopsis thaliana	cis-acting regulatory element related to meristem expression
Aco016114	CAT-box	GCCACT	1846	6	+	Arabidopsis thaliana	cis-acting regulatory element related to meristem expression
Aco016114	CAT-box	GCCACT	1904	6	-	Arabidopsis thaliana	cis-acting regulatory element related to meristem expression
Aco016114	GC-motif	CGCCGCGCA	1803	9	+	Oryza sativa	?
Aco016114	I-box	gGATAAGGTG	300	9	-	Zea mays	part of a light responsive element
Aco016114	MYC	CATGTG	405	6	-	Arabidopsis thaliana
Aco016114	MYC	CATGTG	531	6	-	Arabidopsis thaliana
Aco016114	MYC	CATGTG	544	6	-	Arabidopsis thaliana
Aco016114	MYC	CATGTG	645	6	+	Arabidopsis thaliana
Aco016114	CCGTCC-box	CCGTCC	1611	6	-	Petroselinum hortense
Aco016114	TCCC-motif	TCTCCCT	1917	7	+	Spinacia oleracea	part of a light responsive element
Aco016114	TATA-box	TATATA	33	6	+	Arabidopsis thaliana	core promoter element around -30 of transcription start
Aco016114	TATA-box	TATA	35	4	+	Arabidopsis thaliana	core promoter element around -30 of transcription start
Aco016114	TATA-box	TACAAAA	37	7	+	Oryza sativa	core promoter element around -30 of transcription start
Aco016114	TATA-box	TATA	81	4	+	Arabidopsis thaliana	core promoter element around -30 of transcription start
Aco016114	TATA-box	ATTATA	136	6	+	Brassica napus	core promoter element around -30 of transcription start
Aco016114	TATA-box	TATAA	137	5	-	Arabidopsis thaliana	core promoter element around -30 of transcription start
Aco016114	TATA-box	TATA	138	4	+	Arabidopsis thaliana	core promoter element around -30 of transcription start
Aco016114	TATA-box	ATTATA	358	6	+	Brassica napus	core promoter element around -30 of transcription start
Aco016114	TATA-box	TATAA	359	5	-	Arabidopsis thaliana	core promoter element around -30 of transcription start
Aco016114	TATA-box	TATA	360	4	+	Arabidopsis thaliana	core promoter element around -30 of transcription start
Aco016114	TATA-box	ccTATAAAaa	445	9	+	Arabidopsis thaliana	core promoter element around -30 of transcription start
Aco016114	TATA-box	ATATAA	446	6	+	Brassica oleracea	core promoter element around -30 of transcription start
Aco016114	TATA-box	TATA	447	4	+	Arabidopsis thaliana	core promoter element around -30 of transcription start
Aco016114	TATA-box	TACAAAA	801	7	-	Oryza sativa	core promoter element around -30 of transcription start
Aco016114	TATA-box	TATACA	804	6	-	Helianthus annuus	core promoter element around -30 of transcription start
Aco016114	TATA-box	TATATA	806	6	+	Arabidopsis thaliana	core promoter element around -30 of transcription start
Aco016114	TATA-box	ATATAA	807	6	+	Brassica oleracea	core promoter element around -30 of transcription start
Aco016114	TATA-box	TATA	808	4	+	Arabidopsis thaliana	core promoter element around -30 of transcription start
Aco016114	TATA-box	ATATAA	976	6	+	Brassica oleracea	core promoter element around -30 of transcription start
Aco016114	TATA-box	TATA	977	4	+	Arabidopsis thaliana	core promoter element around -30 of transcription start
Aco016114	TATA-box	ATTATA	987	6	+	Brassica napus	core promoter element around -30 of transcription start
Aco016114	TATA-box	TATAA	988	5	-	Arabidopsis thaliana	core promoter element around -30 of transcription start
Aco016114	TATA-box	TATA	989	4	+	Arabidopsis thaliana	core promoter element around -30 of transcription start
Aco016114	TATA-box	TACAAAA	996	7	+	Oryza sativa	core promoter element around -30 of transcription start
Aco016114	TATA-box	ATTATA	1038	6	+	Brassica napus	core promoter element around -30 of transcription start
Aco016114	TATA-box	TATAA	1039	5	-	Arabidopsis thaliana	core promoter element around -30 of transcription start
Aco016114	TATA-box	TATA	1040	4	-	Arabidopsis thaliana	core promoter element around -30 of transcription start
Aco016114	TATA-box	ATATAA	1201	6	+	Brassica oleracea	core promoter element around -30 of transcription start
Aco016114	TATA-box	TATA	1202	4	-	Arabidopsis thaliana	core promoter element around -30 of transcription start
Aco016114	TATA-box	ATATAT	1211	6	-	Brassica napus	core promoter element around -30 of transcription start
Aco016114	TATA-box	TATA	1212	4	-	Arabidopsis thaliana	core promoter element around -30 of transcription start
Aco016114	TATA-box	ATTATA	1227	6	+	Brassica napus	core promoter element around -30 of transcription start
Aco016114	TATA-box	TATAA	1228	5	-	Arabidopsis thaliana	core promoter element around -30 of transcription start
Aco016114	TATA-box	TATA	1229	4	-	Arabidopsis thaliana	core promoter element around -30 of transcription start
Aco016114	TATA-box	TACAAAA	1257	7	+	Oryza sativa	core promoter element around -30 of transcription start
Aco016114	TATA-box	TATATTTATATTT	1262	12	-	Avena sativa	core promoter element around -30 of transcription start
Aco016114	TATA-box	ATTATA	1263	6	+	Brassica napus	core promoter element around -30 of transcription start
Aco016114	TATA-box	TATAA	1264	5	-	Arabidopsis thaliana	core promoter element around -30 of transcription start
Aco016114	TATA-box	TATA	1265	4	-	Arabidopsis thaliana	core promoter element around -30 of transcription start
Aco016114	TATA-box	ATATAA	1270	6	+	Brassica oleracea	core promoter element around -30 of transcription start
Aco016114	TATA-box	TATA	1271	4	-	Arabidopsis thaliana	core promoter element around -30 of transcription start
Aco016114	TATA-box	TATA	1367	4	-	Arabidopsis thaliana	core promoter element around -30 of transcription start
Aco016114	TATA-box	ATATAT	1490	6	-	Brassica napus	core promoter element around -30 of transcription start
Aco016114	TATA-box	TATA	1491	4	-	Arabidopsis thaliana	core promoter element around -30 of transcription start
Aco016114	TATA-box	TACAAAA	1528	7	+	Oryza sativa	core promoter element around -30 of transcription start
Aco016114	AT~TATA-box	TATATA	33	6	+	Arabidopsis thaliana
Aco016114	AT~TATA-box	TATATA	806	6	+	Arabidopsis thaliana
Aco016114	Unnamed__4	CTCC	167	4	-	Petroselinum hortense
Aco016114	Unnamed__4	CTCC	297	4	+	Petroselinum hortense
Aco016114	Unnamed__4	CTCC	612	4	+	Petroselinum hortense
Aco016114	Unnamed__4	CTCC	1114	4	+	Petroselinum hortense
Aco016114	Unnamed__4	CTCC	1606	4	-	Petroselinum hortense
Aco016114	Unnamed__4	CTCC	1632	4	-	Petroselinum hortense
Aco016114	Unnamed__4	CTCC	1660	4	-	Petroselinum hortense
Aco016114	Unnamed__4	CTCC	1700	4	+	Petroselinum hortense
Aco016114	Unnamed__4	CTCC	1777	4	+	Petroselinum hortense
Aco016114	Unnamed__4	CTCC	1800	4	+	Petroselinum hortense
Aco016114	Unnamed__4	CTCC	1918	4	+	Petroselinum hortense
Aco016114	Unnamed__4	CTCC	1956	4	+	Petroselinum hortense
Aco016114	Unnamed__4	CTCC	1959	4	+	Petroselinum hortense
Aco016114	Unnamed__4	CTCC	1962	4	+	Petroselinum hortense
Aco016114	ACE	CTAACGTATT	1538	9	+	Petroselinum crispum	cis-acting element involved in light responsiveness
Aco016114	ACE	GCGACGTACC	1663	10	-	Petroselinum crispum	cis-acting element involved in light responsiveness
Aco016114	TGA-element	AACGAC	1621	6	+	Brassica oleracea	auxin-responsive element
Aco016114	CGTCA-motif	CGTCA	1250	5	-	Hordeum vulgare	cis-acting regulatory element involved in the MeJA-responsiveness
Aco016114	CGTCA-motif	CGTCA	1617	5	+	Hordeum vulgare	cis-acting regulatory element involved in the MeJA-responsiveness
Aco016114	CGTCA-motif	CGTCA	1726	5	-	Hordeum vulgare	cis-acting regulatory element involved in the MeJA-responsiveness
Aco016114	ARE	AAACCA	189	6	+	Zea mays	cis-acting regulatory element essential for the anaerobic induction
Aco016114	ARE	AAACCA	219	6	+	Zea mays	cis-acting regulatory element essential for the anaerobic induction
Aco016114	ARE	AAACCA	453	6	+	Zea mays	cis-acting regulatory element essential for the anaerobic induction
Aco016114	ARE	AAACCA	618	6	-	Zea mays	cis-acting regulatory element essential for the anaerobic induction
Aco016114	ARE	AAACCA	649	6	-	Zea mays	cis-acting regulatory element essential for the anaerobic induction
Aco016114	ARE	AAACCA	679	6	-	Zea mays	cis-acting regulatory element essential for the anaerobic induction
Aco016114	ARE	AAACCA	886	6	+	Zea mays	cis-acting regulatory element essential for the anaerobic induction
Aco016114	ARE	AAACCA	917	6	+	Zea mays	cis-acting regulatory element essential for the anaerobic induction
Aco016114	G-Box	CACGTG	394	6	+	Pisum sativum	cis-acting regulatory element involved in light responsiveness
Aco016114	G-Box	CACGTT	1461	6	+	Pisum sativum	cis-acting regulatory element involved in light responsiveness
Aco016689	ABRE	ACGTG	135	5	-	Arabidopsis thaliana	cis-acting element involved in the abscisic acid responsiveness
Aco016689	ABRE	GCAACGTGTC	510	9	-	Hordeum vulgare	cis-acting element involved in the abscisic acid responsiveness
Aco016689	ABRE	GACACGTGGC	911	9	-	Triticum aestivum	cis-acting element involved in the abscisic acid responsiveness
Aco016689	ABRE	CACGTG	913	6	+	Arabidopsis thaliana	cis-acting element involved in the abscisic acid responsiveness
Aco016689	ABRE	ACGTG	914	5	+	Arabidopsis thaliana	cis-acting element involved in the abscisic acid responsiveness
Aco016689	ABRE	ACGTG	1801	5	+	Arabidopsis thaliana	cis-acting element involved in the abscisic acid responsiveness
Aco016689	ABRE	ACGTG	1829	5	+	Arabidopsis thaliana	cis-acting element involved in the abscisic acid responsiveness
Aco016689	Myb	TAACTG	1324	6	-	Arabidopsis thaliana
Aco016689	AE-box	AGAAACAA	552	8	-	Arabidopsis thaliana	part of a module for light response
Aco016689	as-1	TGACG	768	5	-	Arabidopsis thaliana
Aco016689	Box 4	ATTAAT	459	6	+	Petroselinum crispum	part of a conserved DNA module involved in light responsiveness
Aco016689	Box 4	ATTAAT	1437	6	-	Petroselinum crispum	part of a conserved DNA module involved in light responsiveness
Aco016689	Box 4	ATTAAT	1644	6	-	Petroselinum crispum	part of a conserved DNA module involved in light responsiveness
Aco016689	WUN-motif	AAATTACT	1349	8	-	Nicotiana glutinosa
Aco016689	WUN-motif	AAATTACT	1562	8	-	Nicotiana glutinosa
Aco016689	Unnamed__1	CGTGG	134	5	-	Zea mays
Aco016689	Unnamed__1	CGTGG	781	5	-	Zea mays
Aco016689	Unnamed__1	CGTGG	809	5	-	Zea mays
Aco016689	Unnamed__1	CGTGG	912	5	-	Zea mays
Aco016689	DRE core	GCCGAC	918	6	-	Arabidopsis thaliana
Aco016689	DRE core	GCCGAC	1023	6	+	Arabidopsis thaliana
Aco016689	TGACG-motif	TGACG	768	5	-	Hordeum vulgare	cis-acting regulatory element involved in the MeJA-responsiveness
Aco016689	STRE	AGGGG	315	5	-	Arabidopsis thaliana
Aco016689	STRE	AGGGG	959	5	-	Arabidopsis thaliana
Aco016689	STRE	AGGGG	1281	5	-	Arabidopsis thaliana
Aco016689	STRE	AGGGG	1494	5	-	Arabidopsis thaliana
Aco016689	STRE	AGGGG	1837	5	+	Arabidopsis thaliana
Aco016689	STRE	AGGGG	1977	5	-	Arabidopsis thaliana
Aco016689	Unnamed__2	AACCTAACCT	622	9	-	Petroselinum hortense
Aco016689	Unnamed__2	CCCCGG	828	6	-	Zea mays
Aco016689	Unnamed__2	CCCCGG	1962	6	+	Zea mays
Aco016689	CAAT-box	CAAAT	41	5	-	Pisum sativum	common cis-acting element in promoter and enhancer regions
Aco016689	CAAT-box	CAAT	113	4	-	Nicotiana glutinosa
Aco016689	CAAT-box	CCAAT	125	5	-	Arabidopsis thaliana	common cis-acting element in promoter and enhancer regions
Aco016689	CAAT-box	CAAAT	167	5	-	Pisum sativum	common cis-acting element in promoter and enhancer regions
Aco016689	CAAT-box	CCAAT	222	5	-	Arabidopsis thaliana	common cis-acting element in promoter and enhancer regions
Aco016689	CAAT-box	CAAT	255	4	+	Nicotiana glutinosa
Aco016689	CAAT-box	CCAAT	277	5	+	Arabidopsis thaliana	common cis-acting element in promoter and enhancer regions
Aco016689	CAAT-box	CAAT	278	4	+	Nicotiana glutinosa
Aco016689	CAAT-box	CAAAT	419	5	+	Pisum sativum	common cis-acting element in promoter and enhancer regions
Aco016689	CAAT-box	CAAT	422	4	-	Nicotiana glutinosa
Aco016689	CAAT-box	CAAT	489	4	-	Nicotiana glutinosa
Aco016689	CAAT-box	CAAT	499	4	-	Nicotiana glutinosa
Aco016689	CAAT-box	CAAT	507	4	-	Nicotiana glutinosa
Aco016689	CAAT-box	CAAT	570	4	-	Nicotiana glutinosa
Aco016689	CAAT-box	CCAAT	637	5	+	Arabidopsis thaliana	common cis-acting element in promoter and enhancer regions
Aco016689	CAAT-box	CAAT	638	4	+	Nicotiana glutinosa
Aco016689	CAAT-box	CAAAT	771	5	+	Pisum sativum	common cis-acting element in promoter and enhancer regions
Aco016689	CAAT-box	CCAAT	850	5	+	Arabidopsis thaliana	common cis-acting element in promoter and enhancer regions
Aco016689	CAAT-box	CAAT	851	4	+	Nicotiana glutinosa
Aco016689	CAAT-box	CAAAT	993	5	-	Pisum sativum	common cis-acting element in promoter and enhancer regions
Aco016689	CAAT-box	CAAAT	1144	5	+	Pisum sativum	common cis-acting element in promoter and enhancer regions
Aco016689	CAAT-box	CAAT	1222	4	+	Nicotiana glutinosa
Aco016689	CAAT-box	CAAT	1241	4	+	Nicotiana glutinosa
Aco016689	CAAT-box	CAAT	1308	4	-	Nicotiana glutinosa
Aco016689	CAAT-box	CAAAT	1329	5	-	Pisum sativum	common cis-acting element in promoter and enhancer regions
Aco016689	CAAT-box	CAAT	1365	4	+	Nicotiana glutinosa
Aco016689	CAAT-box	CAAAT	1378	5	+	Pisum sativum	common cis-acting element in promoter and enhancer regions
Aco016689	CAAT-box	CAAAT	1427	5	-	Pisum sativum	common cis-acting element in promoter and enhancer regions
Aco016689	CAAT-box	CAAT	1521	4	-	Nicotiana glutinosa
Aco016689	CAAT-box	CAAAT	1542	5	-	Pisum sativum	common cis-acting element in promoter and enhancer regions
Aco016689	CAAT-box	CAAT	1578	4	+	Nicotiana glutinosa
Aco016689	CAAT-box	CAAAT	1591	5	+	Pisum sativum	common cis-acting element in promoter and enhancer regions
Aco016689	CAAT-box	CAAAT	1634	5	-	Pisum sativum	common cis-acting element in promoter and enhancer regions
Aco016689	CAAT-box	CCAAT	1816	5	-	Arabidopsis thaliana	common cis-acting element in promoter and enhancer regions
Aco016689		motif_sequence	173	4	+	organism	short_function
Aco016689		motif_sequence	298	4	-	organism	short_function
Aco016689		motif_sequence	351	4	+	organism	short_function
Aco016689		motif_sequence	436	4	+	organism	short_function
Aco016689		motif_sequence	611	4	+	organism	short_function
Aco016689		motif_sequence	687	4	-	organism	short_function
Aco016689		motif_sequence	853	4	+	organism	short_function
Aco016689		motif_sequence	1009	4	-	organism	short_function
Aco016689		motif_sequence	1532	4	-	organism	short_function
Aco016689		motif_sequence	1714	4	+	organism	short_function
Aco016689		motif_sequence	1841	4	-	organism	short_function
Aco016689		motif_sequence	1858	4	+	organism	short_function
Aco016689		motif_sequence	1970	4	+	organism	short_function
Aco016689	MBSI	aaaAaaC(G/C)GTTA	1068	10.5	+	Petunia hybrida	MYB binding site involved in flavonoid biosynthetic genes regulation
Aco016689	AT1-motif	AATTATTTTTTATT	1165	13	+	Solanum tuberosum	part of a light responsive module
Aco016689	ATCT-motif	AATCTAATCC	981	9	-	Pisum sativum	part of a conserved DNA module involved in light responsiveness
[truncated: 1,694 more rows]
