# Supplementary material for: Genome-wide identification, classification, and expression analysis of the HSF gene family in pineapple (Ananas comosus)
Source: PeerJ. 2021 Apr 27;9:e11329. doi: 10.7717/peerj.11329 (PMC8086565; doi:10.7717/peerj.11329)
Supplement: Supplemental Information 7 [file peerj-09-11329-s007.xlsx]

## Sheet: AcHSF gene expression profiles
Table S7. The expression profiles of the pineapple HSF genes in different tissues.
Gene Name	Ov1	Ov2	Ov3	Ov4	Ov5	Ov6	Ov7	St1	St2	St3	St4	St5	St6	Fr_S1	Fr_S2	Fr_S3	Fr_S4	Fr_S5	Fr_S7	Ro	Le	Fl
AcHSF-A1a	1.16517	0.897182	0.832471	0.881262	1.24898	1.45314	1.10761	0.944645	1.31951	0.896483	1.04347	1.85055	0.962298	2.18848	2.77669	3.09134	1.21777	1.42663	1.07473	3.27779	3.49334	3.21215
AcHSF-A1b	8.8727	7.53019	8.39884	8.61035	10.6732	10.8965	8.73453	8.09525	8.97674	10.3704	8.24743	6.45452	5.55275	9.37118	11.7691	12.5399	7.38449	8.43573	6.16594	3.46582	5.05596	4.50587
AcHSF-A1c	46.5322	40.4593	41.9916	45.3738	47.5467	61.5316	44.7827	35.1044	38.5133	35.1433	36.0322	29.2485	29.6789	60.1946	68.812	71.5381	66.4843	101.148	112.115	30.8622	18.3183	18.0612
AcHSF-A2	11.0801	31.8718	23.8154	28.3374	8.76323	15.8521	13.8339	3.99329	3.79341	39.4654	13.184	10.372	17.5596	2.02073	2.38672	0.988803	1.30533	4.2025	5.63227	22.9259	127.664	121.997
AcHSF-A3	7.67401	7.97237	7.66116	6.39124	10.0391	10.226	8.42131	6.337	6.62809	7.05418	6.15845	5.67634	6.26217	4.59259	8.06714	6.25976	3.24337	3.93657	4.66954	3.78531	11.7927	11.4514
AcHSF-A4	12.2901	13.8719	13.6998	19.431	11.0445	17.9235	14.9015	19.8875	13.4511	16.3667	14.4589	11.8886	14.2149	19.7982	12.7538	11.7338	11.7017	11.3898	17.7377	20.8574	20.1955	20.7986
AcHSF-A5	14.0742	13.1527	13.3318	13.0573	12.5862	18.8266	14.5996	13.4489	9.87732	10.0293	12.9576	8.69786	8.10264	12.3695	17.5621	19.9299	15.0448	21.5062	18.0997	8.56783	6.17643	6.12458
AcHSF-A6	10.5479	20.7715	21.5869	32.5402	35.3757	9.00664	15.8325	18.6464	17.9373	34.9613	51.1423	7.54649	3.54088	3.52553	2.30854	5.19824	8.68557	11.3192	7.02753	18.3856	84.7402	87.7476
AcHSF-A7a	12.9592	13.9515	15.6536	19.0173	20.6343	27.2783	19.6255	16.7104	11.3009	7.16788	6.97958	7.99821	10.0515	28.6074	19.1768	16.5873	9.29833	10.3422	14.4073	8.79754	28.1846	27.8288
AcHSF-A7b	5.36737	14.6499	7.52474	14.1644	7.5412	16.4826	13.5532	3.27552	1.38131	4.65125	5.28085	5.82664	1.07507	12.5914	52.4837	66.5995	60.2017	53.8535	37.1038	0.309741	13.8917	12.1951
AcHSF-A9a	16.8445	14.4386	12.5738	16.9983	15.4276	9.47781	11.2676	25.4161	21.2201	24.8676	30.9165	17.0236	24.8809	3.26873	4.65899	5.62475	10.4197	11.2963	15.5551	3.43563	22.1578	23.9813
AcHSF-A9b	2.42523	1.4767	2.69323	3.24625	4.29479	3.15707	5.10278	1.55774	1.58568	2.47993	2.4355	2.77859	2.54063	0.511184	3.07108	2.71714	0.812591	1.53645	2.5468	0.445635	2.65663	4.78186
AcHSF-B1a	3.93675	5.77608	4.58486	10.3466	6.07846	7.72191	13.9738	2.6495	4.0422	5.63329	8.23951	9.56943	13.7224	0.554499	0.697016	0.407274	2.0913	3.01338	5.18141	6.64368	6.51756	7.62997
AcHSF-B1b	0.0524365	0.128676	0.259426	0.573463	0.448853	0.433078	0.700723	0.947474	0.255045	7.53188	4.2262	0.567025	0.411715	1.54699	1.53357	1.87542	2.69278	1.89443	7.7249	6.91973	0	0.0700579
AcHSF-B1c	0	0	0	0	0	0	0	0	0	0	0	0	0	0	0	0	0	0	0	3.20374	0	0.0879242
AcHSF-B2a	0.324705	0.50617	0.373364	7.83447	0.379854	0.306039	0.604168	8.92217	0.830534	0.0876499	0.323259	0.932362	0.7772	1.50183	0.881424	0.373375	1.3801	3.03167	35.6519	0.258363	2.71166	3.33784
AcHSF-B2b	8.41299	10.1904	13.1575	20.0772	6.90804	15.1615	21.9267	5.57278	8.40663	10.5661	10.4178	14.8182	17.7277	6.2321	30.4383	20.4364	18.6323	22.8322	33.482	4.80636	41.4811	39.2842
AcHSF-B4b	187.121	153.687	120.476	192.585	121.806	175.668	121.927	12.5256	10.384	11.155	16.457	20.6451	12.6429	0.804383	3.49713	0.646557	1.07445	1.70348	0.341748	10.6248	2.3641	2.21377
AcHSF-B4c	17.1213	15.0954	16.524	15.4294	12.0085	12.9428	13.4324	3.87414	5.88989	5.87048	2.89179	2.06117	0.429384	0	0.149903	0	0	0	0	0.2613	0.202565	0.127534
AcHSF-C1a	0.0213661	0.135746	0.07308	0	0	0	0.0763347	0.297482	1.09416	3.97401	2.63466	0	0	0	0	0	0.156856	0	0	0.423208	1.23611	0.320962
AcHSF-C1b	0.111024	0.199474	0.411741	0	0	0.510701	1.57213	0.914946	0.165939	0.162861	0	1.4917	1.90303	1.31648	3.79781	1.50814	3.50295	4.9454	3.48858	12.447	0.215746	0.228113
AcHSF-C2	1.4072	1.54128	0.693596	1.15658	0.28502	7.28501	0.729138	1.38905	0.174457	0.849279	0.52885	0.149679	0.912929	10.0792	33.4577	22.6581	5.02895	6.10198	72.6346	3.35486	0.609127	0.343687
