# Supplementary material for: Genome-wide identification, classification, and expression analysis of the HSF gene family in pineapple (Ananas comosus)
Source: PeerJ. 2021 Apr 27;9:e11329. doi: 10.7717/peerj.11329 (PMC8086565; doi:10.7717/peerj.11329)
Supplement: Supplemental Information 8 [file peerj-09-11329-s008.xlsx]

## Sheet: qRT-PCR primers
Table S8. Primers used for qRT-PCR of AcHSFs genes.
NO.	Primer Name	Sequence
1	Aco027746-F	CTTCGTCGGTGCGTACATAA
2	Aco027746-R	CTGCTCATCATCGCCATACA
3	Aco008819-F	TTGGGAGGAGTTGCTTAATGG
4	Aco008819-R	CATCCACATCCTCAGCACTATC
5	Aco021879-F	CCTCATGCAGGAGCTAGTAAAG
6	Aco021879-R	GTTCTGTTCCATTCCCTGAAGA
7	Aco002688-F	AGGAGACAACGAAGGAGAGA
8	Aco002688-R	CCCACCTCAAGACCTTTCAA
9	Aco013873-F	TGACGGAGGAGAACGAGAG
10	Aco013873-R	GACATGAGGTGGAGGATGTTG
11	Aco006046-F	CGAAGATGAGGATGAGGATGTG
12	Aco006046-R	CTCTGTCGCCTGTATTCTCTTG
