# Supplementary material for: Genome-wide identification, classification, and expression analysis of the HSF gene family in pineapple (Ananas comosus)
Source: PeerJ. 2021 Apr 27;9:e11329. doi: 10.7717/peerj.11329 (PMC8086565; doi:10.7717/peerj.11329)
Supplement: Supplemental Information 9 [file peerj-09-11329-s009.xlsx]

## Sheet: qPCR resulte
Table S9. qRT-PCR results of the pineapple HSF verification genes.
4℃
Target	Sample	Cq		Target	Sample	Cq		Target	Sample	Cq		Target	Sample	Cq		Target	Sample	Cq		Target	Sample	Cq		Target	Sample	Cq
A1a	4℃-12h	26.0308		A2a	4℃-12h	25.9752		A9a	4℃-12h	26.5199		B1a	4℃-12h	26.4082		B2a	4℃-12h	26.7352		C1a	4℃-12h	26.6117		HK2	4-12	20.9829
A1a	4℃-12h	26.5757		A2a	4℃-12h	26.3352		A9a	4℃-12h	26.3424		B1a	4℃-12h	26.5503		B2a	4℃-12h	26.9518		C1a	4℃-12h	26.3545		HK2	4-12	20.536
A1a	4℃-12h	26.3255		A2a	4℃-12h	26.0725		A9a	4℃-12h	26.3256		B1a	4℃-12h	26.4154		B2a	4℃-12h	26.8183		C1a	4℃-12h	26.0415		HK2	4-12	20.1529
A1a	4℃-12h	26.0182		A2a	4℃-12h	26.1956		A9a	4℃-12h	25.0941		B1a	4℃-12h	26.1816		B2a	4℃-12h	25.749		C1a	4℃-12h	26.2013		HK2	4-12	20.0891
A1a	4℃-24h	32.4788		A2a	4℃-24h	32.5915		A9a	4℃-24h	31.0806		B1a	4℃-24h	31.9974		B2a	4℃-24h	31.9047		C1a	4℃-24h	32.8674		HK2	4-24	27.7036
A1a	4℃-24h	32.1907		A2a	4℃-24h	30.9434		A9a	4℃-24h	30.4644		B1a	4℃-24h	31.3769		B2a	4℃-24h	33.3211		C1a	4℃-24h	32.2684		HK2	4-24	26.677
A1a	4℃-24h	32.3963		A2a	4℃-24h	31.5195		A9a	4℃-24h	30.5378		B1a	4℃-24h	31.7527		B2a	4℃-24h	33.2646		C1a	4℃-24h	32.0368		HK2	4-24	26.8356
A1a	4℃-24h	31.8257		A2a	4℃-24h	31.7701		A9a	4℃-24h	30.5582		B1a	4℃-24h	31.0377		B2a	4℃-24h	33.43		C1a	4℃-24h	33.1792		HK2	4-24	27.1778
A1a	4℃-48h	33.8572		A2a	4℃-48h	34.2116		A9a	4℃-48h	31.9892		B1a	4℃-48h	33.9388		B2a	4℃-48h	33.3423		C1a	4℃-48h	33.962		HK2	4-48	27.038
A1a	4℃-48h	34.6487		A2a	4℃-48h	34.685		A9a	4℃-48h	33.0761		B1a	4℃-48h	33.0843		B2a	4℃-48h	33.3885		C1a	4℃-48h	33.8065		HK2	4-48	26.9353
A1a	4℃-48h	33.5657		A2a	4℃-48h	33.1116		A9a	4℃-48h	33.529		B1a	4℃-48h	33.4846		B2a	4℃-48h	33.3009		C1a	4℃-48h	33.9811		HK2	4-48	26.9482
A1a	4℃-48h	34.2112		A2a	4℃-48h	34.0116		A9a	4℃-48h	33.3045		B1a	4℃-48h	32.4426		B2a	4℃-48h	34.6709		C1a	4℃-48h	34.4266		HK2	4-48	26.9194
45℃
Target	Sample	Cq		Target	Sample	Cq		Target	Sample	Cq		Target	Sample	Cq		Target	Sample	Cq		Target	Sample	Cq		Target	Sample	Cq
A1a	45℃-12h	28.0672		A2a	45℃-12h	25.6624		A9a	45℃-12h	28.5982		B1a	45℃-12h	35.0596		B2a	45℃-12h	31.2704		C1a	45℃-12h	32.6392		HK2	45-12	23.2512
A1a	45℃-12h	27.8222		A2a	45℃-12h	25.3905		A9a	45℃-12h	28.1927		B1a	45℃-12h	36.7301		B2a	45℃-12h	30.9417		C1a	45℃-12h	32.1129		HK2	45-12	23.1452
A1a	45℃-12h	27.8606		A2a	45℃-12h	25.3295		A9a	45℃-12h	28.6267		B1a	45℃-12h	36.5663		B2a	45℃-12h	30.5076		C1a	45℃-12h	32.242		HK2	45-12	22.3023
A1a	45℃-12h	27.6341		A2a	45℃-12h	25.3024		A9a	45℃-12h	29.16		B1a	45℃-12h	34.6551		B2a	45℃-12h	31.2171		C1a	45℃-12h	32.3079		HK2	45-12	22.6688
A1a	45℃-24h	32.8239		A2a	45℃-24h	28.4684		A9a	45℃-24h	30.9746		B1a	45℃-24h	32.9068		B2a	45℃-24h	31.1863		C1a	45℃-24h	33.0128		HK2	45-24	27.1951
A1a	45℃-24h	32.237		A2a	45℃-24h	28.2975		A9a	45℃-24h	31.9711		B1a	45℃-24h	33.4538		B2a	45℃-24h	31.861		C1a	45℃-24h	32.32		HK2	45-24	26.5662
A1a	45℃-24h	31.8648		A2a	45℃-24h	28.1964		A9a	45℃-24h	32.071		B1a	45℃-24h	33.4757		B2a	45℃-24h	31.9674		C1a	45℃-24h	32.6294		HK2	45-24	26.9784
A1a	45℃-24h	31.3335		A2a	45℃-24h	29.1895		A9a	45℃-24h	32.4155		B1a	45℃-24h	34.3266		B2a	45℃-24h	30.8469		C1a	45℃-24h	32.3888		HK2	45-24	27.0816
A1a	45℃-48h	32.4242		A2a	45℃-48h	29.6772		A9a	45℃-48h	31.6132		B1a	45℃-48h	32.6456		B2a	45℃-48h	30.2638		C1a	45℃-48h	34.321		HK2	45-48	27.0802
A1a	45℃-48h	32.8906		A2a	45℃-48h	30.6723		A9a	45℃-48h	31.7811		B1a	45℃-48h	32.5526		B2a	45℃-48h	32.1893		C1a	45℃-48h	31.9823		HK2	45-48	27.2668
A1a	45℃-48h	32.4346		A2a	45℃-48h	30.2514		A9a	45℃-48h	32.2891		B1a	45℃-48h	32.5544		B2a	45℃-48h	32.281		C1a	45℃-48h	32.5753		HK2	45-48	27.1839
A1a	45℃-48h	32.2282		A2a	45℃-48h	31.2204		A9a	45℃-48h	33.1518		B1a	45℃-48h	34.8502		B2a	45℃-48h	32.1456		C1a	45℃-48h	33.6195		HK2	45-48	27.3857
ABA
Target	Sample	Cq		Target	Sample	Cq		Target	Sample	Cq		Target	Sample	Cq		Target	Sample	Cq		Target	Sample	Cq		Target	Sample	Cq
A1a	ABA-12h	29.9084		A2a	ABA-12h	30.5288		A9a	ABA-12h	30.1871		B1a	ABA-12h	32.427		B2a	ABA-12h	30.2847		C1a	ABA-12h	31.8047		HK2	ABA-12	25.7545
A1a	ABA-12h	30.7127		A2a	ABA-12h	30.6091		A9a	ABA-12h	30.759		B1a	ABA-12h	31.4996		B2a	ABA-12h	30.8899		C1a	ABA-12h	31.3627		HK2	ABA-12	26.204
A1a	ABA-12h	30.7326		A2a	ABA-12h	30.5559		A9a	ABA-12h	30.3055		B1a	ABA-12h	31.2411		B2a	ABA-12h	30.5799		C1a	ABA-12h	32.2491		HK2	ABA-12	25.7061
A1a	ABA-12h	31.2025		A2a	ABA-12h	30.6213		A9a	ABA-12h	30.0058		B1a	ABA-12h	31.2797		B2a	ABA-12h	31.0387		C1a	ABA-12h	32.7943		HK2	ABA-12	25.8522
A1a	ABA-24h	29.5578		A2a	ABA-24h	29.8229		A9a	ABA-24h	29.1463		B1a	ABA-24h	30.6823		B2a	ABA-24h	30.1358		C1a	ABA-24h	30.4932		HK2	ABA-24	24.9036
A1a	ABA-24h	29.3069		A2a	ABA-24h	30.0804		A9a	ABA-24h	29.5172		B1a	ABA-24h	31.5916		B2a	ABA-24h	29.9961		C1a	ABA-24h	31.1318		HK2	ABA-24	24.2153
A1a	ABA-24h	29.3059		A2a	ABA-24h	30.2232		A9a	ABA-24h	29.3754		B1a	ABA-24h	31.163		B2a	ABA-24h	30.4815		C1a	ABA-24h	31.6038		HK2	ABA-24	24.2671
A1a	ABA-24h	30.4125		A2a	ABA-24h	29.3283		A9a	ABA-24h	30.1185		B1a	ABA-24h	31.4776		B2a	ABA-24h	30.5052		C1a	ABA-24h	30.4002		HK2	ABA-24	24.3827
A1a	ABA-48h	30.6678		A2a	ABA-48h	28.9664		A9a	ABA-48h	31.2091		B1a	ABA-48h	31.6255		B2a	ABA-48h	32.0512		C1a	ABA-48h	34.2587		HK2	ABA-48	24.8987
A1a	ABA-48h	31.0391		A2a	ABA-48h	29.2859		A9a	ABA-48h	31.9192		B1a	ABA-48h	32.0615		B2a	ABA-48h	32.6785		C1a	ABA-48h	34.9059		HK2	ABA-48	24.3007
A1a	ABA-48h	30.5966		A2a	ABA-48h	28.8872		A9a	ABA-48h	31.5712		B1a	ABA-48h	32.8196		B2a	ABA-48h	32.2882		C1a	ABA-48h	34.7001		HK2	ABA-48	24.1654
A1a	ABA-48h	31.1283		A2a	ABA-48h	29.4917		A9a	ABA-48h	30.3007		B1a	ABA-48h	32.4106		B2a	ABA-48h	32.2949		C1a	ABA-48h	33.863		HK2	ABA-48	24.9952
Contral
Target	Sample	Cq		Target	Sample	Cq		Target	Sample	Cq		Target	Sample	Cq		Target	Sample	Cq		Target	Sample	Cq		Target	Sample	Cq
A1a	0h	27.0902		A2a	0h	28.0515		A9a	0h	27.432		B1a	0h	32.7949		B2a	0h	31.6251		C1a	0h	35.2282		HK2	0h	18.4721
A1a	0h	26.2604		A2a	0h	26.8088		A9a	0h	28.0406		B1a	0h	31.2791		B2a	0h	31.9935		C1a	0h	32.1664		HK2	0h	19.9539
A1a	0h	25.8763		A2a	0h	26.5093		A9a	0h	28.2095		B1a	0h	31.7938		B2a	0h	31.2466		C1a	0h	34.2573		HK2	0h	18.1605
A1a	0h	25.1705		A2a	0h	26.46		A9a	0h	27.7937		B1a	0h	33.3871		B2a	0h	31.2969		C1a	0h	33.1228		HK2	0h	18.4739
